# Supplementary material for: Eruptive history and 40Ar/39Ar geochronology of the Milos volcanicfield, Greece
Source: Copernicus journal article supplement (doi:10.5194/gchron-2020-30), 2020-10-13
Supplement: Supplementary file 1 [file gchron-2020-30-supplement.zip]

Archive with 4 entries (4 files):
- Supplementary material I.pdf
- Supplementary material II-fusion data.xls
- Supplementary material II-incremental data.xls
- Supplementary material III.pdf
