# Supplementary material for: Eruptive history and 40Ar/39Ar geochronology of the Milos volcanicfield, Greece
Source: Copernicus journal article supplement (doi:10.5194/gchron-2020-30), 2020-10-13
Supplement: Supplementary file 1 [file gchron-2020-30-supplement.zip › Supplementary material I.pdf]

The images of outcrop and rock texture from the island of Milos

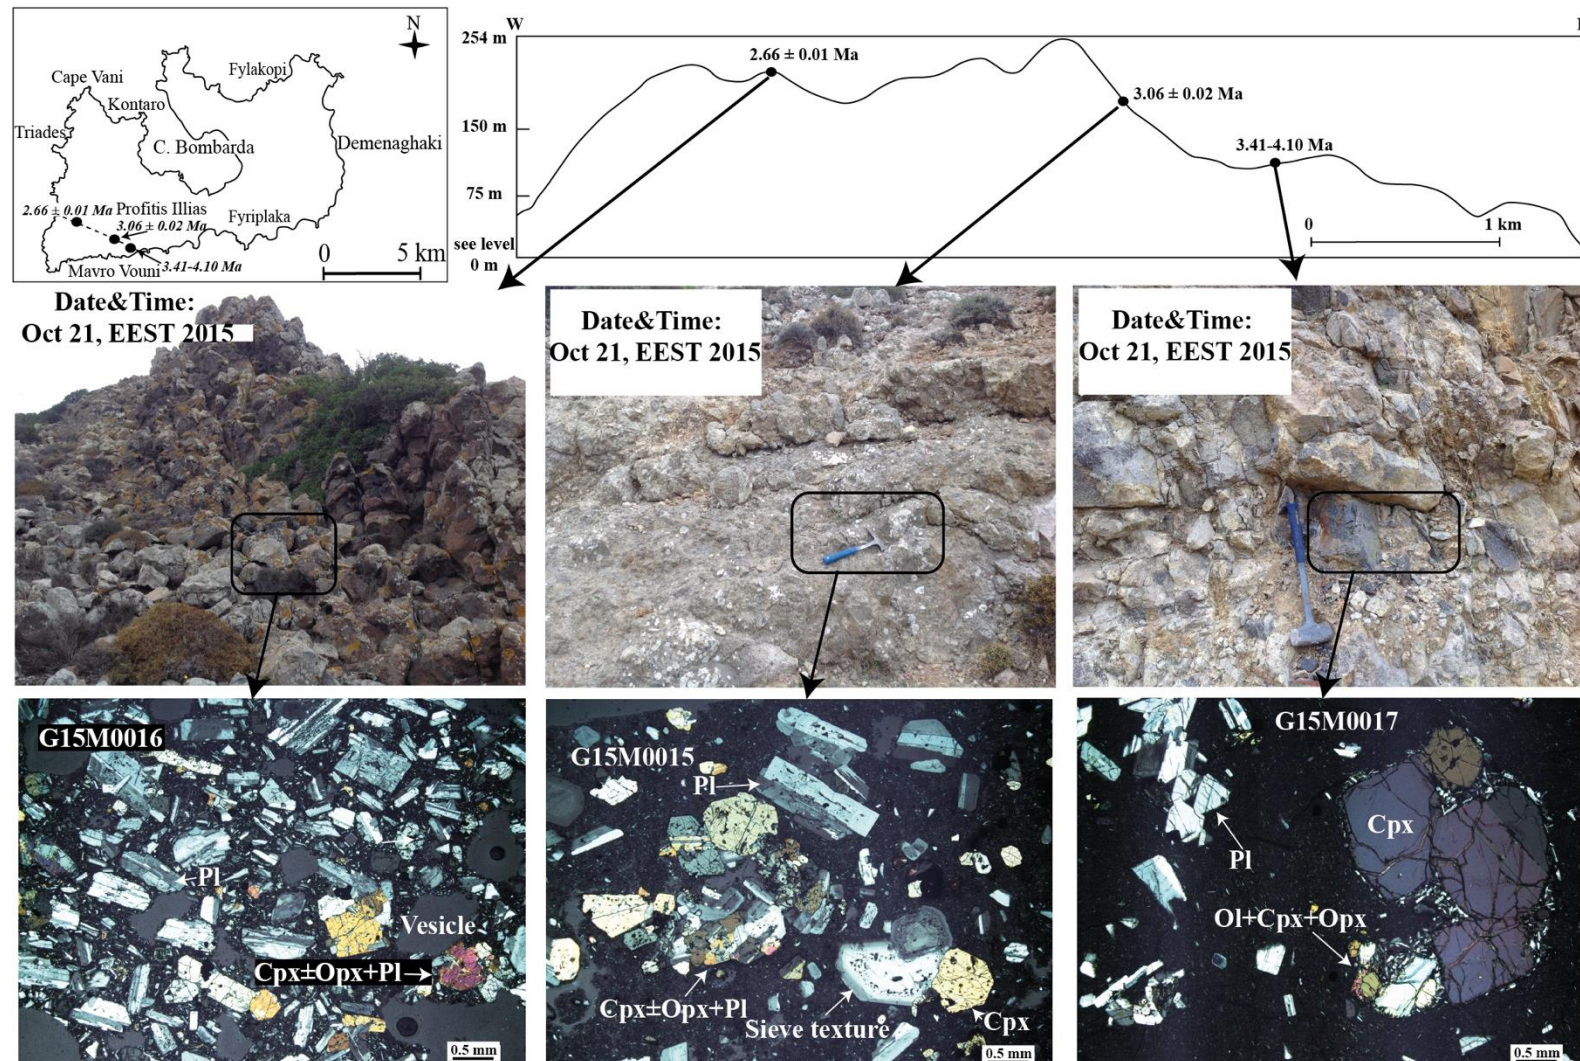

**Figure S1.1** The outcrops and thin sections for sample G15M0015-17 (2.66-4.10 Ma) are from the southwest of Milos.

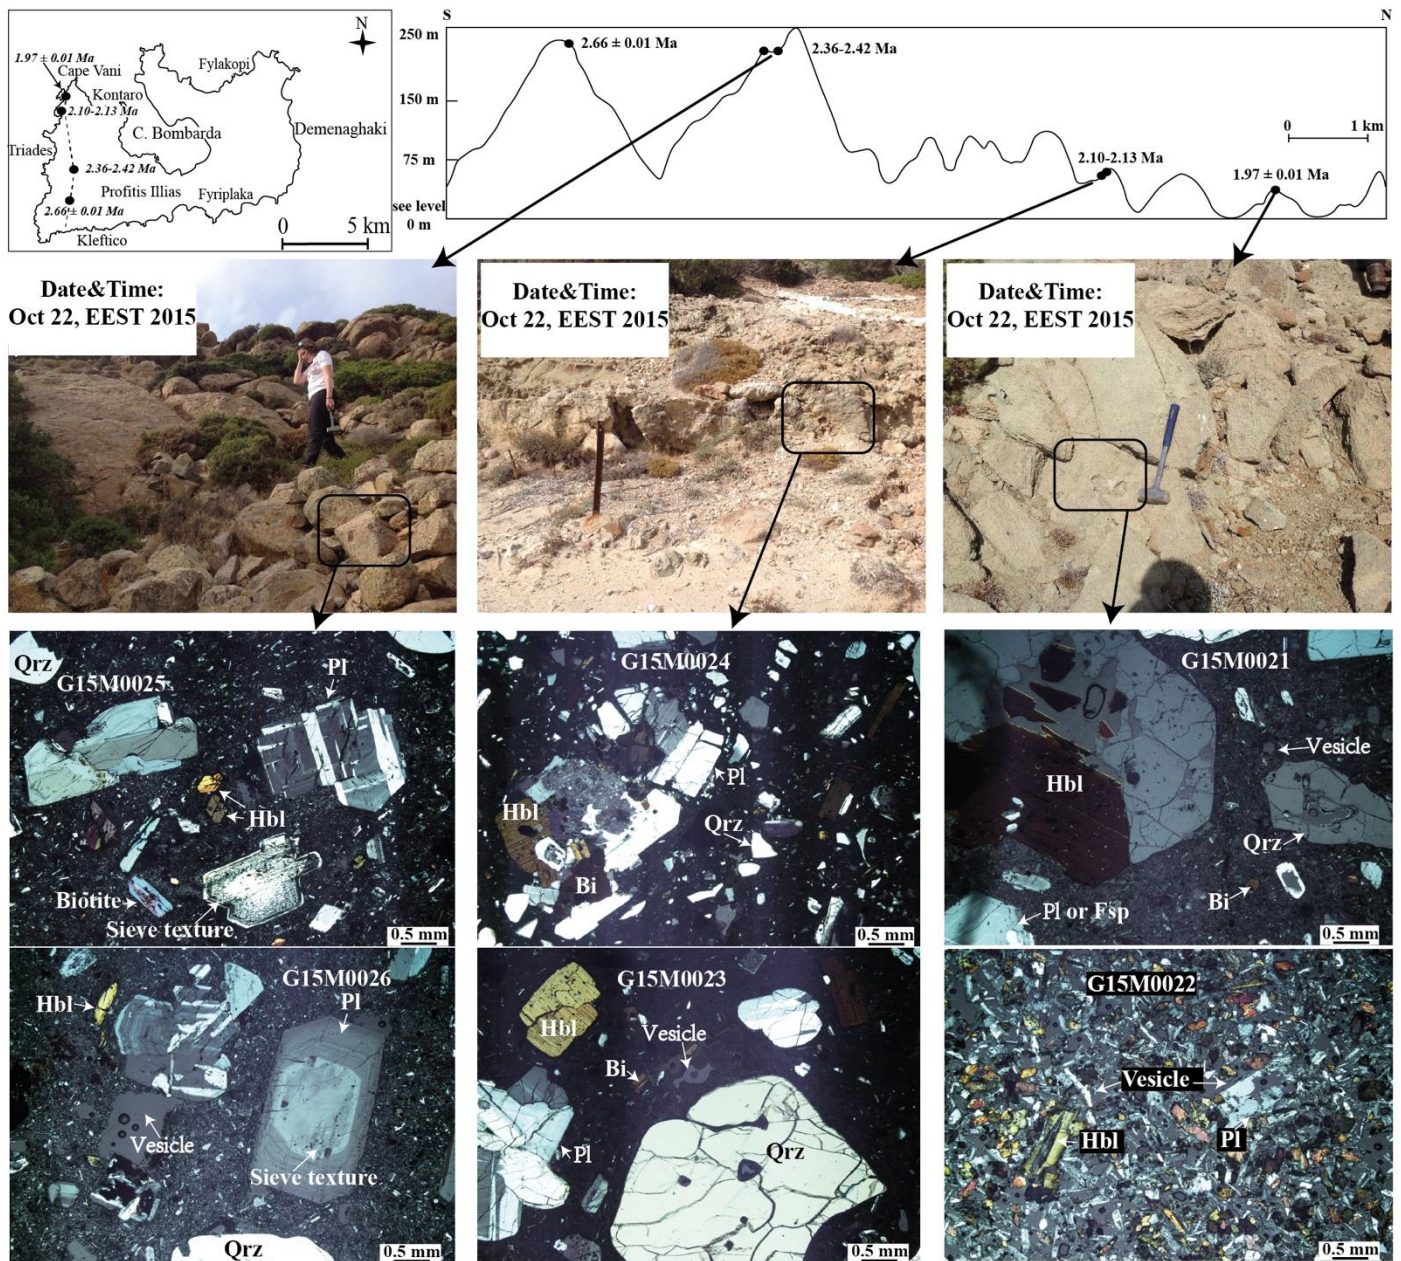

**Figure S1.2** The outcrops and thin sections for sample G15M0021-26 (1.97-2.42 Ma) are from the west-northwest of Milos.

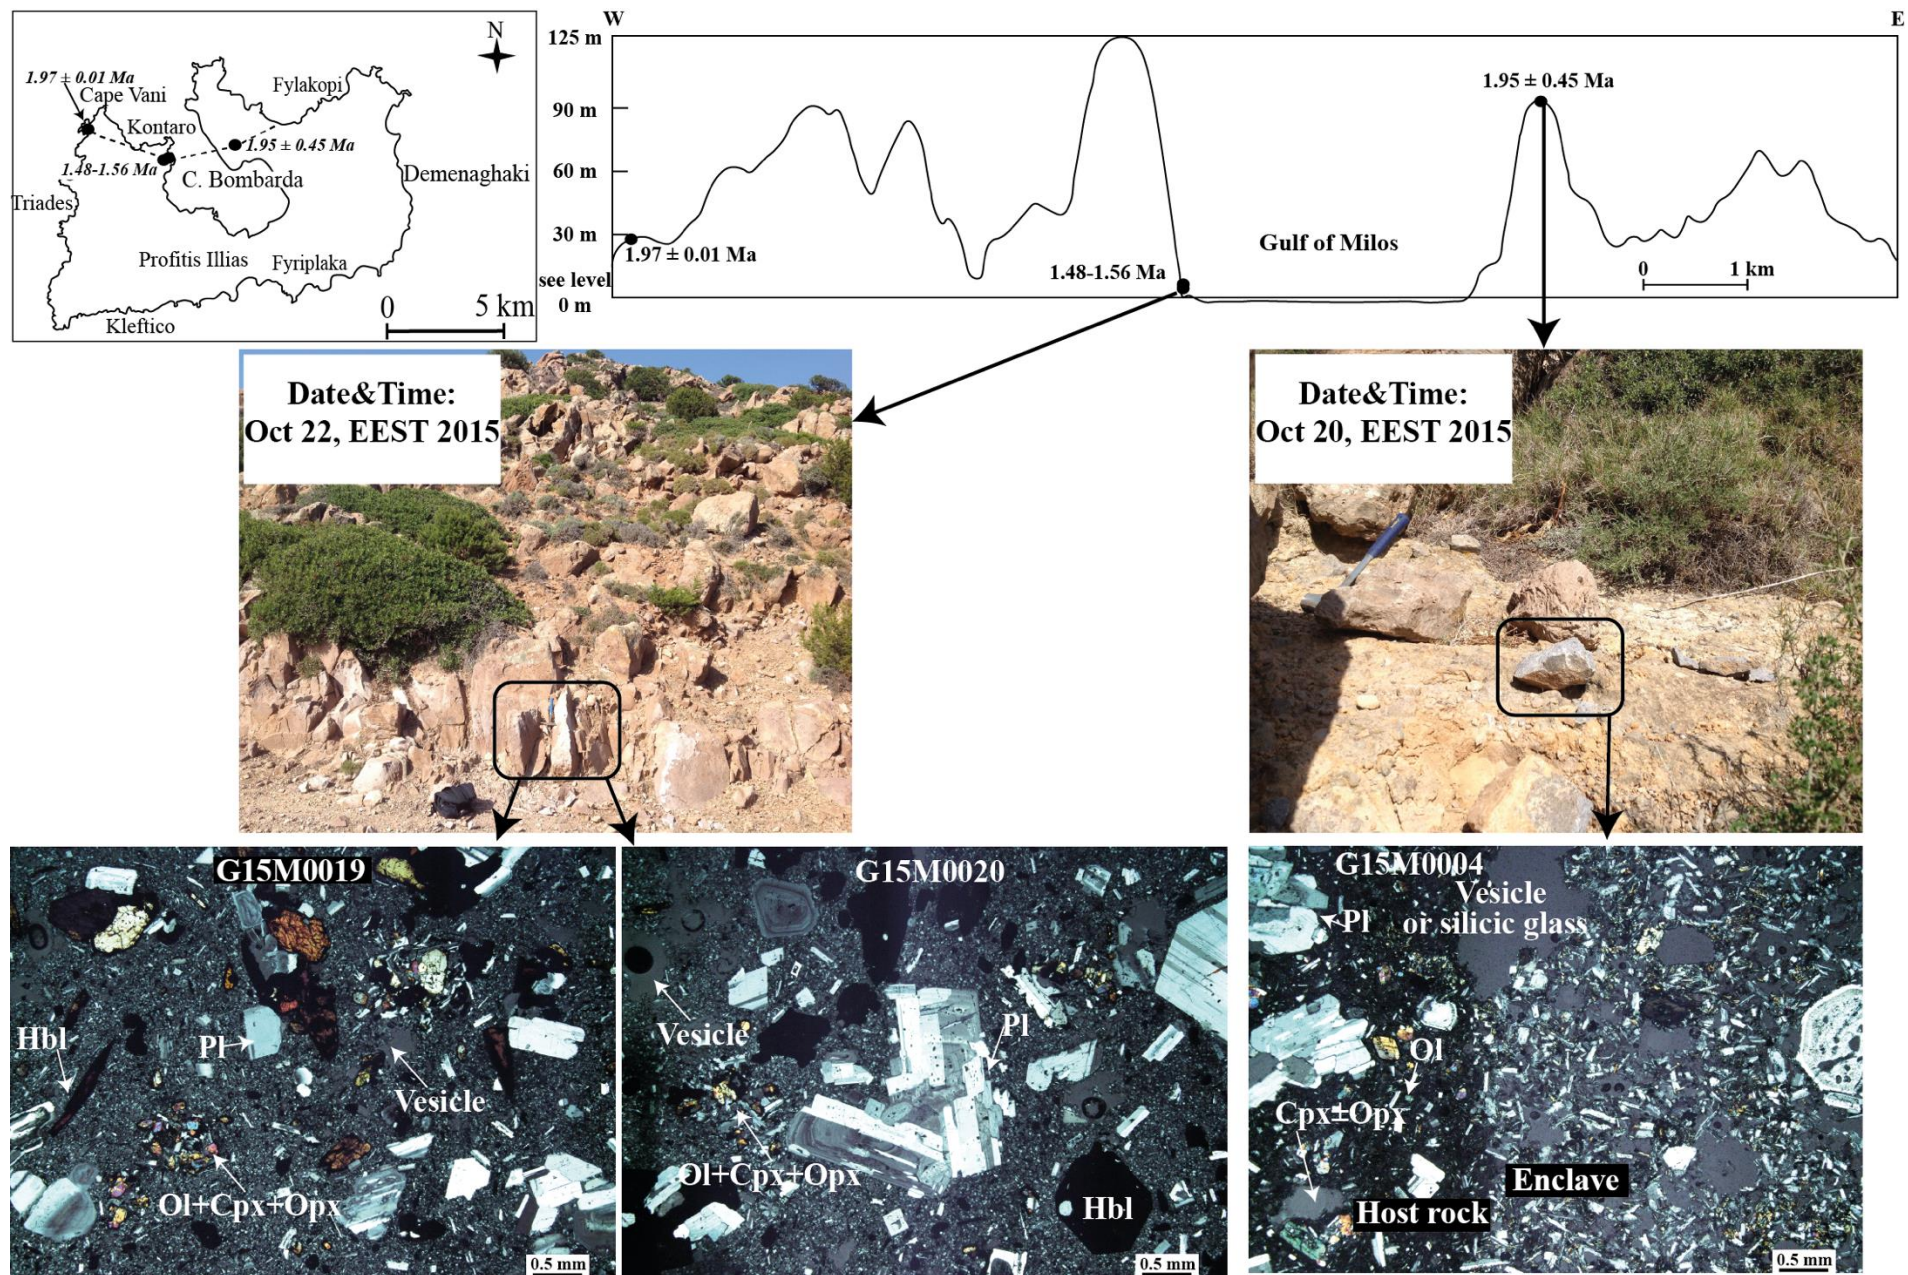

**Figure S1.3** The outcrops and thin sections for sample G15M0019-20 ( $1.48-1.56$  Ma) and G15M0004 ( $1.95 \pm 0.45$  Ma) are from the northwest-north of Milos.

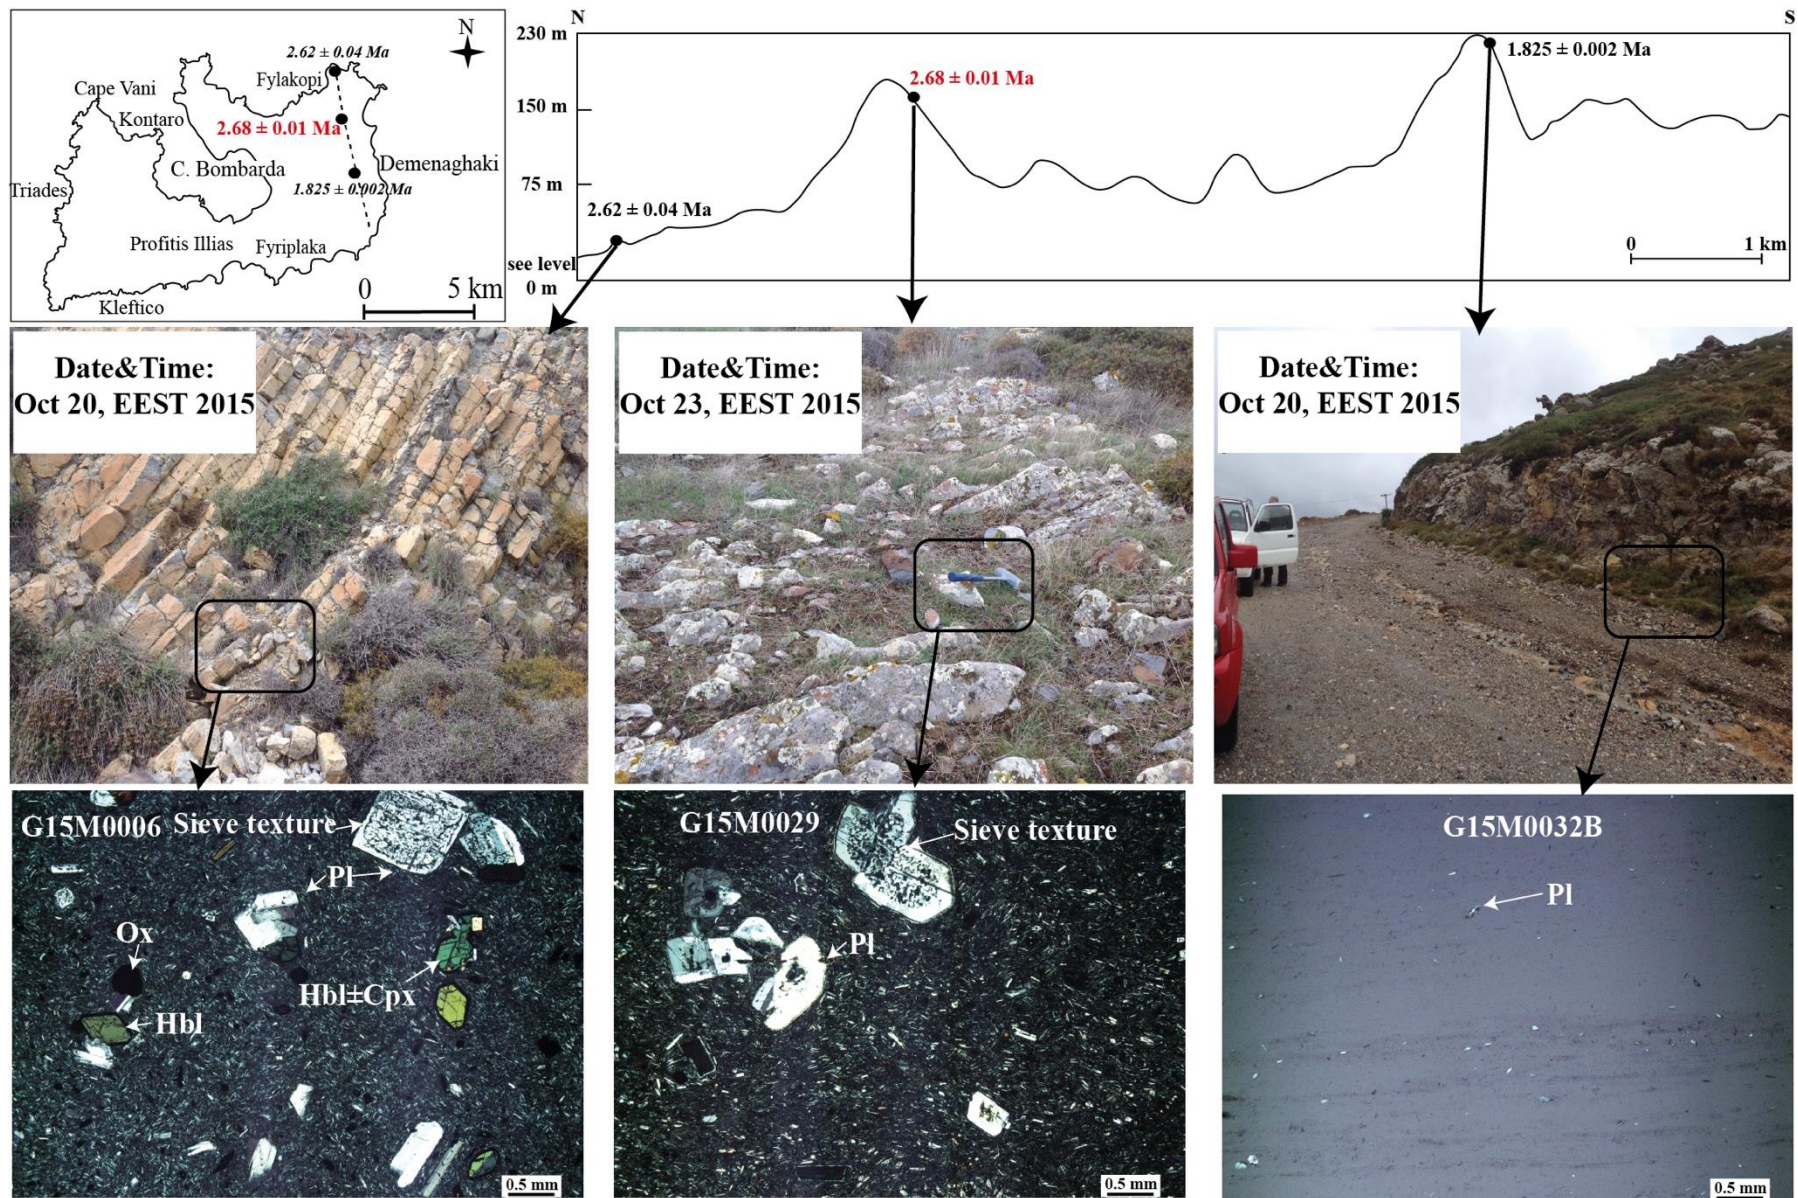

**Figure S1.4** The outcrops and thin sections for sample G15M0006( $2.62 \pm 0.04$  Ma), G15M0029 ( $2.68 \pm 0.01$  Ma) and G15M0032B ( $1.825 \pm 0.002$  Ma) are from the northeast-east of Milos. The number in red indicates an age which is discarded in this study. See details in main text.

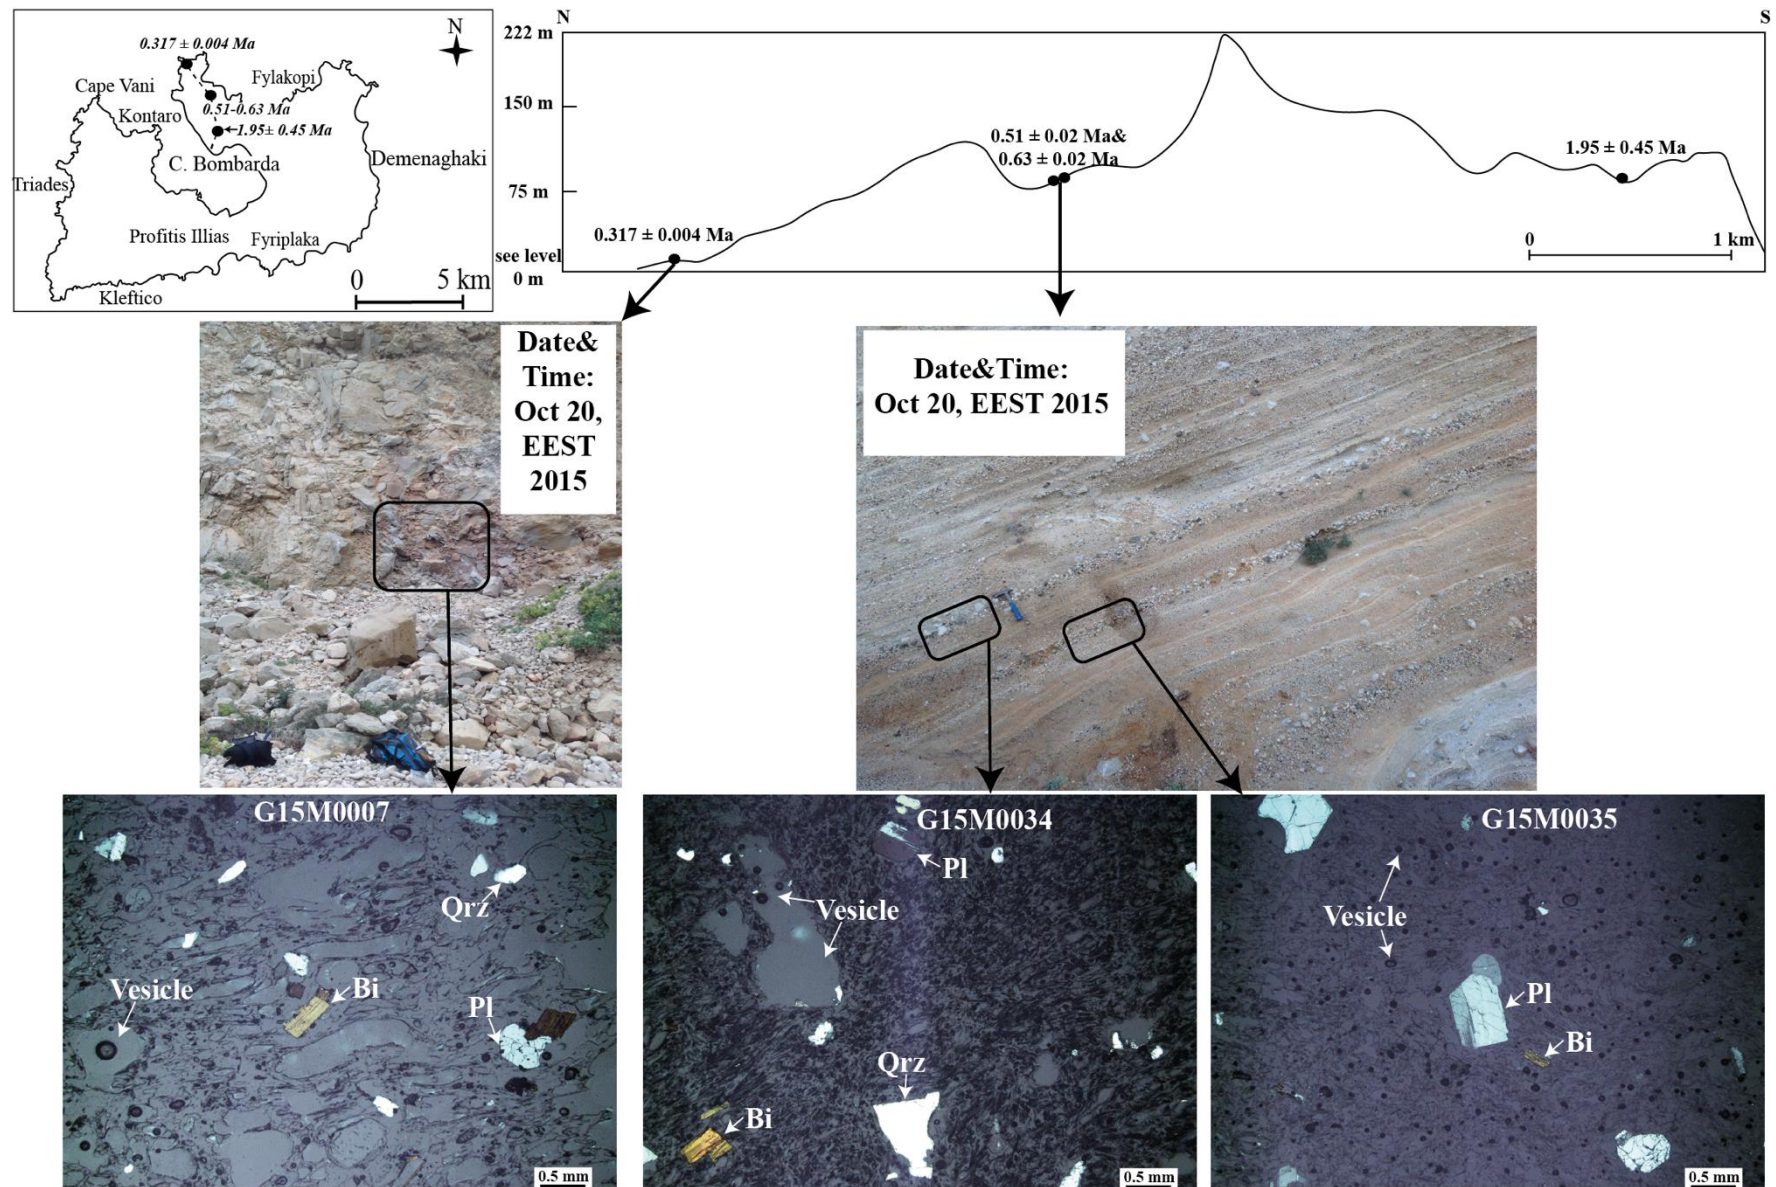

**Figure S1.5** The outcrops and thin sections for sample G15M0034-35 ( $0.51-0.63$  Ma) and G15M0007 ( $0.317 \pm 0.004$  Ma) are from the north most of Milos.

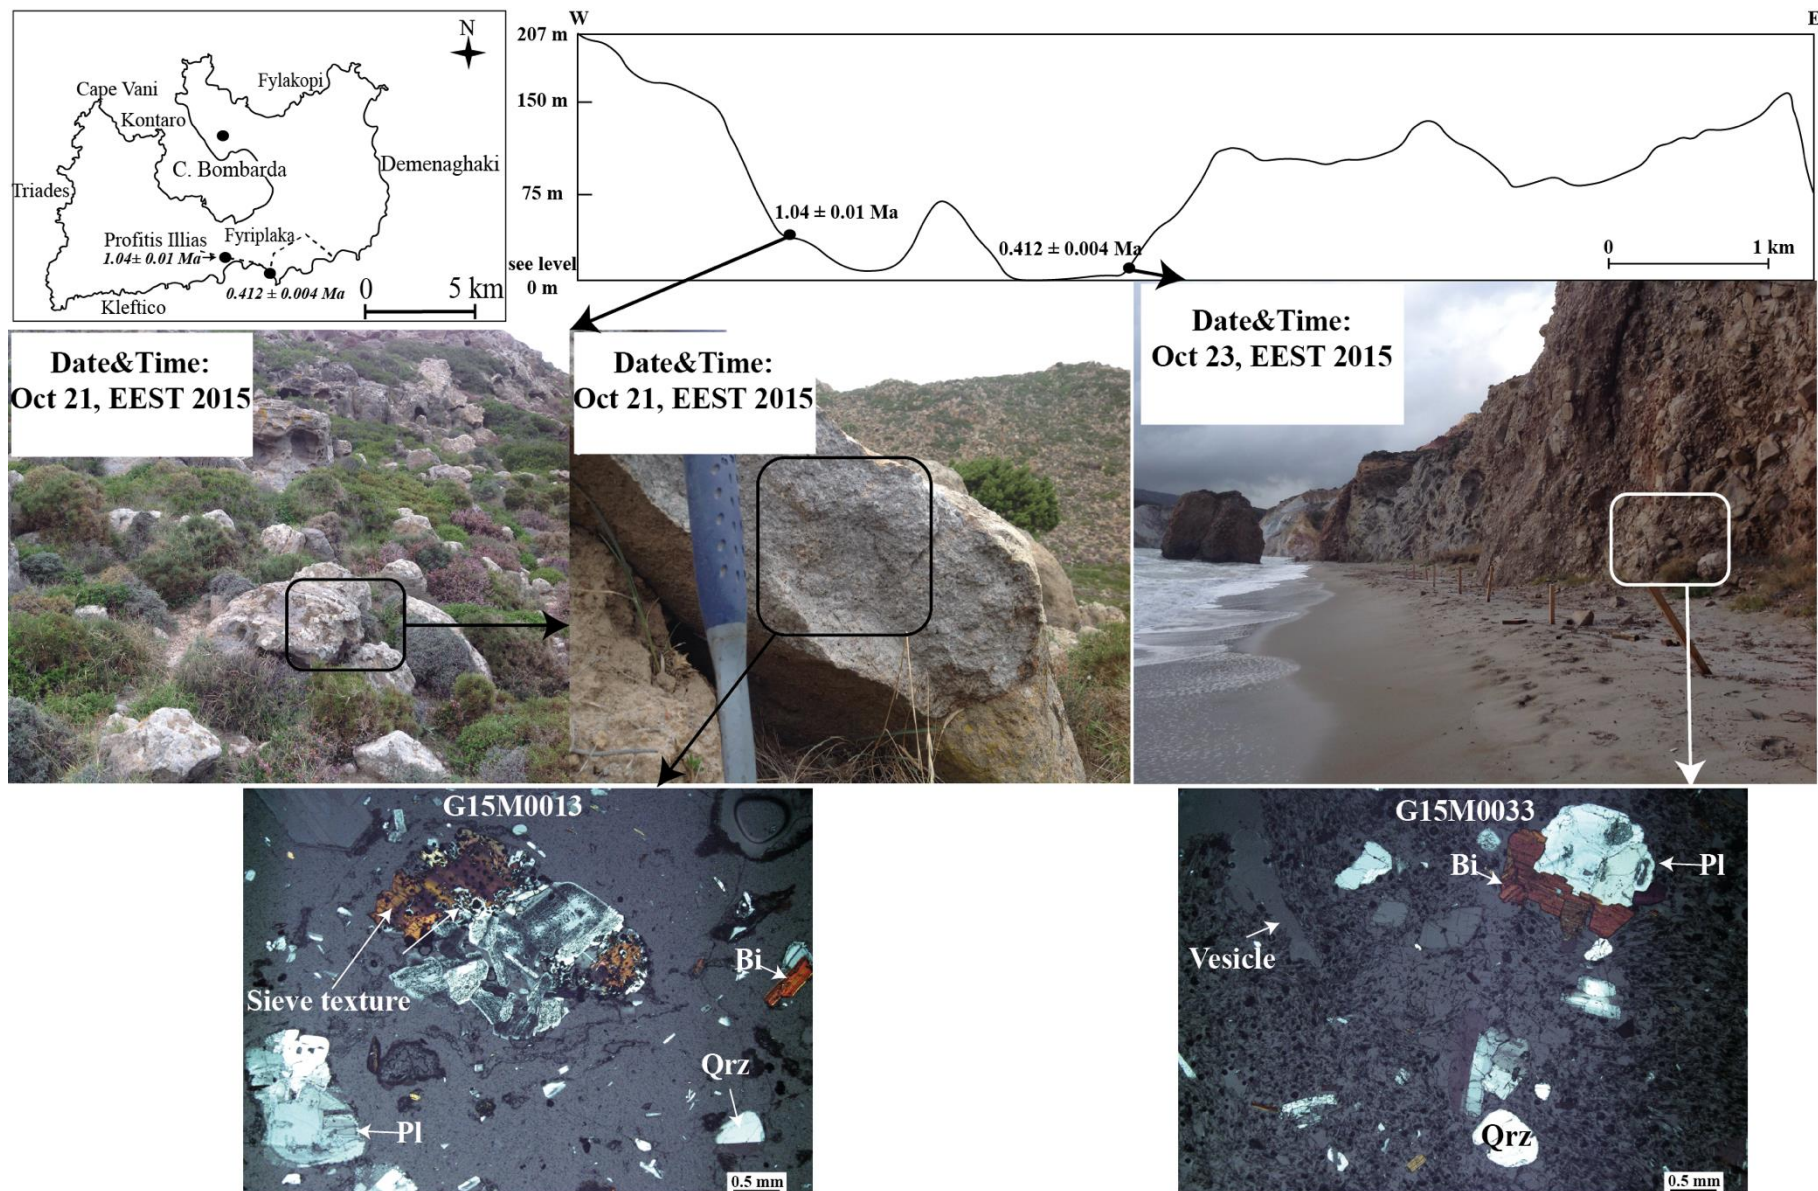

**Figure S1.6** The outcrops and thin sections for sample G15M0013 ( $1.04 \pm 0.01 \text{ Ma}$ ) and G15M0033 ( $0.412 \pm 0.004 \text{ Ma}$ ), respectively, are from Halepa lava cone and Tsigrado tuff cone in the south of Milos.

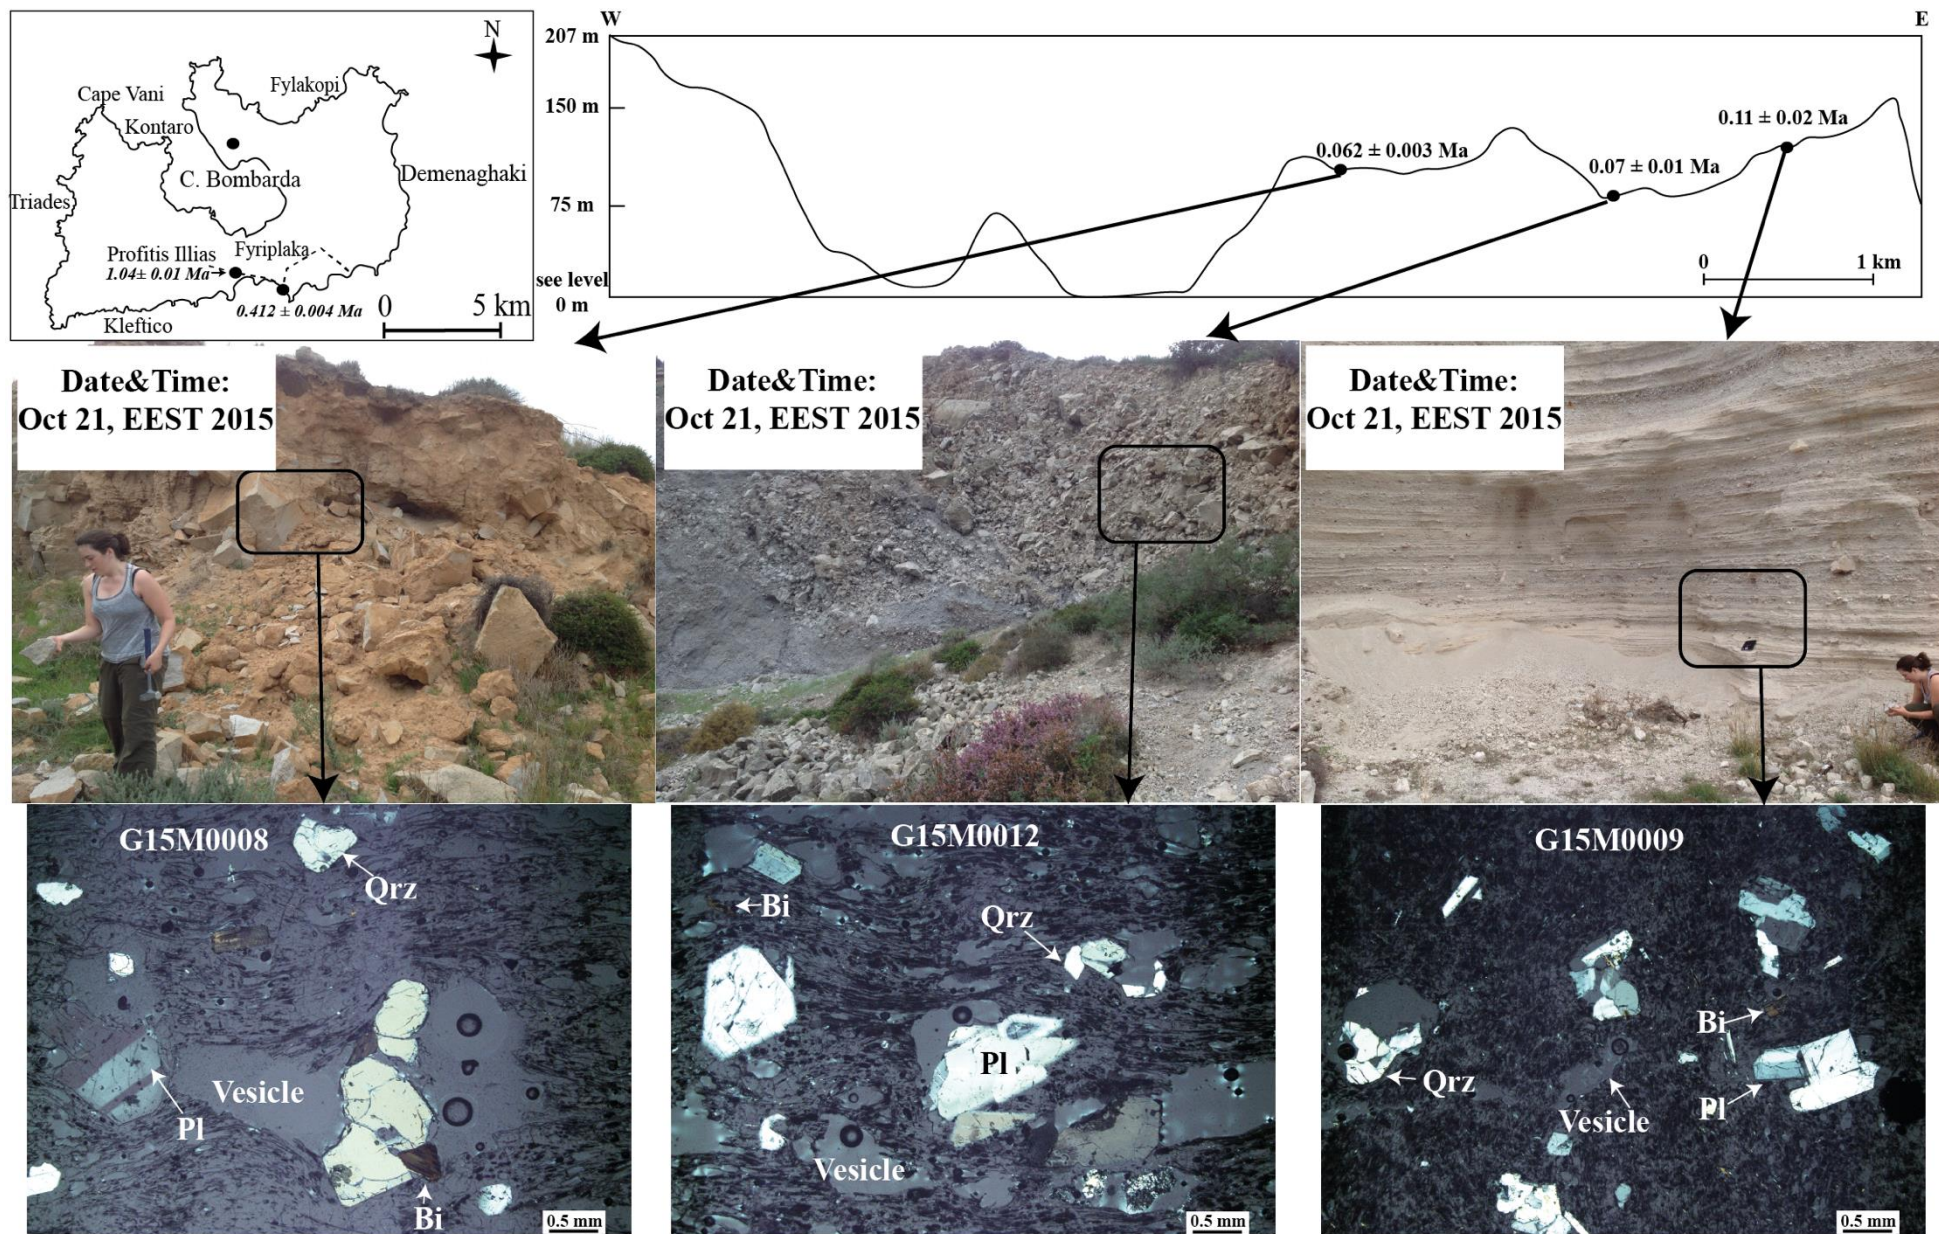

**Figure S1.7** The outcrops and thin sections for sample G15M0008-9 and G15M0012 (0.06-0.11 Ma) are from different tuff-ring layers of Fyriplaka tuff cone in the south of Milos.
