# Supplementary material for: Eruptive history and 40Ar/39Ar geochronology of the Milos volcanicfield, Greece
Source: Copernicus journal article supplement (doi:10.5194/gchron-2020-30), 2020-10-13
Supplement: Supplementary file 1 [file gchron-2020-30-supplement.zip › Supplementary material II-fusion data.xls]

## Sheet: Summary
40Ar/39Ar total fusion analyses on Milos
Sample-ID	Irr-ID	Material	Latitude	Longitude	Petrology	Age ± σ (Ma)		MSWD	39ArK(%)	N	Ntot	40Ar* (%)	K/Ca ± σ		Inverse isochron age (Ma)		40Ar/36Ar ± σ	MSWD
G15M0033	VU108-Z19	Biotite	36.6662	24.4652	Rhyolite	0.412 ± 0.004		1.1016	77.2422	8	10	22.2205	20.5 ± 2.7		0.39 ± 0.02	0.01	303.32 ± 3.06	0.89
G15M0034	VU108-Z20	Biotite	36.755	24.4244	Rhyolite	0.51 ± 0.02		0.952202	56.9156	6	10	3.53232	13.7 ± 1.2	1.2	0.61 ± 0.08	0.08	296.45 ± 1.65	0.92
G15M0035	VU108-Z21	Biotite	36.755	24.4244	Rhyolite	0.63 ± 0.02		1.26365	73.4303	6	9	4.87358	17.7 ± 1.1	0.8	0.77 ± 0.13	0.16	294.99 ± 3.17	1.42
G15M0013	VU108-Z13	Biotite	36.6716	24.4406	Rhyolite	1.04 ± 0.01		1.61596	82.401	9	10	26.3033	*15.2 ± 0.2	1.01	1.02 ± 0.04	0.04	299.77 ± 4.06	1.85707
G15M0022	VU108-Z14	Biotite	36.7402	24.3397	enclave	2.10 ± 0.01		1.37398	100	10	10	36.0386	*11.7 ± 0.2	0.37	2.08 ± 0.06	0.05	299.44 ± 4.63	1.59
G15M0023	VU108-Z3	Biotite	36.7263	24.342	Rhyolite	2.10 ± 0.01		1.72	55.58	6	11	35.9256	*76.1 ± 2.4	0.5	2.13 ± 0.06	0.06	296.12 ± 4.63	2.08
G15M0024	VU108-Z15	Biotite	36.7277	24.3415	Rhyolite	2.13 ± 0.01		0.46	63.67	6	10	29.7357	22.5 ± 3.2	3.1	2.09 ± 0.03	0.04	300.50 ± 1.58	0.23
G15M0025	VU108-Z2	Biotite	36.6876	24.3515	Dacite	2.36 ± 0.01		0.7	84.62	9	10	37.6195	43.2 ± 2.7	2.7	2.34 ± 0.04	0.04	300.57 ± 3.49	0.78
G15M0026	VU108-Z1b	Biotite	36.6848	24.35	Dacite	2.35 ± 0.01		1.36	95.23	9	10	38.5649	12.8 ± 2.3	2.5	2.42 ± 0.04	0.04	292.01 ± 2.92	0.93
G15M0006	VU108-Z11	Biotite	36.7643	24.5157	Dacite	2.72 ± 0.01		1.95	87.67	9	10	47.904	*28.3 ± 0.5	0.07	2.62 ± 0.04	0.05	310.21 ± 4.04	0.99
The age in bold is used as eruption age (see text for discussion). G15M0022 is the enclave from G15M0021 (in Table of step-heating).
40Ar* (%) is average radiogenic 40Ar in analyses included in the weighted mean.
*The K/Ca ratio is calibrated by removing the step with excess 37Ar (Ca) (>1).
						21

## Sheet: G15M0033
	Relative Abundances			36Ar [A]	%1s	37Ar [A]	%1s	38Ar [A]	%1s	39Ar [A]	%1s	40Ar [A]	%1s	40(r)/39(k)	± 1s	Age	± 1s	40Ar(r)	39Ar(k)	K/Ca	± 1s		Normal Isochron			39(k)/36(a)	± 1s	40(a+r)/36(a)	± 1s	r.i.		Inverse Isochron			39(k)/40(a+r)	± 1s	36(a)/40(a+r)	± 1s	r.i.		Degassing Patterns			36Ar(a) [A]	%1s	36Ar(c) [A]	%1s	36Ar(ca) [A]	%1s
																(Ma)		(%)	(%)
	106_VU108-Z19	8		0.0460524	0.636138	0.319334	2.12944	0.339909	0.247454	25.7018	0.0545795	16.3323	0.0544949	0.100679	0.00346666	0.360953	0.0124274	15.8435	9.1312	34.6084	0.737209		106_VU108-Z19	8		559.184	3.57725	354.858	2.27045	0.992576		106_VU108-Z19	8		1.5758	0.00122844	0.00281803	1.80303e-05	0.0621164		106_VU108-Z19	8		0.0459626	0.637394	0	0	8.43043e-05	2.22354
	133_VU108-Z19	8		0.029532	0.908085	0.500918	1.32585	0.496452	0.25769	38.3551	0.0490619	12.9282	0.0975042	0.107413	0.00212844	0.385093	0.00763	31.8668	13.6266	32.9246	0.436829		133_VU108-Z19	8		1304.92	11.9235	438.725	4.02696	0.992622		133_VU108-Z19	8		2.97434	0.00331104	0.00227933	2.09214e-05	0.0977221		133_VU108-Z19	8		0.0293925	0.912421	0	0	0.000132242	1.47223
	137_VU108-Z19	8	4	0.00895024	2.6306	0.117852	5.94193	0.134729	0.406395	10.2583	0.073748	3.79826	0.200156	0.10989	0.0068988	0.393971	0.0247305	29.6786	3.64451	37.4285	2.22415		137_VU108-Z19	8	4	1150.45	30.3903	424.982	11.2546	0.996712		137_VU108-Z19	8	4	2.70705	0.00580872	0.00235304	6.23145e-05	0.071455		137_VU108-Z19	8	4	0.0089167	2.64058	0	0	3.11129e-05	5.9763
	139_VU108-Z19	8	4	0.0599793	0.449911	1.25508	0.83427	0.659221	0.200085	50.3805	0.0500973	23.526	0.0706687	0.11269	0.00167629	0.404009	0.00600906	24.132	17.8988	17.2604	0.144258		139_VU108-Z19	8	4	844.764	3.84615	393.757	1.80449	0.98146		139_VU108-Z19	8	4	2.1454	0.00188816	0.00253964	1.16386e-05	0.129817		139_VU108-Z19	8	4	0.0596376	0.452528	0	0	0.000331342	1.05148
	105_VU108-Z19	8	4	0.0135406	1.42501	0.187395	3.12016	0.209104	0.370911	16.0458	0.0614483	5.8594	0.132933	0.113346	0.00363379	0.406359	0.0130262	31.0391	5.70068	36.8186	1.14902		105_VU108-Z19	8	4	1189.65	17.0353	433.402	6.2278	0.994685		105_VU108-Z19	8	4	2.74491	0.00406175	0.00230733	3.31554e-05	0.0852189		105_VU108-Z19	8	4	0.0134877	1.43064	0	0	4.94724e-05	3.18512
	134_VU108-Z19	8	4	0.0773553	0.702602	0.308696	1.72539	0.393771	0.192437	29.2	0.0475926	26.4285	0.040361	0.114199	0.00563013	0.409419	0.0201825	12.6174	10.3741	40.6741	0.702055		134_VU108-Z19	8	4	377.909	2.66433	341.717	2.40778	0.996018		134_VU108-Z19	8	4	1.10591	0.000695632	0.0029264	2.06197e-05	0.038164		134_VU108-Z19	8	4	0.0772667	0.70341	0	0	8.14958e-05	1.84027
	131_VU108-Z19	8	4	0.0563088	0.667175	0.367122	2.44707	0.501222	0.163837	38.4272	0.0573686	21.2051	0.04172	0.114281	0.00296454	0.409711	0.0106271	20.7095	13.6523	45.0085	1.10169		131_VU108-Z19	8	4	683.693	4.58677	376.693	2.52327	0.994219		131_VU108-Z19	8	4	1.81499	0.00130844	0.00265468	1.77823e-05	0.0394671		131_VU108-Z19	8	4	0.056205	0.668423	0	0	9.69201e-05	2.52938
	138_VU108-Z19	8	4	0.0452768	0.728409	0.356556	1.44002	0.370011	0.213325	27.8942	0.0540638	16.8136	0.115856	0.118372	0.00363464	0.424378	0.0130291	19.638	9.91011	33.6396	0.484757		138_VU108-Z19	8	4	617.448	4.51996	371.649	2.74757	0.984788		138_VU108-Z19	8	4	1.66138	0.00213523	0.00269071	1.98922e-05	0.143081		138_VU108-Z19	8	4	0.0451762	0.73004	0	0	9.41308e-05	1.57583
	135_VU108-Z19	8	4	0.0391507	0.54812	0.234763	2.45623	0.311025	0.248612	23.6751	0.0562436	14.5191	0.116482	0.119527	0.00284715	0.428516	0.0102062	19.4901	8.4112	43.364	1.0654		135_VU108-Z19	8	4	605.744	3.34337	370.963	2.08273	0.972879		135_VU108-Z19	8	4	1.6329	0.0021227	0.00269569	1.51346e-05	0.188198		135_VU108-Z19	8	4	0.0390841	0.54907	0	0	6.19773e-05	2.53824
	107_VU108-Z19	8	4	0.0346125	1.33888	0.438181	1.53238	0.285178	0.304342	21.5343	0.0628224	12.97	0.094072	0.123227	0.00647012	0.441781	0.0231932	20.4593	7.65057	21.132	0.324094		107_VU108-Z19	8	4	624.321	8.3974	375.493	5.05762	0.996425		107_VU108-Z19	8	4	1.66267	0.00189251	0.00266316	3.58709e-05	0.0587627		107_VU108-Z19	8	4	0.034492	1.34358	0	0	0.00011568	1.66066
			S	0.410759	0.258717	4.0859	0.545613	3.70062	0.0774182	281.472	0.0181477	154.38	0.0262269																														S	0.409621	0.25944	0	0	0.00107868	0.600857
	Information on Analysis and Constants Used in Calculations									Results		40(a)/36(a)	± 1s	40(r)/39(k)	± 1s	Age	± 1s	MSWD	39Ar(k)	K/Ca	± 1s
																(Ma)			(%,n)
	Sample = 106_VU108-Z19				Age Equations = Min et al. (2000)					Age Plateau				0.114815	0.00115842	0.411627	0.0041819	1.1016	77.2422	20.5498	2.65542
	Material = Biotite				Negative Intensities = Allowed										0.0100895		0.0101594	0.358745	8
	Location = Milos				Decay Constant 40K = 5.460 ± 0.053 E-10 1/a					Full External Error							0.0061138	1.53452	1σ Confidence Limit
	Analyst = Xiaolong Zhou				Decay Constant 39Ar = 2.940 ± 0.016 E-07 1/h					Analytical Error							0.00415263	1.04957	Error Magnification
	Project = VU108				Decay Constant 37Ar = 8.230 ± 0.012 E-04 1/h
	Mass Discrimination Law = LIN				Decay Constant 36Cl = 2.257 ± 0.015 E-06 1/a					Total Fusion Age				0.113128	0.00114784	0.405577	0.00414338		10	29.6218	0.16171
	Irradiation = VU108				Decay Activity 40K(EC,β⁺) = 3.310 ± 0.030 1/gs										0.0101464		0.010216
	J = 0.00195770 ± 0.00000235				Decay Activity 40K(β⁻) = 27.890 ± 0.150 1/gs					Full External Error							0.00603966
	25.552 = 1.500 ± 0.005 Ma				Atmospheric Ratio 40/36(a) = 298.56 ± 0.31					Analytical Error							0.0041147
	IGSN = Undefined				Atmospheric Ratio 38/36(a) = 0.1885 ± 0.0003
	Preferred Age = Undefined				Production Ratio 39/37(ca) = 0.000673 ± 0.000004					Normal Isochron		303.325	3.0645	0.108279	0.00431166	0.388196	0.0154633	0.886794	77.2422
	Classification = Undefined				Production Ratio 36/37(ca) = 0.000264 ± 0.000002								0.010103		0.03982		0.0398338	0.503379	8
	Experiment Type = Undefined				Production Ratio 40/39(k) = 0.000860 ± 0.000070					Full External Error							0.0160251	1.57735	1σ Confidence Limit
	Extraction Method = Undefined				Production Ratio 38/39(k) = 0.012110 ± 0.000030					Analytical Error							0.0154563	1	Error Magnification
	Heating = 90 sec				Production Ratio 36/38(cl) = 262.80 ± 1.71												6		Number of Iterations
	Isolation = 3.00 min				Scaling Ratio K/Ca = 0.430												1.02172e-06		Convergence
	Instrument = HELIX				Abundance Ratio 40K/K = 1.1700 ± 0.0100 E-04
	Lithology = Undefined				Atomic Weight K = 39.0983 ± 0.0001 g					Inverse Isochron		303.417	3.07573	0.108191	0.00429991	0.38788	0.0154212	0.891428	77.2422
	Lat-Lon = Undefined - Undefined												0.010137		0.0397438		0.0397577	0.499945	8
	Feature = Undefined									Full External Error							0.0159836	1.57735	1σ Confidence Limit
										Analytical Error							0.0154142	1	Error Magnification
																	2		Number of Iterations
																	0.00178041		Convergence
																	0.177324		Spreading Factor
[truncated: 124 more columns]

## Sheet: G15M0034
	Relative Abundances			36Ar [A]	%1s	37Ar [A]	%1s	38Ar [A]	%1s	39Ar [A]	%1s	40Ar [A]	%1s	40(r)/39(k)	± 1s	Age	± 1s	40Ar(r)	39Ar(k)	K/Ca	± 1s		Normal Isochron			39(k)/36(a)	± 1s	40(a+r)/36(a)	± 1s	r.i.		Inverse Isochron			39(k)/40(a+r)	± 1s	36(a)/40(a+r)	± 1s	r.i.		Degassing Patterns			36Ar(a) [A]	%1s	36Ar(c) [A]	%1s	36Ar(ca) [A]	%1s
																(Ma)		(%)	(%)
	130_VU108-Z20	8		0.436578	0.286513	0.326294	2.01719	0.378182	0.220921	21.2922	0.0707718	132.4	0.0352252	0.0970174	0.0187873	0.347826	0.0673498	1.56019	11.772	28.0593	0.566357		130_VU108-Z20	8		48.781	0.143995	303.293	0.875716	0.963572		130_VU108-Z20	8		0.160838	0.000127166	0.00329715	9.52006e-06	0.0544233		130_VU108-Z20	8		0.436481	0.286577	0	0	8.61415e-05	2.11628
	129_VU108-Z20	8	4	0.340927	0.282885	0.592602	1.69646	0.300081	0.213885	16.7786	0.0726646	103.829	0.0182807	0.123764	0.0183189	0.443705	0.0656672	1.99996	9.27643	12.1745	0.206726		129_VU108-Z20	8	4	49.2374	0.143873	304.654	0.864046	0.966562		129_VU108-Z20	8	4	0.161618	0.000121116	0.00328241	9.30944e-06	0.0157873		129_VU108-Z20	8	4	0.340762	0.283023	0	0	0.000156447	1.81317
	123_VU108-Z20	8	4	0.18093	0.314772	0.401889	1.83146	0.238452	0.271263	14.7202	0.0630725	55.9413	0.028947	0.132077	0.012215	0.473504	0.0437858	3.47535	8.13841	15.7495	0.288617		123_VU108-Z20	8	4	81.408	0.261503	309.312	0.978369	0.9764		123_VU108-Z20	8	4	0.263191	0.000182722	0.00323298	1.02261e-05	0.0383277		123_VU108-Z20	8	4	0.180816	0.314972	0	0	0.000106099	1.94006
	122_VU108-Z20	8	4	0.268349	0.278384	0.325828	1.83276	0.275241	0.293496	16.2148	0.0725854	82.2977	0.0155592	0.135285	0.0147049	0.485005	0.052711	2.66543	8.96479	21.3986	0.392492		122_VU108-Z20	8	4	60.4447	0.173951	306.737	0.85555	0.96615		122_VU108-Z20	8	4	0.197057	0.000146312	0.00326012	9.09311e-06	0.0117848		122_VU108-Z20	8	4	0.268255	0.278482	0	0	8.60185e-05	1.94129
	151_VU108-Z20	8	4	0.290293	0.284741	0.509398	2.03504	0.333888	0.247364	20.2931	0.0763326	89.5502	0.0445754	0.143187	0.0130955	0.513328	0.0469412	3.24472	11.2196	17.1298	0.348843		151_VU108-Z20	8	4	69.9391	0.206274	308.574	0.889791	0.954296		151_VU108-Z20	8	4	0.226652	0.000200393	0.00324071	9.34476e-06	0.0780643		151_VU108-Z20	8	4	0.29015	0.284883	0	0	0.000134481	2.1333
	149_VU108-Z20	8	4	0.0953783	0.561662	0.10424	4.76321	0.172719	0.407689	11.442	0.0927022	30.1863	0.0988225	0.149439	0.0144539	0.53574	0.0518096	5.66437	6.32604	47.1988	2.2486		149_VU108-Z20	8	4	120.003	0.683357	316.493	1.80556	0.971724		149_VU108-Z20	8	4	0.379166	0.000513949	0.00315963	1.80253e-05	0.126464		149_VU108-Z20	8	4	0.0953463	0.561852	0	0	2.75194e-05	4.80601
	145_VU108-Z20	8	4	0.293824	0.299296	0.800302	0.918005	0.378162	0.211593	23.4962	0.0550623	91.4688	0.0246576	0.16133	0.0118686	0.578364	0.0425417	4.1441	12.9904	12.6241	0.116098		145_VU108-Z20	8	4	80.0252	0.243711	311.47	0.936101	0.980184		145_VU108-Z20	8	4	0.256927	0.000155084	0.00321058	9.64915e-06	0.0337063		145_VU108-Z20	8	4	0.293603	0.299523	0	0	0.00021128	1.11908
	147_VU108-Z20	8		0.0810069	0.743574	0.165487	3.48783	0.115105	0.484969	7.40077	0.107373	25.6498	0.198615	0.198895	0.0254848	0.713005	0.0913408	5.73864	4.09171	19.2298	0.671019		147_VU108-Z20	8		91.4108	0.687146	316.741	2.43914	0.95624		147_VU108-Z20	8		0.288598	0.00065175	0.00315715	2.43124e-05	0.226967		147_VU108-Z20	8		0.0809604	0.744004	0	0	4.36887e-05	3.54606
	146_VU108-Z20	8		0.639115	0.247752	1.1099	0.744407	0.689303	0.243387	41.0523	0.0475795	199.443	0.0166441	0.211619	0.0125152	0.758609	0.0448552	4.35576	22.6968	15.9043	0.118635		146_VU108-Z20	8		64.2632	0.1622	312.159	0.775515	0.979847		146_VU108-Z20	8		0.205867	0.000103816	0.00320349	7.95862e-06	0.0222838		146_VU108-Z20	8		0.638803	0.247873	0	0	0.000293013	0.981704
	150_VU108-Z20	8		0.166146	0.473111	0.222546	3.17013	0.145548	0.317747	8.18247	0.079122	51.5514	0.0331972	0.23937	0.0294413	0.858067	0.105513	3.79932	4.52388	15.8098	0.501346		150_VU108-Z20	8		49.2664	0.23641	310.353	1.47249	0.983892		150_VU108-Z20	8		0.158743	0.000136225	0.00322214	1.52876e-05	0.0271049		150_VU108-Z20	8		0.166083	0.473291	0	0	5.87521e-05	3.23409
			S	2.79255	0.105067	4.55848	0.524508	3.02668	0.0895075	180.873	0.0221623	862.318	0.0115639																														S	2.79126	0.105116	0	0	0.00120344	0.577198
	Information on Analysis and Constants Used in Calculations									Results		40(a)/36(a)	± 1s	40(r)/39(k)	± 1s	Age	± 1s	MSWD	39Ar(k)	K/Ca	± 1s
																(Ma)			(%,n)
	Sample = 130_VU108-Z20				Age Equations = Min et al. (2000)					Age Plateau				0.14287	0.00558811	0.512192	0.0200402	0.952202	56.9156	13.6508	1.19825
	Material = Biotite				Negative Intensities = Allowed										0.0391133		0.0391263	0.445738	6
	Location = Milos				Decay Constant 40K = 5.460 ± 0.053 E-10 1/a					Full External Error							0.0207943	1.63246	1σ Confidence Limit
	Analyst = Xiaolong Zhou				Decay Constant 39Ar = 2.940 ± 0.016 E-07 1/h					Analytical Error							0.0200307	1	Error Magnification
	Project = VU108				Decay Constant 37Ar = 8.230 ± 0.012 E-04 1/h
	Mass Discrimination Law = LIN				Decay Constant 36Cl = 2.257 ± 0.015 E-06 1/a					Total Fusion Age				0.159252	0.00517755	0.570915	0.0185711		10	17.0614	0.0895681
	Irradiation = VU108				Decay Activity 40K(EC,β⁺) = 3.310 ± 0.030 1/gs										0.0325116		0.0325287
	J = 0.00195770 ± 0.00000235				Decay Activity 40K(β⁻) = 27.890 ± 0.150 1/gs					Full External Error							0.0195741
	25.552 = 1.500 ± 0.005 Ma				Atmospheric Ratio 40/36(a) = 298.56 ± 0.31					Analytical Error							0.0185585
	IGSN = Undefined				Atmospheric Ratio 38/36(a) = 0.1885 ± 0.0003
	Preferred Age = Undefined				Production Ratio 39/37(ca) = 0.000673 ± 0.000004					Normal Isochron		296.448	1.65185	0.171307	0.0229909	0.614123	0.0824103	0.923324	56.9156
	Classification = Undefined				Production Ratio 36/37(ca) = 0.000264 ± 0.000002								0.00557213		0.134209		0.134192	0.449102	6
	Experiment Type = Undefined				Production Ratio 40/39(k) = 0.000860 ± 0.000070					Full External Error							0.0826785	1.70711	1σ Confidence Limit
	Extraction Method = Undefined				Production Ratio 38/39(k) = 0.012110 ± 0.000030					Analytical Error							0.082407	1	Error Magnification
	Heating = 90 sec				Production Ratio 36/38(cl) = 262.80 ± 1.71												4		Number of Iterations
	Isolation = 3.00 min				Scaling Ratio K/Ca = 0.430												5.04733e-07		Convergence
	Instrument = HELIX				Abundance Ratio 40K/K = 1.1700 ± 0.0100 E-04
	Lithology = Undefined				Atomic Weight K = 39.0983 ± 0.0001 g					Inverse Isochron Clustered Points		296.439	1.65356	0.171519	0.0222283	0.614885	0.0796769	0.925492	56.9156
	Lat-Lon = Undefined - Undefined												0.00557809		0.129596		0.12958	0.44784	6
	Feature = Undefined									Full External Error							0.0799549	1.70711	1σ Confidence Limit
										Analytical Error							0.0796735	1	Error Magnification
																	2		Number of Iterations
																	0.00723201		Convergence
																	0.0373137		Spreading Factor
[truncated: 124 more columns]

## Sheet: G15M0035
	Relative Abundances			36Ar [A]	%1s	37Ar [A]	%1s	38Ar [A]	%1s	39Ar [A]	%1s	40Ar [A]	%1s	40(r)/39(k)	± 1s	Age	± 1s	40Ar(r)	39Ar(k)	K/Ca	± 1s		Normal Isochron			39(k)/36(a)	± 1s	40(a+r)/36(a)	± 1s	r.i.		Inverse Isochron			39(k)/40(a+r)	± 1s	36(a)/40(a+r)	± 1s	r.i.		Degassing Patterns			36Ar(a) [A]	%1s	36Ar(c) [A]	%1s	36Ar(ca) [A]	%1s
																(Ma)		(%)	(%)
	141_VU108-Z21	8		0.692593	0.247598	0.892538	0.904627	0.843693	0.169931	51.9096	0.0486268	213.518	0.02695	0.130418	0.010755	0.46756	0.0385524	3.17065	11.225	25.0083	0.226559		141_VU108-Z21	8		74.9769	0.189256	308.338	0.768252	0.975486		141_VU108-Z21	8		0.243164	0.000135259	0.00324319	8.08069e-06	0.0526341		141_VU108-Z21	8		0.692334	0.247691	0	0	0.00023563	1.10813
	154_VU108-Z21	8		0.324325	0.366026	1.16285	0.927491	0.544623	0.271549	35.415	0.0572062	101.515	0.0185889	0.134129	0.0104175	0.480862	0.0373425	4.67921	7.65807	13.0955	0.121691		154_VU108-Z21	8		109.302	0.405326	313.221	1.14912	0.986737		154_VU108-Z21	8		0.348963	0.000210085	0.00319264	1.17129e-05	0.015922		154_VU108-Z21	8		0.324002	0.366391	0	0	0.000306992	1.12687
	153_VU108-Z21	8		0.488124	0.269402	0.81165	1.07297	0.579142	0.158884	35.5472	0.0587904	151.006	0.0265401	0.149383	0.0118928	0.535538	0.0426294	3.51645	7.6867	18.8321	0.202365		153_VU108-Z21	8		72.8574	0.200989	309.444	0.838091	0.972305		153_VU108-Z21	8		0.235446	0.000151927	0.00323161	8.75242e-06	0.0404745		153_VU108-Z21	8		0.487894	0.269529	0	0	0.000214276	1.24935
	142_VU108-Z21	8	4	1.0664	0.226154	1.77674	0.739032	1.34544	0.165372	83.3768	0.0449095	331.395	0.00722273	0.157009	0.00950954	0.562874	0.0340863	3.95018	18.0294	20.1783	0.149399		142_VU108-Z21	8	4	78.2215	0.180438	310.841	0.703695	0.980336		142_VU108-Z21	8	4	0.251644	0.000114552	0.00321707	7.28294e-06	0.00536263		142_VU108-Z21	8	4	1.06589	0.226262	0	0	0.000469059	0.977634
	157_VU108-Z21	8	4	0.642699	0.23409	1.05676	0.77566	0.786622	0.211218	48.5918	0.0469547	200.142	0.0176671	0.170922	0.0101413	0.612743	0.0363498	4.1497	10.5075	19.772	0.153644		157_VU108-Z21	8	4	75.6401	0.180674	311.489	0.731597	0.977683		157_VU108-Z21	8	4	0.242834	0.0001219	0.00321039	7.54029e-06	0.0267269		157_VU108-Z21	8	4	0.642399	0.2342	0	0	0.000278984	1.00561
	155_VU108-Z21	8	4	0.473723	0.234084	1.01576	0.892621	0.662276	0.174219	42.1522	0.0472649	148.633	0.0203695	0.171941	0.00862453	0.616396	0.0309131	4.87615	9.11497	17.844	0.159502		155_VU108-Z21	8	4	89.033	0.212743	313.868	0.737965	0.976519		155_VU108-Z21	8	4	0.283664	0.000146109	0.00318605	7.49101e-06	0.0346001		155_VU108-Z21	8	4	0.473437	0.234226	0	0	0.00026816	1.09835
	158_VU108-Z21	8	4	0.500347	0.292502	1.15278	1.08122	0.820941	0.192192	53.5931	0.045358	158.962	0.0134671	0.179676	0.00866253	0.644121	0.0310488	6.05759	11.5889	19.9906	0.216331		158_VU108-Z21	8	4	107.18	0.317453	317.818	0.931246	0.987128		158_VU108-Z21	8	4	0.337237	0.000159766	0.00314646	9.21952e-06	0.0134702		158_VU108-Z21	8	4	0.500022	0.292693	0	0	0.000304333	1.25643
	159_VU108-Z21	8	4	0.71549	0.240909	1.38389	1.01003	0.928302	0.245575	58.2607	0.0701409	224.274	0.0543012	0.184062	0.00984595	0.65984	0.0352902	4.78138	12.5983	18.1024	0.183279		159_VU108-Z21	8	4	81.4708	0.204524	313.556	0.774768	0.936663		159_VU108-Z21	8	4	0.259829	0.000230548	0.00318923	7.88029e-06	0.134699		159_VU108-Z21	8	4	0.715101	0.241041	0	0	0.000365348	1.19572
	143_VU108-Z21	8	4	0.586436	0.311599	1.60617	0.779879	0.8489	0.211764	53.6041	0.0478458	185.04	0.0111285	0.187323	0.0107365	0.67153	0.038482	5.42645	11.5913	14.3504	0.112127		143_VU108-Z21	8	4	91.4747	0.288591	315.695	0.985107	0.987783		143_VU108-Z21	8	4	0.289756	0.000142461	0.00316761	9.88432e-06	0.00834178		143_VU108-Z21	8	4	0.585987	0.311838	0	0	0.00042403	1.00887
			S	5.49013	0.0889359	10.8591	0.303585	7.35994	0.0680028	462.451	0.0177297	1714.48	0.00898434																														S	5.48707	0.0889859	0	0	0.00286681	0.374931
	Information on Analysis and Constants Used in Calculations									Results		40(a)/36(a)	± 1s	40(r)/39(k)	± 1s	Age	± 1s	MSWD	39Ar(k)	K/Ca	± 1s
																(Ma)			(%,n)
	Sample = 141_VU108-Z21				Age Equations = Min et al. (2000)					Age Plateau				0.174744	0.00435778	0.626443	0.0156377	1.26365	73.4303	17.696	1.06823
	Material = Biotite				Negative Intensities = Allowed										0.0249381		0.0249627	0.276471	6
	Location = Milos				Decay Constant 40K = 5.460 ± 0.053 E-10 1/a					Full External Error							0.0170473	1.63246	1σ Confidence Limit
	Analyst = Xiaolong Zhou				Decay Constant 39Ar = 2.940 ± 0.016 E-07 1/h					Analytical Error							0.0156196	1.12412	Error Magnification
	Project = VU108				Decay Constant 37Ar = 8.230 ± 0.012 E-04 1/h
	Mass Discrimination Law = LIN				Decay Constant 36Cl = 2.257 ± 0.015 E-06 1/a					Total Fusion Age				0.164058	0.00342312	0.588139	0.0122901		9	18.3118	0.0556867
	Irradiation = VU108				Decay Activity 40K(EC,β⁺) = 3.310 ± 0.030 1/gs										0.0208654		0.0208965
	J = 0.00195770 ± 0.00000235				Decay Activity 40K(β⁻) = 27.890 ± 0.150 1/gs					Full External Error							0.013844
	25.552 = 2.000 ± 0.006 Ma				Atmospheric Ratio 40/36(a) = 298.56 ± 0.31					Analytical Error							0.0122698
	IGSN = Undefined				Atmospheric Ratio 38/36(a) = 0.1885 ± 0.0003
	Preferred Age = Undefined				Production Ratio 39/37(ca) = 0.000673 ± 0.000004					Normal Isochron		294.99	3.16766	0.215696	0.036844	0.77322	0.132053	1.42485	73.4303
	Classification = Undefined				Production Ratio 36/37(ca) = 0.000264 ± 0.000002								0.0107382		0.170815		0.170783	0.222751	6
	Experiment Type = Undefined				Production Ratio 40/39(k) = 0.000860 ± 0.000070					Full External Error							0.132318	1.70711	1σ Confidence Limit
	Extraction Method = Undefined				Production Ratio 38/39(k) = 0.012110 ± 0.000030					Analytical Error							0.13205	1.19367	Error Magnification
	Heating = 90 sec				Production Ratio 36/38(cl) = 262.80 ± 1.71												4		Number of Iterations
	Isolation = 3.00 min				Scaling Ratio K/Ca = 0.430												3.84015e-07		Convergence
	Instrument = HELIX				Abundance Ratio 40K/K = 1.1700 ± 0.0100 E-04
	Lithology = Undefined				Atomic Weight K = 39.0983 ± 0.0001 g					Inverse Isochron Clustered Points		295.007	3.17136	0.215551	0.0346711	0.772703	0.124265	1.42547	73.4303
	Lat-Lon = Undefined - Undefined												0.0107501		0.160849		0.160819	0.222544	6
	Feature = Undefined									Full External Error							0.124547	1.70711	1σ Confidence Limit
										Analytical Error							0.124262	1.19393	Error Magnification
																	3		Number of Iterations
																	1.01459e-05		Convergence
																	0.0203487		Spreading Factor
[truncated: 124 more columns]

## Sheet: G15M0013
	Relative Abundances			36Ar [A]	%1s	37Ar [A]	%1s	38Ar [A]	%1s	39Ar [A]	%1s	40Ar [A]	%1s	40(r)/39(k)	± 1s	Age	± 1s	40Ar(r)	39Ar(k)	K/Ca	± 1s		Normal Isochron			39(k)/36(a)	± 1s	40(a+r)/36(a)	± 1s	r.i.		Inverse Isochron			39(k)/40(a+r)	± 1s	36(a)/40(a+r)	± 1s	r.i.		Degassing Patterns			36Ar(a) [A]	%1s	36Ar(c) [A]	%1s	36Ar(ca) [A]	%1s
																(Ma)		(%)	(%)
	061_VU108-Z13	8		0.139462	0.402209	2.87815	0.708533	0.505631	0.200857	36.917	0.0498977	50.4752	0.0260044	0.24476	0.00470017	0.874157	0.0167826	17.9005	17.599	5.51516	0.0391735		061_VU108-Z13	8		266.164	1.08472	363.706	1.47425	0.99035		061_VU108-Z13	8		0.731811	0.000413529	0.00274947	1.11447e-05	0.0306952		061_VU108-Z13	8		0.138693	0.404472	0	0	0.000759833	0.954788
	062_VU108-Z13	8	4	0.0604312	0.812039	1.94876	0.750501	0.263178	0.297622	19.2783	0.057174	23.2701	0.0469932	0.278378	0.00768467	0.994191	0.0274374	23.0608	9.19014	4.25351	0.0320152		062_VU108-Z13	8	4	321.756	2.642	388.13	3.18458	0.995908		062_VU108-Z13	8	4	0.828991	0.000615588	0.00257646	2.11397e-05	0.0368446		062_VU108-Z13	8	4	0.0599117	0.819124	0	0	0.000514474	0.986333
	094_VU108-Z13	8	4	0.0658196	0.621209	1.61713	0.817544	0.282825	0.272145	20.8147	0.061531	25.3943	0.0358861	0.281271	0.00596504	1.00452	0.0212975	23.0535	9.92273	5.5344	0.0453741		094_VU108-Z13	8	4	318.311	2.00017	388.092	2.43103	0.993515		094_VU108-Z13	8	4	0.820196	0.000586239	0.00257671	1.61407e-05	0.0295331		094_VU108-Z13	8	4	0.0653876	0.62535	0	0	0.000426923	1.03826
	101_VU108-Z13	8	4	0.049264	1.00121	0.541327	1.92377	0.227912	0.292699	16.7518	0.0564644	19.4195	0.0445485	0.28301	0.00885482	1.01073	0.031615	24.4127	7.98613	13.3064	0.256096		101_VU108-Z13	8	4	341.054	3.43036	395.082	3.97149	0.997423		101_VU108-Z13	8	4	0.86325	0.000623219	0.00253112	2.54436e-05	0.027885		101_VU108-Z13	8	4	0.0491167	1.00422	0	0	0.00014291	2.02744
	102_VU108-Z13	8	4	0.0531539	0.756305	0.276855	2.64277	0.244964	0.334239	18.2377	0.0656643	21.1081	0.0390199	0.287636	0.00666129	1.02725	0.0237831	24.8519	8.6946	28.3258	0.748817		102_VU108-Z13	8	4	343.606	2.61227	397.393	3.01399	0.99491		102_VU108-Z13	8	4	0.864649	0.000662627	0.0025164	1.90854e-05	0.0268583		102_VU108-Z13	8	4	0.053077	0.757411	0	0	7.30898e-05	2.71916
	057_VU108-Z13	8	4	0.044356	0.874354	0.651485	1.45296	0.3091	0.239496	23.2297	0.0557303	19.9424	0.0465006	0.289825	0.00503856	1.03506	0.0179893	33.7594	11.0744	15.3321	0.222933		057_VU108-Z13	8	4	525.803	4.62524	450.951	3.96456	0.996549		057_VU108-Z13	8	4	1.16599	0.000851937	0.00221754	1.94956e-05	0.0347564		057_VU108-Z13	8	4	0.0441787	0.877885	0	0	0.000171992	1.58767
	095_VU108-Z13	8	4	0.104071	0.662804	2.47434	0.757377	0.59259	0.242958	44.1024	0.0486406	43.7492	0.0223309	0.291109	0.00473426	1.03965	0.0169028	29.3448	21.0247	7.66399	0.0581649		095_VU108-Z13	8	4	426.478	2.85254	422.712	2.8216	0.996738		095_VU108-Z13	8	4	1.00891	0.000544719	0.00236568	1.57909e-05	0.0152315		095_VU108-Z13	8	4	0.103407	0.667089	0	0	0.000653226	0.991574
	058_VU108-Z13	8	4	0.0155853	1.38953	0.0650232	9.81188	0.12137	0.520833	9.20694	0.0866135	7.41903	0.116806	0.300173	0.00711017	1.07201	0.0253851	37.251	4.38932	60.8854	5.97424		058_VU108-Z13	8	4	591.467	8.24486	476.102	6.64737	0.994542		058_VU108-Z13	8	4	1.24231	0.00181095	0.00210039	2.93257e-05	0.0675471		058_VU108-Z13	8	4	0.0155662	1.39127	0	0	1.71661e-05	9.83273
	103_VU108-Z13	8	4	0.0234315	0.953964	8.47381	0.544657	0.0903459	0.418419	5.894	0.113467	8.11996	0.144768	0.303707	0.0116069	1.08462	0.0414394	22.0237	2.8072	0.298799	0.00166244		103_VU108-Z13	8	4	277.877	2.95844	382.953	4.09171	0.985102		103_VU108-Z13	8	4	0.725616	0.00133619	0.00261129	2.79006e-05	0.106781		103_VU108-Z13	8	4	0.0211903	1.05858	0	0	0.00223709	0.840387
	059_VU108-Z13	8	4	0.0672005	0.589759	0.232474	2.38901	0.212333	0.304018	15.3373	0.0674756	24.7534	0.033333	0.306203	0.00785534	1.09354	0.0280452	18.9722	7.31184	28.3686	0.677999		059_VU108-Z13	8	4	228.451	1.35741	368.512	2.17899	0.991923		059_VU108-Z13	8	4	0.619927	0.000467376	0.00271361	1.60454e-05	0.025369		059_VU108-Z13	8	4	0.0671353	0.590336	0	0	6.1373e-05	2.47325
			S	0.622774	0.227518	19.1594	0.313554	2.85025	0.092379	209.77	0.0196607	243.651	0.0128508																														S	0.617663	0.22943	0	0	0.00505807	0.450133
	Information on Analysis and Constants Used in Calculations									Results		40(a)/36(a)	± 1s	40(r)/39(k)	± 1s	Age	± 1s	MSWD	39Ar(k)	K/Ca	± 1s			value/variation^2		1/variation^2
																(Ma)			(%,n)
	Sample = 061_VU108-Z13				Age Equations = Min et al. (2000)					Age Plateau Error Mean				0.290114	0.00278901	1.03609	0.00998404	1.61596	82.401	0.324077	0.13715
	Material = Biotite				Negative Intensities = Allowed										0.00961352		0.00963625	0.114363	9					202.888		15.2474
	Location = Milos				Decay Constant 40K = 5.460 ± 0.053 E-10 1/a					Full External Error							0.0150221	1.5	1σ Confidence Limit					50.5161		1.7834
	Analyst = Xiaolong Zhou				Decay Constant 39Ar = 2.940 ± 0.016 E-07 1/h					Analytical Error							0.00995768	1.2712	Error Magnification					308.499		20.1212
	Project = VU108				Decay Constant 37Ar = 8.230 ± 0.012 E-04 1/h
	Mass Discrimination Law = LIN				Decay Constant 36Cl = 2.257 ± 0.015 E-06 1/a					Total Fusion Age				0.28157	0.00205047	1.00559	0.00735469		10	4.70764	0.01479			1.70588		0.0280179
	Irradiation = VU108				Decay Activity 40K(EC,β⁺) = 3.310 ± 0.030 1/gs										0.00728226		0.00731382
	J = 0.00195050 ± 0.00000137				Decay Activity 40K(β⁻) = 27.890 ± 0.150 1/gs					Full External Error							0.0131441							61.7135		2.17542
	25.552 = 1.500 ± 0.005 Ma				Atmospheric Ratio 40/36(a) = 298.56 ± 0.31					Analytical Error							0.00732095						sum	563.609		37.1799	15.1589
	IGSN = Undefined				Atmospheric Ratio 38/36(a) = 0.1885 ± 0.0003																						0.164001
	Preferred Age = Undefined				Production Ratio 39/37(ca) = 0.000673 ± 0.000004					Normal Isochron Error Chron		299.769	4.06334	0.286664	0.0112717	1.02378	0.0402502	1.84604	82.401
	Classification = Undefined				Production Ratio 36/37(ca) = 0.000264 ± 0.000002								0.0135549		0.0393202		0.0393154	0.0740254	9
	Experiment Type = Undefined				Production Ratio 40/39(k) = 0.000860 ± 0.000070					Full External Error							0.0417503	1.53452	1σ Confidence Limit
	Extraction Method = Undefined				Production Ratio 38/39(k) = 0.012110 ± 0.000030					Analytical Error							0.0402438	1.35869	Error Magnification
	Heating = 90 sec				Production Ratio 36/38(cl) = 262.80 ± 1.71												10		Number of Iterations
	Isolation = 3.00 min				Scaling Ratio K/Ca = 0.430												1.52177e-06		Convergence
	Instrument = HELIX				Abundance Ratio 40K/K = 1.1700 ± 0.0100 E-04
	Lithology = Undefined				Atomic Weight K = 39.0983 ± 0.0001 g					Inverse Isochron Error Chron		299.854	4.04555	0.286652	0.0111086	1.02373	0.0396679	1.85707	82.401
	Lat-Lon = Undefined - Undefined												0.0134917		0.0387528		0.0387483	0.0721211	9
	Feature = Undefined									Full External Error							0.0411891	1.53452	1σ Confidence Limit
										Analytical Error							0.0396614	1.36274	Error Magnification
																	3		Number of Iterations
																	0.000244739		Convergence
																	0.178408		Spreading Factor
[truncated: 124 more columns]

## Sheet: G15M0022
	Relative Abundances			36Ar [A]	%1s	37Ar [A]	%1s	38Ar [A]	%1s	39Ar [A]	%1s	40Ar [A]	%1s	40(r)/39(k)	± 1s	Age	± 1s	40Ar(r)	39Ar(k)	K/Ca	± 1s		Normal Isochron			39(k)/36(a)	± 1s	40(a+r)/36(a)	± 1s	r.i.		Inverse Isochron			39(k)/40(a+r)	± 1s	36(a)/40(a+r)	± 1s	r.i.		Degassing Patterns			36Ar(a) [A]	%1s	36Ar(c) [A]	%1s	36Ar(ca) [A]	%1s
																(Ma)		(%)	(%)
	091_VU108-Z14	8	4	0.025552	1.33961	0.733895	1.19158	0.149197	0.350357	10.7754	0.10558	13.679	0.0563855	0.566127	0.00955891	2.02222	0.0341258	44.5935	7.8206	6.31316	0.0755209		091_VU108-Z14	8	4	424.971	5.75501	539.147	7.28539	0.996078		091_VU108-Z14	8	4	0.788227	0.000944619	0.00185478	2.50633e-05	0.0198457		091_VU108-Z14	8	4	0.0253544	1.35009	0	0	0.000193748	1.35257
	086_VU108-Z14	8	4	0.0744018	0.672108	0.550998	1.5056	0.188694	0.245509	13.0709	0.0775002	29.6522	0.0433206	0.571694	0.0116084	2.04209	0.0414421	25.1999	9.48681	10.2002	0.153779		086_VU108-Z14	8	4	176.029	1.19334	399.195	2.69406	0.991383		086_VU108-Z14	8	4	0.440961	0.00039179	0.00250504	1.69059e-05	0.0314789		086_VU108-Z14	8	4	0.0742518	0.673473	0	0	0.000145463	1.63598
	081_VU108-Z14	8	4	0.0331307	0.67589	1.54824	0.897341	0.129793	0.48714	9.1571	0.0904351	15.0893	0.0792253	0.580269	0.00752024	2.0727	0.0268469	35.2103	6.64563	2.54295	0.0229345		081_VU108-Z14	8	4	279.844	1.9323	460.945	3.17652	0.984785		081_VU108-Z14	8	4	0.607109	0.000730589	0.00216946	1.49504e-05	0.0759813		081_VU108-Z14	8	4	0.0327185	0.684544	0	0	0.000408736	1.10219
	085_VU108-Z14	8	4	0.0349954	0.978555	0.125335	4.60743	0.166045	0.46128	11.9202	0.113862	17.3716	0.101809	0.580888	0.00877748	2.07491	0.0313351	39.8595	8.65181	40.8954	1.8848		085_VU108-Z14	8	4	340.981	3.36276	496.632	4.89133	0.987973		085_VU108-Z14	8	4	0.686587	0.00104949	0.00201356	1.98316e-05	0.0690824		085_VU108-Z14	8	4	0.0349582	0.979607	0	0	3.30885e-05	4.65167
	083_VU108-Z14	8	4	0.0395267	0.639122	0.823639	1.13785	0.137768	0.354013	9.71449	0.0692825	17.4199	0.0562103	0.584358	0.00794089	2.0873	0.0283483	32.5858	7.05055	5.07138	0.0578116		083_VU108-Z14	8	4	247.138	1.59769	442.977	2.85819	0.990438		083_VU108-Z14	8	4	0.557902	0.000498327	0.00225745	1.45656e-05	0.0551381		083_VU108-Z14	8	4	0.0393057	0.642755	0	0	0.000217441	1.30549
	089_VU108-Z14	8	4	0.148723	0.439042	0.564289	1.9821	0.542583	0.201546	38.3584	0.0491099	67.0004	0.0208229	0.589529	0.00524381	2.10576	0.0187198	33.7508	27.8409	29.2296	0.579538		089_VU108-Z14	8	4	258.198	1.14191	450.775	1.98359	0.99266		089_VU108-Z14	8	4	0.572786	0.000306415	0.0022184	9.76184e-06	0.0191138		089_VU108-Z14	8	4	0.148561	0.439528	0	0	0.000148972	2.08286
	087_VU108-Z14	8	4	0.0214382	1.00194	0.0598646	9.50978	0.100069	0.51344	7.16618	0.121378	10.635	0.0857248	0.590799	0.00911528	2.1103	0.0325404	39.8095	5.20131	51.4734	4.89541		087_VU108-Z14	8	4	334.556	3.3795	496.216	4.99439	0.989132		087_VU108-Z14	8	4	0.674215	0.00100257	0.00201525	2.02835e-05	0.0493049		087_VU108-Z14	8	4	0.0214198	1.00282	0	0	1.58043e-05	9.5313
	090_VU108-Z14	8	4	0.0498302	0.609994	1.369	0.913744	0.221307	0.257266	15.7592	0.0739565	24.1055	0.0332646	0.591706	0.00588016	2.11353	0.0209914	38.6811	11.4376	4.94962	0.0453748		090_VU108-Z14	8	4	318.587	1.97209	487.07	2.99788	0.991356		090_VU108-Z14	8	4	0.654088	0.000531334	0.00205309	1.26367e-05	0.0225716		090_VU108-Z14	8	4	0.0494629	0.614577	0	0	0.000361416	1.11558
	093_VU108-Z14	8	4	0.0332659	1.05324	1.91495	0.77245	0.121216	0.408666	8.33681	0.0901194	14.7815	0.0534533	0.599193	0.0126573	2.14026	0.0451841	33.7894	6.05007	1.87173	0.0145563		093_VU108-Z14	8	4	254.469	2.73179	451.036	4.83094	0.995219		093_VU108-Z14	8	4	0.564188	0.000591712	0.00221712	2.3747e-05	0.0255978		093_VU108-Z14	8	4	0.0327565	1.06973	0	0	0.000505548	1.00313
	082_VU108-Z14	8	4	0.0471265	0.78374	2.58616	0.750149	0.191947	0.406358	13.524	0.122504	21.993	0.0878831	0.600251	0.00838159	2.14404	0.0299207	36.9059	9.81468	2.24834	0.0170894		082_VU108-Z14	8	4	291.186	2.34365	473.345	3.78837	0.982349		082_VU108-Z14	8	4	0.615167	0.000928089	0.00211263	1.69082e-05	0.0641843		082_VU108-Z14	8	4	0.0464385	0.795485	0	0	0.000682747	0.986065
			S	0.50799	0.234787	10.2764	0.360002	1.94862	0.107032	137.783	0.0274209	231.727	0.0170125					360.386																									S	0.505227	0.236083	0	0	0.00271296	0.439932
	Information on Analysis and Constants Used in Calculations									Results		40(a)/36(a)	± 1s	40(r)/39(k)	± 1s	Age	± 1s	MSWD	39Ar(k)	K/Ca	± 1s			value/variation^2		1/variation^2
																(Ma)			(%,n)					1106.91		175.334
																								431.339		42.2871
	Sample = 091_VU108-Z14				Age Equations = Min et al. (2000)					Age Plateau				0.586731	0.00290613	2.09577	0.0105839	1.37398	100	2.43671	0.38355
	Material = Biotite				Negative Intensities = Allowed										0.00495309		0.00505014	0.193462	10					11.5118		0.281493
	Location = Milos				Decay Constant 40K = 5.460 ± 0.053 E-10 1/a					Full External Error							0.025045	1.4714	1σ Confidence Limit
	Analyst = Xiaolong Zhou				Decay Constant 39Ar = 2.940 ± 0.016 E-07 1/h					Analytical Error							0.0103746	1.17217	Error Magnification					87.028		2.97739
	Project = VU108				Decay Constant 37Ar = 8.230 ± 0.012 E-04 1/h																			2.14785		0.0417274
	Mass Discrimination Law = LIN				Decay Constant 36Cl = 2.257 ± 0.015 E-06 1/a					Total Fusion Age				0.586231	0.00264256	2.09399	0.00966303		10	5.76502	0.0208143
	Irradiation = VU108				Decay Activity 40K(EC,β⁺) = 3.310 ± 0.030 1/gs										0.0045077		0.00461465
	J = 0.00195140 ± 0.00000195				Decay Activity 40K(β⁻) = 27.890 ± 0.150 1/gs					Full External Error							0.0246522
	25.552 = 1.500 ± 0.005 Ma				Atmospheric Ratio 40/36(a) = 298.56 ± 0.31					Analytical Error							0.00943368						sum	532.027		45.5877	11.6704
	IGSN = Undefined				Atmospheric Ratio 38/36(a) = 0.1885 ± 0.0003																						0.148107
	Preferred Age = Undefined				Production Ratio 39/37(ca) = 0.000673 ± 0.000004					Normal Isochron Error Chron		299.436	4.62543	0.583435	0.0166311	2.08401	0.0594082	1.58889	100
	Classification = Undefined				Production Ratio 36/37(ca) = 0.000264 ± 0.000002								0.0154471		0.0285054		0.0285067	0.122183	10
	Experiment Type = Undefined				Production Ratio 40/39(k) = 0.000860 ± 0.000070					Full External Error							0.0635515	1.5	1σ Confidence Limit
	Extraction Method = Undefined				Production Ratio 38/39(k) = 0.012110 ± 0.000030					Analytical Error							0.0593716	1.26051	Error Magnification
	Heating = 90 sec				Production Ratio 36/38(cl) = 262.80 ± 1.71												11		Number of Iterations
	Isolation = 3.00 min				Scaling Ratio K/Ca = 0.430												3.758e-06		Convergence
	Instrument = HELIX				Abundance Ratio 40K/K = 1.1700 ± 0.0100 E-04
	Lithology = Undefined				Atomic Weight K = 39.0983 ± 0.0001 g					Inverse Isochron Error Chron		299.211	4.63736	0.584469	0.0165528	2.0877	0.0591291	1.56434	100
	Lat-Lon = Undefined - Undefined												0.0154986		0.0283212		0.0283226	0.129673	10
	Feature = Undefined									Full External Error							0.063305	1.5	1σ Confidence Limit
										Analytical Error							0.0590923	1.25074	Error Magnification
																	3		Number of Iterations
																	3.82659e-05		Convergence
																	0.202966		Spreading Factor
[truncated: 124 more columns]

## Sheet: G15M0023
	Relative Abundances			36Ar [A]	%1s	37Ar [A]	%1s	38Ar [A]	%1s	39Ar [A]	%1s	40Ar [A]	%1s	40(r)/39(k)	± 1s	Age	± 1s	40Ar(r)	39Ar(k)	K/Ca	± 1s		Normal Isochron			39(k)/36(a)	± 1s	40(a+r)/36(a)	± 1s	r.i.		Inverse Isochron			39(k)/40(a+r)	± 1s	36(a)/40(a+r)	± 1s	r.i.		Degassing Patterns			36Ar(a) [A]	%1s	36Ar(c) [A]	%1s	36Ar(ca) [A]	%1s
																(Ma)		(%)	(%)
	041_VU108-Z3	8		0.0979093	0.434843	0.122572	5.95094	0.390711	0.24761	28.1496	0.0564406	42.4252	0.0239386	0.468264	0.00466492	1.62363	0.0161676	31.0698	16.6811	98.7524	5.87696		041_VU108-Z3	8		287.626	1.26174	433.245	1.8877	0.990133		041_VU108-Z3	8		0.663888	0.000408205	0.00230816	1.00569e-05	0.0222129		041_VU108-Z3	8		0.0978684	0.435029	0	0	3.23591e-05	5.98525
	042_VU108-Z3	8	4	0.0664693	0.429794	0.106934	6.17591	0.248684	0.209812	17.6611	0.0631449	30.3774	0.0426016	0.596076	0.00503707	2.06654	0.0174532	34.6552	10.4658	71.0184	4.38626		042_VU108-Z3	8	4	265.839	1.15543	457.02	1.97501	0.984522		042_VU108-Z3	8	4	0.581679	0.000443774	0.00218809	9.45582e-06	0.0556007		042_VU108-Z3	8	4	0.0664351	0.430024	0	0	2.82304e-05	6.20898
	043_VU108-Z3	8	4	0.0857476	0.547652	0.103492	5.51353	0.267431	0.283324	18.9338	0.062995	36.9213	0.0331554	0.597565	0.00757458	2.0717	0.0262455	30.644	11.22	78.668	4.33767		043_VU108-Z3	8	4	220.894	1.21818	430.558	2.36326	0.991618		043_VU108-Z3	8	4	0.513041	0.000365716	0.00232257	1.27482e-05	0.0284468		043_VU108-Z3	8	4	0.0857143	0.547868	0	0	2.73219e-05	5.55055
	045_VU108-Z3	8	4	0.0489285	0.602601	1.44955	0.764047	0.188676	0.360989	13.362	0.0666287	22.543	0.0516064	0.601686	0.00675358	2.08598	0.0234006	35.6614	7.91764	3.96348	0.0303978		045_VU108-Z3	8	4	275.254	1.68209	464.176	2.82993	0.990443		045_VU108-Z3	8	4	0.592994	0.000500475	0.00215435	1.31344e-05	0.0521429		045_VU108-Z3	8	4	0.0485409	0.607463	0	0	0.000382682	0.996678
	047_VU108-Z3	8	4	0.0444691	0.640153	0.075249	5.35953	0.206079	0.343104	14.8305	0.0672535	22.3169	0.0367319	0.609213	0.00584699	2.11206	0.020259	40.4845	8.78838	84.7465	4.54237		047_VU108-Z3	8	4	333.686	2.14906	501.846	3.21977	0.992874		047_VU108-Z3	8	4	0.664918	0.000510529	0.00199264	1.27845e-05	0.0278561		047_VU108-Z3	8	4	0.0444443	0.640515	0	0	1.98657e-05	5.39761
	049_VU108-Z3	8	4	0.039733	0.845246	0.109089	6.58552	0.220612	0.318478	16.1209	0.0724309	21.7605	0.0404946	0.613744	0.00630664	2.12776	0.0218515	45.4678	9.55302	63.5439	4.18495		049_VU108-Z3	8	4	406.072	3.44785	547.784	4.63953	0.995195		049_VU108-Z3	8	4	0.7413	0.000616432	0.00182554	1.54616e-05	0.0236913		049_VU108-Z3	8	4	0.0396993	0.845977	0	0	2.87995e-05	6.61655
	046_VU108-Z3	8	4	0.066204	0.525439	0.0593608	11.2701	0.184636	0.428809	12.879	0.0737306	27.7062	0.0274946	0.616138	0.00825462	2.13605	0.0286008	28.6407	7.63196	93.2934	10.5145		046_VU108-Z3	8	4	194.594	1.03281	418.457	2.20248	0.988932		046_VU108-Z3	8	4	0.465028	0.00036626	0.00238973	1.2578e-05	0.0185034		046_VU108-Z3	8	4	0.0661839	0.525606	0	0	1.56712e-05	11.2882
	033_VU108-Z3	8		0.0703772	0.688535	0.107386	5.07837	0.321933	0.319508	23.3097	0.0674845	36.4422	0.0467086	0.661569	0.00633543	2.29346	0.0219492	42.3162	13.8131	93.3373	4.74044		033_VU108-Z3	8		331.377	2.29374	517.789	3.57525	0.992933		033_VU108-Z3	8		0.639985	0.000526119	0.00193129	1.33352e-05	0.0388274		033_VU108-Z3	8		0.0703416	0.688886	0	0	2.835e-05	5.11854
	034_VU108-Z3	8		0.0334071	0.78656	0.0448789	13.292	0.161627	0.356241	11.7232	0.0867472	18.2182	0.0609237	0.70277	0.00684396	2.43619	0.0237092	45.2224	6.94704	112.324	14.9304		034_VU108-Z3	8		351.081	2.77953	545.289	4.30401	0.990994		034_VU108-Z3	8		0.643844	0.000683234	0.00183389	1.44751e-05	0.0446028		034_VU108-Z3	8		0.0333917	0.786939	0	0	1.1848e-05	13.3074
	035_VU108-Z3	8		0.0490287	0.789178	0.0564271	10.3938	0.16467	0.362037	11.7837	0.0657807	23.1252	0.0438769	0.719853	0.00993711	2.49537	0.0344235	36.6809	6.9829	89.797	9.33353		035_VU108-Z3	8		240.432	1.90474	471.636	3.72926	0.995		035_VU108-Z3	8		0.509784	0.000403555	0.00212028	1.67652e-05	0.0309851		035_VU108-Z3	8		0.0490103	0.78948	0	0	1.48967e-05	10.4135
	031_VU108-Z3	8		0.41854	0.28702	-0.0126426	56.6634	0.0779208	0.546199	-0.00152943	424.307	123.305	0.0227143	1088.55	4651.46	2048.89	5267.73	-1.3427	-0.000901284	0.0517298	0.222659		031_VU108-Z3	8		-0.00363385	0.0155049	294.604	0.848212	0.00067058		031_VU108-Z3	8		-1.23347e-05	5.26297e-05	0.00339438	9.77296e-06	4.19981e-06		031_VU108-Z3	8		0.418543	0.287018	0	0	-3.33763e-06	56.667
			S	1.02081	0.163388	2.2223	1.02189	2.43298	0.0989243	168.752	0.0219926	405.141	0.0112001																														S	1.02017	0.163492	0	0	0.000586687	1.10668
	Information on Analysis and Constants Used in Calculations									Results		40(a)/36(a)	± 1s	40(r)/39(k)	± 1s	Age	± 1s	MSWD	39Ar(k)	K/Ca	± 1s			value/variation^2		1/variation^2
																(Ma)			(%,n)
																								4.18105		0.0531481
	Sample = 041_VU108-Z3				Age Equations = Min et al. (2000)					Age Plateau Error Mean				0.604679	0.00340896	2.09635	0.0119613	1.71801	55.5768	3.97787	0.455157
	Material = Biotite				Negative Intensities = Allowed										0.00563764		0.00570576	0.126577	6					4.10729		0.0484656
	Location = Milos				Decay Constant 40K = 5.460 ± 0.053 E-10 1/a					Full External Error							0.0256629	1.63246	1σ Confidence Limit					3.62822		0.0570978
	Analyst = Xiaolong Zhou				Decay Constant 39Ar = 2.940 ± 0.016 E-07 1/h					Analytical Error							0.0118117	1.31073	Error Magnification					0.843871		0.00904535
	Project = VU108				Decay Constant 37Ar = 8.230 ± 0.012 E-04 1/h
	Mass Discrimination Law = LIN				Decay Constant 36Cl = 2.257 ± 0.015 E-06 1/a					Total Fusion Age				0.595036	0.00308653	2.06294	0.0108545		11	32.6521	0.333745
	Irradiation = VU108				Decay Activity 40K(EC,β⁺) = 3.310 ± 0.030 1/gs										0.00518712		0.00526166
	J = 0.00189400 ± 0.00000170				Decay Activity 40K(β⁻) = 27.890 ± 0.150 1/gs					Full External Error							0.0248403
	25.552 = 1.500 ± 0.005 Ma				Atmospheric Ratio 40/36(a) = 298.56 ± 0.31					Analytical Error							0.0106947						sum	12.7604		0.167757	76.065
	IGSN = Undefined				Atmospheric Ratio 38/36(a) = 0.1885 ± 0.0003																						2.44152
	Preferred Age = Undefined				Production Ratio 39/37(ca) = 0.000673 ± 0.000004					Normal Isochron Error Chron		296.121	4.6329	0.613252	0.0171029	2.12605	0.0592897	2.08134	55.5768
	Classification = Undefined				Production Ratio 36/37(ca) = 0.000264 ± 0.000002								0.0156453		0.0278889		0.0278872	0.080361	6
	Experiment Type = Undefined				Production Ratio 40/39(k) = 0.000860 ± 0.000070					Full External Error							0.0636042	1.70711	1σ Confidence Limit
	Extraction Method = Undefined				Production Ratio 38/39(k) = 0.012110 ± 0.000030					Analytical Error							0.0592589	1.44269	Error Magnification
	Heating = 90 sec				Production Ratio 36/38(cl) = 262.80 ± 1.71												12		Number of Iterations
	Isolation = 3.00 min				Scaling Ratio K/Ca = 0.430												3.71751e-06		Convergence
	Instrument = HELIX				Abundance Ratio 40K/K = 1.1700 ± 0.0100 E-04
	Lithology = Undefined				Atomic Weight K = 39.0983 ± 0.0001 g					Inverse Isochron Error Chron		296.199	4.61957	0.613111	0.016985	2.12557	0.0588814	2.09352	55.5768
	Lat-Lon = Undefined - Undefined												0.0155962		0.027703		0.0277015	0.0787969	6
	Feature = Undefined									Full External Error							0.0632218	1.70711	1σ Confidence Limit
										Analytical Error							0.0588504	1.4469	Error Magnification
																	3		Number of Iterations
																	2.39611e-05		Convergence
																	0.169385		Spreading Factor
[truncated: 124 more columns]

## Sheet: G15M0024
	Relative Abundances			36Ar [A]	%1s	37Ar [A]	%1s	38Ar [A]	%1s	39Ar [A]	%1s	40Ar [A]	%1s	40(r)/39(k)	± 1s	Age	± 1s	40Ar(r)	39Ar(k)	K/Ca	± 1s		Normal Isochron			39(k)/36(a)	± 1s	40(a+r)/36(a)	± 1s	r.i.		Inverse Isochron			39(k)/40(a+r)	± 1s	36(a)/40(a+r)	± 1s	r.i.		Degassing Patterns			36Ar(a) [A]	%1s	36Ar(c) [A]	%1s	36Ar(ca) [A]	%1s
																(Ma)		(%)	(%)
	114_VU108-Z15	8		0.219669	0.352858	0.676123	1.28508	0.476238	0.143108	31.9674	0.0609531	77.1786	0.0244246	0.363626	0.00757333	1.29913	0.0270478	15.0611	11.9666	20.3303	0.261554		114_VU108-Z15	8		145.65	0.521996	351.522	1.24447	0.983048		114_VU108-Z15	8		0.414341	0.000272355	0.00284477	1.00712e-05	0.026012		114_VU108-Z15	8		0.219477	0.353168	0	0	0.000178496	1.43563
	109_VU108-Z15	8		0.171232	0.345463	0.287739	2.46603	0.400257	0.260407	27.544	0.0526389	66.2311	0.0222731	0.548577	0.00672397	1.95956	0.0240057	22.8139	10.3109	41.1617	1.01529		109_VU108-Z15	8		160.937	0.562673	386.846	1.33991	0.986519		109_VU108-Z15	8		0.416023	0.000238107	0.00258501	8.95361e-06	0.0254664		109_VU108-Z15	8		0.171147	0.345637	0	0	7.59632e-05	2.54773
	115_VU108-Z15	8		0.11725	0.407609	0.366554	1.55302	0.323118	0.245524	22.46	0.0644327	47.8822	0.0296256	0.57383	0.00659735	2.04971	0.0235525	26.9162	8.40771	26.3473	0.409532		115_VU108-Z15	8		191.726	0.791893	408.578	1.67135	0.985129		115_VU108-Z15	8		0.469252	0.00033316	0.00244751	1.00119e-05	0.0306125		115_VU108-Z15	8		0.117145	0.407976	0	0	9.67701e-05	1.67973
	110_VU108-Z15	8		0.0463003	0.70905	0.117832	4.51822	0.211783	0.302454	15.0747	0.0799714	22.5459	0.0647944	0.578488	0.00665902	2.06634	0.0237724	38.6788	5.64311	55.0113	2.48592		110_VU108-Z15	8		325.842	2.32688	487.056	3.47071	0.989567		110_VU108-Z15	8		0.669004	0.000689443	0.00205315	1.46306e-05	0.0575313		110_VU108-Z15	8		0.0462636	0.70962	0	0	3.11077e-05	4.56332
	118_VU108-Z15	8	4	0.0930626	0.658322	0.718959	1.28925	0.418436	0.310871	29.9117	0.0601733	45.3952	0.0265772	0.589898	0.00621444	2.10708	0.0221848	38.8688	11.1971	17.8895	0.230893		118_VU108-Z15	8	4	322.104	2.1339	488.568	3.22602	0.995034		118_VU108-Z15	8	4	0.659281	0.000434785	0.0020468	1.3515e-05	0.0167236		118_VU108-Z15	8	4	0.0928621	0.65975	0	0	0.000189805	1.43937
	121_VU108-Z15	8	4	0.0729135	0.599464	0.329698	2.11905	0.285744	0.276559	20.3536	0.0770812	33.8506	0.025291	0.594106	0.00653719	2.1221	0.0233368	35.7219	7.61919	26.5454	0.562882		121_VU108-Z15	8	4	279.505	1.69149	464.616	2.79137	0.990951		121_VU108-Z15	8	4	0.601583	0.00048871	0.00215232	1.29309e-05	0.0134789		121_VU108-Z15	8	4	0.0728195	0.600244	0	0	8.70402e-05	2.21358
	117_VU108-Z15	8	4	0.178484	0.35364	0.544353	1.37398	0.613116	0.187664	43.3361	0.0493148	79.0416	0.0172706	0.594511	0.00455332	2.12355	0.0162547	32.595	16.2225	34.2321	0.470647		117_VU108-Z15	8	4	243.016	0.868478	443.035	1.57011	0.989198		117_VU108-Z15	8	4	0.548524	0.000287394	0.00225716	7.99933e-06	0.016865		117_VU108-Z15	8	4	0.178325	0.353957	0	0	0.000143709	1.51573
	113_VU108-Z15	8	4	0.0850289	0.610741	0.11795	7.32769	0.227934	0.368879	15.9395	0.0679389	34.9107	0.0489155	0.597361	0.00993361	2.13372	0.0354613	27.2741	5.96684	58.109	4.25823		113_VU108-Z15	8	4	187.539	1.15294	410.588	2.51679	0.990689		113_VU108-Z15	8	4	0.456756	0.000382708	0.00243553	1.49291e-05	0.0468211		113_VU108-Z15	8	4	0.0849926	0.611008	0	0	3.11388e-05	7.35558
	119_VU108-Z15	8	4	0.260153	0.29524	0.367972	1.60801	0.487052	0.180395	32.9191	0.0494962	97.3419	0.0231299	0.59767	0.00742318	2.13482	0.0264995	20.2119	12.323	38.4679	0.618859		119_VU108-Z15	8	4	126.589	0.379112	374.219	1.10873	0.983205		119_VU108-Z15	8	4	0.338276	0.000184996	0.00267223	7.91724e-06	0.0333805		119_VU108-Z15	8	4	0.260045	0.295364	0	0	9.71446e-05	1.73069
	111_VU108-Z15	8	4	0.179362	0.334221	0.598615	1.75371	0.405178	0.267475	27.6299	0.05182	70.188	0.0225064	0.603131	0.00681517	2.15432	0.0243287	23.7422	10.343	19.8469	0.348209		111_VU108-Z15	8	4	154.188	0.52197	391.556	1.31291	0.985951		111_VU108-Z15	8	4	0.393783	0.00022275	0.00255392	8.56344e-06	0.0271208		111_VU108-Z15	8	4	0.179194	0.334538	0	0	0.000158034	1.86684
			S	1.42345	0.130877	4.12579	0.592306	3.84886	0.0774431	267.136	0.0189375	574.566	0.00859871																														S	1.42227	0.130987	0	0	0.00108921	0.633865
	Information on Analysis and Constants Used in Calculations									Results		40(a)/36(a)	± 1s	40(r)/39(k)	± 1s	Age	± 1s	MSWD	39Ar(k)	K/Ca	± 1s
																(Ma)			(%,n)
	Sample = 114_VU108-Z15				Age Equations = Min et al. (2000)					Age Plateau				0.595481	0.0026052	2.12701	0.00954002	0.45593	63.6716	22.5275	3.16089
	Material = Biotite				Negative Intensities = Allowed										0.00437496		0.00448518	0.809251	6
	Location = Milos				Decay Constant 40K = 5.460 ± 0.053 E-10 1/a					Full External Error							0.0249341	1.63246	1σ Confidence Limit
	Analyst = Xiaolong Zhou				Decay Constant 39Ar = 2.940 ± 0.016 E-07 1/h					Analytical Error							0.00930017	1	Error Magnification
	Project = VU108				Decay Constant 37Ar = 8.230 ± 0.012 E-04 1/h
	Mass Discrimination Law = LIN				Decay Constant 36Cl = 2.257 ± 0.015 E-06 1/a					Total Fusion Age				0.560406	0.00217112	2.00179	0.00800513		10	27.8413	0.16499
	Irradiation = VU108				Decay Activity 40K(EC,β⁺) = 3.310 ± 0.030 1/gs										0.00387419		0.00399898
	J = 0.00195140 ± 0.00000195				Decay Activity 40K(β⁻) = 27.890 ± 0.150 1/gs					Full External Error							0.0231119
	25.552 = 1.500 ± 0.005 Ma				Atmospheric Ratio 40/36(a) = 298.56 ± 0.31					Analytical Error							0.00775109
	IGSN = Undefined				Atmospheric Ratio 38/36(a) = 0.1885 ± 0.0003
	Preferred Age = Undefined				Production Ratio 39/37(ca) = 0.000673 ± 0.000004					Normal Isochron Overestimated Error		300.502	1.585	0.586256	0.00800085	2.09408	0.0286389	0.228694	63.6716
	Classification = Undefined				Production Ratio 36/37(ca) = 0.000264 ± 0.000002								0.00527449		0.0136474		0.0136761	0.922431	6
	Experiment Type = Undefined				Production Ratio 40/39(k) = 0.000860 ± 0.000070					Full External Error							0.0365319	1.70711	1σ Confidence Limit
	Extraction Method = Undefined				Production Ratio 38/39(k) = 0.012110 ± 0.000030					Analytical Error							0.0285623	1	Error Magnification
	Heating = 90 sec				Production Ratio 36/38(cl) = 262.80 ± 1.71												7		Number of Iterations
	Isolation = 3.00 min				Scaling Ratio K/Ca = 0.430												5.44083e-06		Convergence
	Instrument = HELIX				Abundance Ratio 40K/K = 1.1700 ± 0.0100 E-04
	Lithology = Undefined				Atomic Weight K = 39.0983 ± 0.0001 g					Inverse Isochron Overestimated Error		300.504	1.58633	0.586254	0.00800704	2.09407	0.0286609	0.228721	63.6716
	Lat-Lon = Undefined - Undefined												0.00527891		0.013658		0.0136867	0.922416	6
	Feature = Undefined									Full External Error							0.0365492	1.70711	1σ Confidence Limit
										Analytical Error							0.0285844	1	Error Magnification
																	2		Number of Iterations
																	0.00218435		Convergence
																	0.188191		Spreading Factor
[truncated: 124 more columns]

## Sheet: G15M0025
	Relative Abundances			36Ar [A]	%1s	37Ar [A]	%1s	38Ar [A]	%1s	39Ar [A]	%1s	40Ar [A]	%1s	40(r)/39(k)	± 1s	Age	± 1s	40Ar(r)	39Ar(k)	K/Ca	± 1s		Normal Isochron			39(k)/36(a)	± 1s	40(a+r)/36(a)	± 1s	r.i.		Inverse Isochron			39(k)/40(a+r)	± 1s	36(a)/40(a+r)	± 1s	r.i.		Degassing Patterns			36Ar(a) [A]	%1s	36Ar(c) [A]	%1s	36Ar(ca) [A]	%1s
																(Ma)		(%)	(%)
	053_VU108-Z2	8	4	0.0451651	0.835059	0.153423	3.21196	0.213539	0.259486	13.9306	0.0765381	22.8276	0.0352649	0.670912	0.00818251	2.32582	0.028348	40.9423	9.42673	39.0431	1.2544	1	053_VU108-Z2	8	4	308.779	2.59218	505.723	4.23165	0.994937		053_VU108-Z2	8	4	0.610569	0.000515241	0.00197737	1.65457e-05	0.0178868		053_VU108-Z2	8	4	0.0451147	0.835998	0	0	4.05037e-05	3.2751
	015_VU108-Z2	8	4	0.0885675	0.511989	0.187992	3.04152	0.399367	0.21002	26.1678	0.0548676	44.0982	0.0289454	0.674616	0.00531508	2.33866	0.0184137	40.0314	17.7076	59.8544	1.82078	2	015_VU108-Z2	8	4	295.68	1.52368	498.03	2.55598	0.992699		015_VU108-Z2	8	4	0.593699	0.000369159	0.00200791	1.03049e-05	0.0268178		015_VU108-Z2	8	4	0.0885001	0.512382	0	0	4.96298e-05	3.10812
	054_VU108-Z2	8	4	0.0237063	0.908096	-0.000450819	1320.9	0.077779	0.534501	4.93277	0.127541	10.425	0.0927757	0.677926	0.0132893	2.35012	0.0460398	32.0773	3.338	-4704.98	62148	3	054_VU108-Z2	8	4	208.11	1.90872	439.643	4.01391	0.985147		054_VU108-Z2	8	4	0.473361	0.000746832	0.00227457	2.07667e-05	0.0598787		054_VU108-Z2	8	4	0.0237027	0.908258	0	0	-1.19016e-07	1320.9
	055_VU108-Z2	8	4	0.0441714	0.731257	0.161188	2.88254	0.231628	0.312795	15.2089	0.0549519	23.5643	0.0329159	0.682451	0.00643615	2.3658	0.0222973	44.0466	10.2918	40.5725	1.16973	4	055_VU108-Z2	8	4	344.729	2.53101	533.82	3.91237	0.996169		055_VU108-Z2	8	4	0.645777	0.00041474	0.00187329	1.37293e-05	0.0234739		055_VU108-Z2	8	4	0.0441182	0.732145	0	0	4.25535e-05	2.95274
	050_VU108-Z2	8	4	0.0578543	0.585971	0.131473	3.01909	0.203307	0.308317	13.2346	0.0761755	26.3134	0.0558817	0.683221	0.0078638	2.36847	0.0272432	34.3629	8.95574	43.2851	1.30723	5	050_VU108-Z2	8	4	228.927	1.35374	454.968	2.68014	0.987175		050_VU108-Z2	8	4	0.503172	0.000475772	0.00219796	1.29478e-05	0.0563327		050_VU108-Z2	8	4	0.0578108	0.586414	0	0	3.47089e-05	3.08618
	012_VU108-Z2	8	4	0.039569	0.980257	0.0743839	9.56998	0.139664	0.469536	8.94035	0.0867486	17.9224	0.0465274	0.683287	0.0130729	2.3687	0.0452894	34.0847	6.04989	51.6823	4.94619	6	012_VU108-Z2	8	4	226.091	2.22642	453.045	4.44902	0.994986		012_VU108-Z2	8	4	0.499048	0.00049161	0.00220729	2.16761e-05	0.0225219		012_VU108-Z2	8	4	0.0395429	0.980916	0	0	1.96374e-05	9.59136
	013_VU108-Z2	8	4	0.0547803	0.752925	0.233904	3.28792	0.315634	0.249883	20.8637	0.0489064	30.62	0.0250217	0.683947	0.00597931	2.37098	0.0207146	46.6021	14.1183	38.3547	1.26121	7	013_VU108-Z2	8	4	381.388	2.88163	559.409	4.22024	0.997333		013_VU108-Z2	8	4	0.681769	0.000375979	0.0017876	1.34859e-05	0.0156086		013_VU108-Z2	8	4	0.0547043	0.753981	0	0	6.17507e-05	3.34963
	051_VU108-Z2	8	4	0.0404964	0.795693	0.0489408	8.48421	0.120595	0.357923	7.80995	0.0845796	17.4446	0.0494143	0.685364	0.0124855	2.37589	0.0432545	30.6836	5.28496	68.619	5.82207	8	051_VU108-Z2	8	4	192.94	1.54454	430.794	3.43597	0.992483		051_VU108-Z2	8	4	0.44787	0.000438985	0.00232129	1.85144e-05	0.0313826		051_VU108-Z2	8	4	0.0404785	0.79605	0	0	1.29204e-05	8.50832
	011_VU108-Z2	8	4	0.0583435	0.73638	0.0892591	5.81688	0.214739	0.291048	13.9538	0.0564169	27.1125	0.0356981	0.694531	0.00931812	2.40765	0.0322808	35.7447	9.44244	67.2211	3.91035	9	011_VU108-Z2	8	4	239.3	1.76832	464.761	3.42842	0.9959		011_VU108-Z2	8	4	0.514887	0.000344292	0.00215164	1.58721e-05	0.0261189		011_VU108-Z2	8	4	0.0583106	0.7368	0	0	2.35644e-05	5.85198
	016_VU108-Z2	8		0.100997	0.502285	0.194208	3.29408	0.348074	0.289298	22.7348	0.0527644	52.6498	0.0216031	0.989513	0.00684179	3.42927	0.0236888	42.7281	15.3845	50.3373	1.65836	10	016_VU108-Z2	8		225.249	1.13836	521.447	2.62335	0.993599		016_VU108-Z2	8		0.43197	0.000246647	0.00191774	9.64794e-06	0.016574		016_VU108-Z2	8		0.100931	0.502616	0	0	5.12709e-05	3.35567
			S	0.553651	0.219718	1.27432	1.4141	2.26432	0.0961932	147.777	0.0207985	272.978	0.0117183																														S	0.553214	0.219893	0	0	0.000336421	1.43274
	Information on Analysis and Constants Used in Calculations									Results		40(a)/36(a)	± 1s	40(r)/39(k)	± 1s	Age	± 1s	MSWD	39Ar(k)	K/Ca	± 1s
																(Ma)			(%,n)
	Sample = 053_VU108-Z2				Age Equations = Min et al. (2000)					Age Plateau				0.680706	0.00259884	2.35976	0.00925018	0.704821	84.6155	43.244	2.6862
	Material = Biotite				Negative Intensities = Allowed										0.00381785		0.00391997	0.687644	9
	Location = Milos				Decay Constant 40K = 5.460 ± 0.053 E-10 1/a					Full External Error							0.0271789	1.5	1σ Confidence Limit
	Analyst = Xiaolong Zhou				Decay Constant 39Ar = 2.940 ± 0.016 E-07 1/h					Analytical Error							0.0090034	1	Error Magnification
	Project = VU108				Decay Constant 37Ar = 8.230 ± 0.012 E-04 1/h
	Mass Discrimination Law = LIN				Decay Constant 36Cl = 2.257 ± 0.015 E-06 1/a					Total Fusion Age				0.72869	0.0025035	2.52598	0.00896494		10	49.8649	0.705214
	Irradiation = VU108				Decay Activity 40K(EC,β⁺) = 3.310 ± 0.030 1/gs										0.00343561		0.00354909
	J = 0.00189400 ± 0.00000170				Decay Activity 40K(β⁻) = 27.890 ± 0.150 1/gs					Full External Error							0.0287872
	25.552 = 1.500 ± 0.005 Ma				Atmospheric Ratio 40/36(a) = 298.56 ± 0.31					Analytical Error							0.00867232
	IGSN = Undefined				Atmospheric Ratio 38/36(a) = 0.1885 ± 0.0003
	Preferred Age = Undefined				Production Ratio 39/37(ca) = 0.000673 ± 0.000004					Normal Isochron		300.57	3.48985	0.673563	0.0124498	2.33501	0.0431828	0.775508	84.6155
	Classification = Undefined				Production Ratio 36/37(ca) = 0.000264 ± 0.000002								0.0116108		0.0184835		0.0184936	0.607815	9
	Experiment Type = Undefined				Production Ratio 40/39(k) = 0.000860 ± 0.000070					Full External Error							0.0500426	1.53452	1σ Confidence Limit
	Extraction Method = Undefined				Production Ratio 38/39(k) = 0.012110 ± 0.000030					Analytical Error							0.0431317	1	Error Magnification
	Heating = 90 sec				Production Ratio 36/38(cl) = 262.80 ± 1.71												10		Number of Iterations
	Isolation = 3.00 min				Scaling Ratio K/Ca = 0.430												3.85714e-06		Convergence
	Instrument = HELIX				Abundance Ratio 40K/K = 1.1700 ± 0.0100 E-04
	Lithology = Undefined				Atomic Weight K = 39.0983 ± 0.0001 g					Inverse Isochron		300.564	3.48258	0.673689	0.012392	2.33545	0.0429828	0.776467	84.6155
	Lat-Lon = Undefined - Undefined												0.0115868		0.0183943		0.0184045	0.607003	9
	Feature = Undefined									Full External Error							0.0498725	1.53452	1σ Confidence Limit
										Analytical Error							0.0429314	1	Error Magnification
																	2		Number of Iterations
																	0.00423479		Convergence
																	0.157575		Spreading Factor
[truncated: 124 more columns]

## Sheet: G15M0026
	Relative Abundances			36Ar [A]	%1s	37Ar [A]	%1s	38Ar [A]	%1s	39Ar [A]	%1s	40Ar [A]	%1s	40(r)/39(k)	± 1s	Age	± 1s	40Ar(r)	39Ar(k)	K/Ca	± 1s		Normal Isochron			39(k)/36(a)	± 1s	40(a+r)/36(a)	± 1s	r.i.		Inverse Isochron			39(k)/40(a+r)	± 1s	36(a)/40(a+r)	± 1s	r.i.		Degassing Patterns			36Ar(a) [A]	%1s	36Ar(c) [A]	%1s	36Ar(ca) [A]	%1s
																(Ma)		(%)	(%)
	023_VU108-Z16	8	4	0.0506725	0.724641	0.0263898	24.131	0.147104	0.370562	9.40814	0.10204	21.2059	0.0449904	0.645503	0.0118342	2.23779	0.0410012	28.6382	8.7815	153.298	36.9926		023_VU108-Z16	8	4	185.714	1.3594	418.439	3.03888	0.988323		023_VU108-Z16	8	4	0.443826	0.00049517	0.00238983	1.7356e-05	0.0251185		023_VU108-Z16	8	4	0.0506592	0.72484	0	0	6.96691e-06	24.1395
	025_VU108-Z16	8	4	0.0230046	1.22675	0.0214961	30.1446	0.0801757	0.660147	5.19268	0.178964	10.3144	0.0757583	0.663314	0.0163971	2.2995	0.0568078	33.3939	4.84681	103.872	31.3125		025_VU108-Z16	8	4	225.813	2.80062	448.345	5.51287	0.987649		025_VU108-Z16	8	4	0.503659	0.00097903	0.00223043	2.74254e-05	0.0240847		025_VU108-Z16	8	4	0.0229955	1.22726	0	0	5.67496e-06	30.1514
	024_VU108-Z16	8	4	0.0455044	0.577106	0.074592	7.69674	0.208561	0.239671	13.685	0.0767536	22.7967	0.0386749	0.672841	0.00588019	2.33251	0.0203716	40.3909	12.7735	78.8895	6.07222		024_VU108-Z16	8	4	300.931	1.75311	501.039	2.89998	0.989039		024_VU108-Z16	8	4	0.600614	0.000516876	0.00199585	1.15519e-05	0.0304117		024_VU108-Z16	8	4	0.0454754	0.577483	0	0	1.96923e-05	7.7233
	021_VU108-Z16	8	4	0.0399826	0.751562	0.0873236	5.06921	0.166026	0.374834	10.9067	0.0735704	19.2878	0.0460397	0.673928	0.00835894	2.33628	0.028959	38.1084	10.1802	53.7065	2.72278		021_VU108-Z16	8	4	272.991	2.06306	482.536	3.63618	0.993375		021_VU108-Z16	8	4	0.565741	0.000491574	0.00207238	1.56166e-05	0.0326415		021_VU108-Z16	8	4	0.0399524	0.752136	0	0	2.30534e-05	5.10945
	020_VU108-Z16	8	4	0.0466444	0.685368	0.0708004	8.87424	0.209194	0.339843	13.7665	0.0857969	23.2434	0.0457735	0.676549	0.00707921	2.34535	0.0245254	40.0702	12.8495	83.6094	7.42004		020_VU108-Z16	8	4	295.312	2.041	498.353	3.42531	0.990042		020_VU108-Z16	8	4	0.592576	0.000576828	0.00200661	1.3792e-05	0.0316024		020_VU108-Z16	8	4	0.0466166	0.685787	0	0	1.86913e-05	8.89728
	028_VU108-Z16	8	4	0.0471267	0.594864	0.275703	2.72273	0.133615	0.279473	8.55495	0.114292	19.8641	0.041745	0.67916	0.0100096	2.3544	0.0346772	29.249	7.98498	13.3424	0.363598		028_VU108-Z16	8	4	181.83	1.10322	422.052	2.52109	0.979681		028_VU108-Z16	8	4	0.430824	0.000524407	0.00236938	1.41533e-05	0.0241088		028_VU108-Z16	8	4	0.0470482	0.595872	0	0	7.27856e-05	2.79694
	027_VU108-Z16	8	4	0.0280177	0.742637	0.1252	5.17428	0.15857	0.327464	10.5791	0.0939641	15.5754	0.0550866	0.681843	0.00601926	2.36369	0.0208531	46.3118	9.87444	36.3337	1.88032		027_VU108-Z16	8	4	378.123	2.83453	556.38	4.14935	0.989379		027_VU108-Z16	8	4	0.679612	0.000741054	0.00179733	1.34041e-05	0.0376352		027_VU108-Z16	8	4	0.0279778	0.743721	0	0	3.30529e-05	5.21371
	029_VU108-Z16	8	4	0.0630144	0.694358	0.287212	2.99334	0.343305	0.256603	22.954	0.0714098	34.4656	0.0432937	0.682209	0.00581201	2.36496	0.0201351	45.4345	21.425	34.3652	1.02896		029_VU108-Z16	8	4	364.785	2.54993	547.42	3.81403	0.992822		029_VU108-Z16	8	4	0.666372	0.000557427	0.00182675	1.27275e-05	0.0325665		029_VU108-Z16	8	4	0.0629241	0.695365	0	0	7.58241e-05	3.061
	019_VU108-Z16	8	4	0.0192743	1.12129	0.283949	2.2373	0.105341	0.583455	6.97641	0.144484	10.5237	0.0961526	0.686179	0.00945388	2.37872	0.0327517	45.4873	6.51157	10.5645	0.236852		019_VU108-Z16	8	4	363.446	4.12588	547.949	6.19232	0.988258		019_VU108-Z16	8	4	0.663285	0.00115179	0.00182499	2.0624e-05	0.0472751		019_VU108-Z16	8	4	0.0191946	1.12598	0	0	7.49626e-05	2.32704
	017_VU108-Z16	8		0.0183632	1.59012	0.0209459	32.5475	0.0777064	0.595854	5.11311	0.138337	9.25248	0.151351	0.736972	0.0173351	2.55467	0.0600492	40.7264	4.77254	104.967	34.1645		017_VU108-Z16	8		278.576	4.44865	503.863	8.05231	0.991756		017_VU108-Z16	8		0.552881	0.00113416	0.00198467	3.17173e-05	0.0699864		017_VU108-Z16	8		0.0183544	1.59092	0	0	5.52972e-06	32.5538
			S	0.381605	0.251519	1.27361	1.63503	1.6296	0.114756	107.137	0.0310619	186.529	0.0176622																														S	0.381198	0.251792	0	0	0.000336234	1.6561
	Information on Analysis and Constants Used in Calculations									Results		40(a)/36(a)	± 1s	40(r)/39(k)	± 1s	Age	± 1s	MSWD	39Ar(k)	K/Ca	± 1s
																(Ma)			(%,n)
	Sample = 023_VU108-Z1B				Age Equations = Min et al. (2000)					Age Plateau				0.676758	0.00298303	2.34608	0.0105477	1.35631	95.2275	12.8026	2.31132
	Material = Biotite				Negative Intensities = Allowed										0.00440782		0.00449589	0.210316	9
	Location = Milos				Decay Constant 40K = 5.460 ± 0.053 E-10 1/a					Full External Error							0.0275107	1.5	1σ Confidence Limit
	Analyst = Xiaolong Zhou				Decay Constant 39Ar = 2.940 ± 0.016 E-07 1/h					Analytical Error							0.0103345	1.16461	Error Magnification
	Project = VU108				Decay Constant 37Ar = 8.230 ± 0.012 E-04 1/h
	Mass Discrimination Law = LIN				Decay Constant 36Cl = 2.257 ± 0.015 E-06 1/a					Total Fusion Age				0.677895	0.00272642	2.35002	0.00967905		10	36.1714	0.591521
	Irradiation = VU108				Decay Activity 40K(EC,β⁺) = 3.310 ± 0.030 1/gs										0.00402189		0.00411871
	J = 0.00189400 ± 0.00000170				Decay Activity 40K(β⁻) = 27.890 ± 0.150 1/gs					Full External Error							0.0272293
	25.552 = 1.500 ± 0.005 Ma				Atmospheric Ratio 40/36(a) = 298.56 ± 0.31					Analytical Error							0.00944545
	IGSN = Undefined				Atmospheric Ratio 38/36(a) = 0.1885 ± 0.0003
	Preferred Age = Undefined				Production Ratio 39/37(ca) = 0.000673 ± 0.000004					Normal Isochron		292.012	2.91903	0.698617	0.0100994	2.4218	0.0350549	0.925778	95.2275
	Classification = Undefined				Production Ratio 36/37(ca) = 0.000264 ± 0.000002								0.00999627		0.0144563		0.0144747	0.484898	9
	Experiment Type = Undefined				Production Ratio 40/39(k) = 0.000860 ± 0.000070					Full External Error							0.0437807	1.53452	1σ Confidence Limit
	Extraction Method = Undefined				Production Ratio 38/39(k) = 0.012110 ± 0.000030					Analytical Error							0.0349871	1	Error Magnification
	Heating = 90 sec				Production Ratio 36/38(cl) = 262.80 ± 1.71												11		Number of Iterations
	Isolation = 3.00 min				Scaling Ratio K/Ca = 0.430												4.9017e-06		Convergence
	Instrument = HELIX				Abundance Ratio 40K/K = 1.1700 ± 0.0100 E-04
	Lithology = Undefined				Atomic Weight K = 39.0983 ± 0.0001 g					Inverse Isochron		292.188	2.9173	0.698115	0.0100732	2.42007	0.0349642	0.925522	95.2275
	Lat-Lon = Undefined - Undefined												0.00998434		0.0144291		0.0144476	0.485097	9
	Feature = Undefined									Full External Error							0.0436969	1.53452	1σ Confidence Limit
										Analytical Error							0.0348964	1	Error Magnification
																	3		Number of Iterations
																	6.10504e-05		Convergence
																	0.173683		Spreading Factor
[truncated: 124 more columns]

[truncated: 2 more sheets: G15M0006, Hidden Data]
