# Supplementary material for: Eruptive history and 40Ar/39Ar geochronology of the Milos volcanicfield, Greece
Source: Copernicus journal article supplement (doi:10.5194/gchron-2020-30), 2020-10-13
Supplement: Supplementary file 1 [file gchron-2020-30-supplement.zip › Supplementary material II-incremental data.xls]

## Sheet: Summary
40Ar/39Ar ahalyses on Milos in total fusion and/or incremental
Sample-ID	Irr-ID	Heating	Material	Latitude	Longitude	Petrology	Age ± 𝞼 (Ma)		MSWD	39ArK(%)	n/ntotal	40Ar* (%)	K/Ca ± σ		Inverse isochron age (Ma)		40Ar/36Ar ± σ	MSWD
G15M0012	VU110-Z24	total fusion	Biotite	36.6795	24.4828	Rhyolite	1.12 ± 0.11		2.26	60.49	14/23	7.32157	14.9 ± 0.8		0.26 ± 0.07		316.75 ± 19.49	2.29
	VU110-Z24a	incremental					0.05 ± 0.01		3.09	38.89	3/11	2.8892	40.0 ± 6.0		0.14 ± 0.03		285.98 ± 4.76	0.07
	VU110-Z24b						0.09 ± 0.02		8.16	48.04	4/11	4.58614	30.1 ± 7.1		0.09 ± 0.05		297.46 ± 10.29	12.78
	Combined (Z24a&b)						0.07 ± 0.01		7.44	43.53	7/22	3.85888	32.3 ± 5.0		0.09 ± 0.03		295.67 ± 7.39	9.02
G15M0008	VU110-Z22	total fusion	Biotite	36.6729	24.467	Rhyolite	0.71 ± 0.06		0.41	25.78	8/23	10.8047	17.5 ± 1.8		0.64 ± 0.20		302.75 ± 12.62	0.46
	VU110-Z22a	incremental					0.05 ± 0.01		0.04	16.24	3/15	1.2025	60.9 ± 10.6		0.05 ± 0.10		298.08 ± 8.77	0.08
	VU110-Z22b						0.062 ± 0.003		0.91	71.81	8/11	2.69313	57.3 ± 8.4		0.06 ± 0.02		299.39 ± 3.66	1.09
	Combined (Z22a&b)						0.061 ± 0.004		0.82	41.37	11/26	2.2866	58.0 ± 6.3		0.07 ± 0.01		296.78 ± 1.78	0.83
G15M0009	VU110-Z23	total fusion	Biotite	36.6716	24.4891	Rhyolite	0.65 ± 0.07		1.16	79.91	19/23	5.87285	12.0 ± 0.5		0.28 ± 0.07		309.57 ± 16.01	1.22
	VU110-Z23a	incremental					0.11 ± 0.02		1.37	18.33	4/12	1.65123	45.4 ± 7.3		0.76 ± 0.30		268.52 ± 17.08	0.9
	VU110-Z23b						0.11 ± 0.03		6.77	41.05	4/11	3.13002	19.4 ± 3.7		0.29 ± 0.14		285.17 ± 15.80	8.09
	Combined (Z23a&b)						0.11 ± 0.02		3.5	29.5	8/21	2.39063	19.7 ± 2.6		0.15 ± 0.05		295.78 ± 4.34	4.04
G15M0007	VU110-Z12	total fusion	Biotite	36.7671	24.4124	Rhyolite	0.47 ± 0.05		0.75	72.65	15/22	9.09022	14.8 ± 0.5		0.55 ± 0.12		293.95 ± 11.30	0.8
	VU110-Z12a	incremental					0.30 ± 0.01		4.61	56.5	8/16	14.5076	38.3 ± 2.4		0.28 ± 0.05		301.42 ± 9.01	5.47
	VU110-Z12b						0.317 ± 0.004		1.29	74.05	4/11	18.2957	32.0 ± 2.5		0.31 ± 0.03		299.52 ± 6.40	2.04
	Combined (Z12a&b)						0.31 ± 0.01		5.57	65.27	12/27	15.7703	33.1 ± 1.6		0.34 ± 0.03		293.05 ± 5.50	5.84
G15M0020	VU108-Z5a	incremental	Groundmass	36.7234	24.3952	inclusion	1.49 ± 0.02		17.19	66.87	4/12	32.7615	5.84 ± 0.26		1.52 ± 0.03		295.06 ± 3.82	20.64
	VU108-Z5a_5						1.52 ± 0.01		1.06	61.82	8/12	18.2972	1.51 ± 0.05		1.49 ± 0.02		300.03 ± 0.86	0.95
	VU108-Z5b_1						1.56 ± 0.01		1.94	41.54	3/10	47.9392	1.73 ± 0.06		1.58 ± 0.02		294.97 ± 3.74	2.17
	VU108-Z5b_2						1.52 ± 0.01		1.73	62.45	5/10	22.9474	1.56 ± 0.08		1.53 ± 0.02		298.12 ± 0.89	2.34
	Combined (Z5)						1.52 ± 0.01		9.47	59.7	20/44	26.7989	1.60 ± 0.08		1.52 ± 0.01		298.04 ± 1.00	10.84
G15M0019	VU108-Z6a	incremental	Groundmass	36.7212	24.395	Dacite	1.46 ± 0.01		12.16	73.86	4/12	43.266	3.33 ± 0.09		1.47 ± 0.05		298.36 ± 7.80	19.76
	VU108-Z6a_4						1.62 ± 0.01		3.8	89.75	9/11	34.2815	0.91 ± 0.05		1.62 ± 0.02		297.66 ± 1.36	4.4
	VU108-Z6a_5						1.55 ± 0.01		4.5	95.41	10/12	35.2609	0.88 ± 0.06		1.55 ± 0.01		298.73 ± 1.29	5.4
	VU108-Z6b_1						1.56 ± 0.01		4.05	56.64	4/10	53.1894	1.02 ± 0.01		1.48 ± 0.02		315.46 ± 5.20	0.44
	Combined (Z6)						1.55 ± 0.01		32.15	80.97	27/45	38.7764	0.93 ± 0.04		1.53 ± 0.02		300.60 ± 2.27	34.25
G15M0032B	VU108-Z18	incremental	Obsidian	36.7084	24.5324	Obsidian	1.825 ± 0.002		0.91	98.64	12/13	93.8631	1.83 ± 0.04		1.82 ± 0.003		301.52 ± 3.34	0.93
G15M0021	VU110-Z4	total fusion	Biotite	36.7402	24.3397	Dacite	2.48 ± 0.04		1.49	87.08	4/12	36.0903	13.00± 0.60		3.44 ± 0.46		228.58 ± 36.66	1.39
	VU110-Z4_2	incremental					1.97 ± 0.01		1.66	63.83	4/12	54.718	107.55 ± 20.64		1.97 ± 0.03		299.16 ± 5.36	2.56
	VU110-Z4_2b						2.01 ± 0.01		6.76	75.39	6/16	57.8404	54.43 ± 8.29		2.04 ± 0.05		293.08 ± 10.44	8.15
	Combined (Z4)						1.99 ± 0.01		9.08	69.12	10/28	56.5914	73.52 ± 6.46		2.00 ± 0.04		295.64 ± 7.89	10.3
G15M0004	VU108-Z10_1	incremental	Amphibole	36.7282	24.4315	Andesite	2.99 ± 0.11		1	87.31	4/12	16.3555	0.030 ± 0.002		7.89 ± 2.46		202.39 ± 48.47	0.01
	VU108-Z10_2						2.86 ± 0.09		1.5	86.18	7/11	17.5764	0.029 ± 0.002		0.70 ± 0.29		348.91 ± 27.33	1
	Combined (Z10)						2.90 ± 0.07		1.31	86.74	11/23	17.1324	0.029 ± 0.001		1.95 ± 0.45		319.51 ± 14.70	1.17
G15M0026	VU108-Z1_1	incremental	Amphibole	36.6848	24.35	Dacite	2.70 ± 0.09		0.74	84.69	3/12	38.0758	0.051 ± 0.001		2.30 ± 0.46		324.24 ± 29.12	0.62
	VU108-Z1_2						2.67 ± 0.07		1.38	62.48	6/12	33.4186	0.050 ± 0.001		2.28 ± 0.44		321.76 ± 30.20	1.49
	Combined (Z1)						2.68 ± 0.05		1.06	71.36	9/24	34.971	0.050 ± 0.001		2.31 ± 0.28		321.07 ± 18.37	0.98
G15M0016	VU108-Z8a	incremental	Groundmass	36.6668	24.3398	Basaltic Andesite	2.71 ± 0.02		2.31	79.64	8/12	16.5651	0.24 ± 0.05		2.65 ± 0.10		299.84 ± 2.32	2.92
	VU108-Z8a_4						2.61 ± 0.03		0.93	57.41	7/12	16.8561	0.12 ± 0.07		2.69 ± 0.10		296.44 ± 2.49	0.69
	VU108-Z8b_1						2.67 ± 0.01		1.5	65.57	7/11	17.248	0.11 ± 0.04		2.55 ± 0.05		301.53 ± 1.14	0.71
	Combined (Z8)						2.66 ± 0.01		2.51	67.27	22/35	16.875	0.14 ± 0.02		2.61 ± 0.05		300.01 ± 1.18	2.78
G15M0029	VU108-Z16a	incremental	Groundmass	36.7465	24.52	Andesite	2.67 ± 0.01		0.96	23.61	4/13	56.341	0.53 ± 0.05		2.68 ± 0.02		296.64 ± 3.18	1.25
	VU108-Z16b_1						2.69 ± 0.01		1.32	27.08	3/13	55.7757	0.55 ± 0.04		2.67 ± 0.03		301.16 ± 4.72	2.13
	Combined (Z16)						2.68 ± 0.01		1.66	25.3	7/26	56.0987	0.54 ± 0.03		2.67 ± 0.02		300.00 ± 2.94	1.98
G15M0015	VU108-Z9a	incremental	Groundmass	36.6629	24.3596	Dacite	3.12 ± 0.02		9.07	43.07	3/12	42.7349	1.31 ± 0.05		3.06 ± 0.02		304.19 ± 1.25	0.01	lower temperature steps
	VU108-Z9b_1						3.18 ± 0.01		4.28	33.26	3/14	38.7056	1.30 ±0.01		3.19 ± 0.05		297.79 ± 3.48	9.57
	Combined (Z9)						3.15 ± 0.02		12.96	38.82	6/26	40.7203	1.31 ± 0.02		3.11 ± 0.22		301.15 ± 14.71	38.82
G15M0015	VU108-Z9a	incremental	Groundmass	36.6629	24.3596	Dacite	3.01 ± 0.02		5.75	19.58	2/12	46.6054	1.05 ± 0.06		-		-	-	higher temperature steps
	VU108-Z9b_1						2.98 ± 0.02		4.53	27	4/14	39.3494	0.98 ± 0.06		3.04 ± 0.02		293.83 ± 1.38	1.14
	Combined (Z9)						2.99 ± 0.02		5.54	22.79	6/26	41.7681	1.00 ± 0.04		3.06 ± 0.02		292.77 ± 1.62	1.9
G15M0017	VU108-Z7a	incremental	Groundmass	36.6596	24.3675	Dacite	3.64 ± 0.08		3.13	28.62	7/13	9.76792	1.04 ± 0.02		4.14 ± 0.49		293.87 ± 4.77	3.44
	VU108-Z7a_4						4.10 ± 0.06		2.13	34.71	6/17	9.07647	1.10 ± 0.01		4.11 ± 1.40		298.44 ± 15.51	3.24
	VU108-Z7b_1						3.41 ± 0.05		3.95	31.41	5/13	9.95489	1.00 ± 0.03		3.68 ± 0.71		295.97 ± 7.34	7.09
	Combined (Z7)						3.63 ± 0.08		14.04	31.4	18/43	9.58937	1.04 ± 0.02		2.19 ± 0.32		311.31 ± 3.60	10.19
The age in bold is the chosen eruption age for Milos volcanics
40Ar* (%) is average radiogenic 40Ar in analyses included in the weighted mean.

## Sheet: VU110-Z24
	Relative Abundances			36Ar [A]	%1s	37Ar [A]	%1s	38Ar [A]	%1s	39Ar [A]	%1s	40Ar [A]	%1s	40(r)/39(k)	± 1s	Age	± 1s	40Ar(r)	39Ar(k)	K/Ca	± 1s		Normal Isochron			39(k)/36(a)	± 1s	40(a+r)/36(a)	± 1s	r.i.		Inverse Isochron			39(k)/40(a+r)	± 1s	36(a)/40(a+r)	± 1s	r.i.		Degassing Patterns			36Ar(a) [A]	%1s	36Ar(c) [A]	%1s	36Ar(ca) [A]	%1s
																(Ma)		(%)	(%)
	286_VU110-Z24	9		0.78355	1.65579	0.164031	9.06128	0.252966	2.82197	7.91887	2.00036	207.591	1.63403	-3.32616	0.654321	-1.67969	0.33058	-12.688	4.45255	20.7587	1.9263		286_VU110-Z24	9		10.1069	0.262458	264.943	6.16365	0.453869		286_VU110-Z24	9		0.0381473	0.000985337	0.0037744	8.78079e-05	0.444366		286_VU110-Z24	9		0.783504	1.65588	0	0	4.33041e-05	9.08385
	289_VU110-Z24	9		0.759486	1.56144	0.204445	5.98045	0.25577	2.81208	7.9469	2.01309	205.28	1.66047	-2.70058	0.621552	-1.36366	0.313969	-10.4544	4.46829	16.7141	1.05469		289_VU110-Z24	9		10.4642	0.266603	270.301	6.16134	0.419886		289_VU110-Z24	9		0.038713	0.00101025	0.00369958	8.43297e-05	0.463544		289_VU110-Z24	9		0.759427	1.56156	0	0	5.39735e-05	6.0146
	278_VU110-Z24	9		0.97783	1.66662	0.176289	5.54182	0.303933	2.34284	8.52509	2.04609	273.387	1.51818	-2.17548	0.752352	-1.09843	0.379987	-6.78377	4.79341	20.7939	1.2284		278_VU110-Z24	9		8.71872	0.23009	279.593	6.30352	0.466894		278_VU110-Z24	9		0.0311837	0.000794516	0.00357663	8.06365e-05	0.401272		278_VU110-Z24	9		0.977778	1.66671	0	0	4.65403e-05	5.57866
	288_VU110-Z24	9		0.840028	0.84681	0.122515	12.001	0.276015	2.33795	8.06243	2.11227	246.469	1.59948	-0.536425	0.556467	-0.270787	0.280925	-1.75472	4.53328	28.2969	3.44812		288_VU110-Z24	9		9.59816	0.218428	293.411	5.31037	0.174118		288_VU110-Z24	9		0.0327123	0.000866738	0.00340818	6.16838e-05	0.53353		288_VU110-Z24	9		0.839989	0.846849	0	0	3.23441e-05	12.0181
	275_VU110-Z24	9		0.650388	0.640018	0.196755	4.30289	0.23185	2.78962	7.57541	2.27267	191.536	1.86006	-0.34761	0.498872	-0.175469	0.251836	-1.3748	4.25941	16.5555	0.805627		275_VU110-Z24	9		11.6483	0.275032	294.511	5.79352	0.0882067		275_VU110-Z24	9		0.0395515	0.00116158	0.00339546	6.67943e-05	0.598901		275_VU110-Z24	9		0.650331	0.640074	0	0	5.19432e-05	4.35023
	285_VU110-Z24	9		0.596769	0.583025	0.0883322	13.2016	0.204294	2.50861	6.34047	1.89462	180.808	1.53039	0.416352	0.467139	0.210147	0.235767	1.46002	3.56508	30.865	4.11643		285_VU110-Z24	9		10.6251	0.210623	302.984	4.96207	0.104712		285_VU110-Z24	9		0.0350681	0.000854101	0.00330051	5.40536e-05	0.587204		285_VU110-Z24	9		0.596741	0.583053	0	0	2.33197e-05	13.2171
	273_VU110-Z24	9	4	0.84545	1.51989	0.289538	4.67389	0.336795	2.65124	10.7407	1.60956	263.749	1.34789	1.05669	0.487888	0.5333	0.246196	4.30309	6.03913	15.951	0.7885		273_VU110-Z24	9	4	12.7052	0.28128	311.985	6.33837	0.513707		273_VU110-Z24	9	4	0.0407237	0.000854978	0.00320528	6.51192e-05	0.425983		273_VU110-Z24	9	4	0.845359	1.52005	0	0	7.64379e-05	4.7175
	274_VU110-Z24	9	4	0.716519	1.74741	0.209827	4.5003	0.278564	2.68038	8.58492	1.9732	223.652	1.60282	1.13462	0.60427	0.572624	0.304917	4.3552	4.82704	17.5929	0.864495		274_VU110-Z24	9	4	11.9824	0.315836	312.155	7.40225	0.488606		274_VU110-Z24	9	4	0.0383859	0.000975852	0.00320353	7.59665e-05	0.426182		274_VU110-Z24	9	4	0.716452	1.74757	0	0	5.53943e-05	4.54558
	281_VU110-Z24	9	4	0.619659	0.635583	0.0895089	11.2989	0.200446	2.50016	5.55824	2.21432	192.282	1.57148	1.30985	0.585103	0.661041	0.295231	3.78629	3.12524	26.7014	3.07435		281_VU110-Z24	9	4	8.97015	0.206651	310.31	5.26035	0.103449		281_VU110-Z24	9	4	0.0289071	0.000784923	0.00322259	5.46292e-05	0.536536		281_VU110-Z24	9	4	0.61963	0.635612	0	0	2.36304e-05	11.317
	282_VU110-Z24	9	4	1.12106	1.25408	0.32623	3.90654	0.431035	2.24144	12.5541	1.30006	354.214	0.997852	1.55593	0.438453	0.785205	0.221219	5.51444	7.05878	16.5471	0.681278		282_VU110-Z24	9	4	11.1993	0.20231	315.985	5.06444	0.543308		282_VU110-Z24	9	4	0.0354426	0.000580868	0.0031647	5.07222e-05	0.37909		282_VU110-Z24	9	4	1.12095	1.2542	0	0	8.61247e-05	3.95862
	258_VU110-Z24	9	4	1.11022	1.28535	0.309012	4.64858	0.391469	2.11031	9.99135	0.954365	347.109	0.655727	1.56775	0.484925	0.791168	0.244666	4.51258	5.6178	13.903	0.659773		258_VU110-Z24	9	4	9.00006	0.144093	312.67	4.512	0.715218		258_VU110-Z24	9	4	0.0287846	0.000333311	0.00319826	4.61528e-05	0.257332		258_VU110-Z24	9	4	1.11012	1.28546	0	0	8.15791e-05	4.69243
	283_VU110-Z24	9	4	0.919163	1.3776	0.316175	2.93434	0.339574	2.58072	9.01162	1.7431	293.401	1.1821	2.10821	0.571387	1.06384	0.288247	6.47509	5.06692	12.2556	0.418288		283_VU110-Z24	9	4	9.80501	0.217855	319.231	5.79529	0.470602		283_VU110-Z24	9	4	0.0307145	0.0006469	0.00313253	5.68676e-05	0.365484		283_VU110-Z24	9	4	0.919062	1.37775	0	0	8.34702e-05	3.00332
	270_VU110-Z24	9	4	0.716114	1.59568	0.201739	5.66819	0.27381	2.6973	8.25992	2.23059	233.341	1.69408	2.36699	0.634945	1.19438	0.320287	8.37864	4.6443	17.6055	1.0724		270_VU110-Z24	9	4	11.5352	0.316375	325.864	7.58412	0.398955		270_VU110-Z24	9	4	0.0353989	0.000991536	0.00306877	7.14222e-05	0.44026		270_VU110-Z24	9	4	0.716049	1.59582	0	0	5.32591e-05	5.70421
	267_VU110-Z24	9	4	0.639098	0.507212	0.183445	6.03858	0.216408	2.10081	5.90261	2.20135	206.129	1.44143	2.59743	0.533552	1.31061	0.269124	7.43772	3.31884	13.8356	0.889261		267_VU110-Z24	9	4	9.23645	0.208659	322.551	4.92895	0.0745361		267_VU110-Z24	9	4	0.0286356	0.000753503	0.00310028	4.73759e-05	0.516744		267_VU110-Z24	9	4	0.639042	0.507256	0	0	4.84294e-05	6.0724
	259_VU110-Z24	9	4	0.711702	1.60669	0.156582	8.05653	0.251194	2.87471	6.72915	2.36049	231.181	1.61109	2.77971	0.754422	1.40256	0.380512	8.09099	3.78359	18.4791	1.55136		259_VU110-Z24	9	4	9.45556	0.270004	324.844	7.39159	0.39736		259_VU110-Z24	9	4	0.029108	0.000831889	0.0030784	7.00469e-05	0.399156		259_VU110-Z24	9	4	0.711649	1.60681	0	0	4.13376e-05	8.08191
	257_VU110-Z24	9	4	0.739733	1.18276	0.157879	7.73847	0.287644	2.59472	8.90088	2.01771	247.344	1.59263	2.97701	0.53505	1.50207	0.269851	10.7129	5.00471	24.2422	1.9387		257_VU110-Z24	9	4	12.0333	0.281445	334.383	6.63376	0.301533		257_VU110-Z24	9	4	0.0359865	0.000925063	0.00299058	5.93295e-05	0.497408		257_VU110-Z24	9	4	0.739679	1.18285	0	0	4.168e-05	7.76489
	269_VU110-Z24	9	4	0.640019	0.476293	0.111216	7.76904	0.211885	1.85528	6.06241	1.67136	209.187	1.0309	2.9869	0.390697	1.50705	0.197047	8.6562	3.40872	23.4392	1.86266		269_VU110-Z24	9	4	9.47263	0.164628	326.854	3.71191	0.114953		269_VU110-Z24	9	4	0.0289812	0.000569121	0.00305947	3.47448e-05	0.47657		269_VU110-Z24	9	4	0.639984	0.47632	0	0	2.9361e-05	7.79536
	265_VU110-Z24	9	4	0.587209	1.54612	0.191457	5.08911	0.219865	2.99978	5.86984	2.6195	193.235	1.87256	3.05494	0.775015	1.54137	0.390869	9.27969	3.30041	13.183	0.754559		265_VU110-Z24	9	4	9.99701	0.304098	329.1	7.99223	0.323666		265_VU110-Z24	9	4	0.0303768	0.00097815	0.00303859	7.37924e-05	0.448424		265_VU110-Z24	9	4	0.587147	1.54629	0	0	5.05447e-05	5.12919
	255_VU110-Z24	9	4	0.322871	1.25887	0.0573519	12.2484	0.123391	2.90412	3.79119	2.14463	108.74	1.63568	3.25656	0.572834	1.64305	0.288885	11.3538	2.13168	28.4244	3.5345		255_VU110-Z24	9	4	11.7428	0.292027	336.801	6.95196	0.308767		255_VU110-Z24	9	4	0.0348656	0.000940412	0.00296911	6.12859e-05	0.480583		255_VU110-Z24	9	4	0.32285	1.25895	0	0	1.51409e-05	12.2651
	271_VU110-Z24	9	4	0.574035	1.22419	0.15098	6.07531	0.204341	2.44011	5.61663	2.23842	189.668	1.58713	3.2572	0.658123	1.64337	0.331898	9.64534	3.15805	15.9962	1.03569		271_VU110-Z24	9	4	9.78513	0.249657	330.432	6.6235	0.293082		271_VU110-Z24	9	4	0.0296131	0.000812598	0.00302634	6.06629e-05	0.457984		271_VU110-Z24	9	4	0.573986	1.22429	0	0	3.98586e-05	6.10893
	266_VU110-Z24	9		0.840127	0.540251	0.194095	5.97164	0.297729	2.02974	9.55647	1.92378	306.223	0.340154	5.79764	0.212541	2.92409	0.107111	18.0928	5.37332	21.1712	1.32825		266_VU110-Z24	9		11.3757	0.227313	364.512	2.32724	0.228811		266_VU110-Z24	9		0.0312079	0.000609693	0.00274339	1.75153e-05	0.0927682		266_VU110-Z24	9		0.840068	0.540289	0	0	5.12412e-05	6.00584
	277_VU110-Z24	9		0.992521	0.622905	0.107446	8.01106	0.307156	2.07665	8.28353	2.14419	362.878	0.517431	8.03454	0.363455	4.05105	0.183052	18.3406	4.65761	33.1506	2.7492		277_VU110-Z24	9		8.34617	0.186358	365.618	2.96079	0.214601		277_VU110-Z24	9		0.0228276	0.000503521	0.0027351	2.21489e-05	0.149894		277_VU110-Z24	9		0.992486	0.622926	0	0	2.83656e-05	8.03658
	279_VU110-Z24	9		0.821581	0.571905	0.137317	9.59911	0.245233	2.68511	6.06795	2.72241	309.074	0.820705	10.5129	0.558468	5.29881	0.281078	20.6392	3.41182	19.0011	1.89587		279_VU110-Z24	9		7.38596	0.205469	376.208	3.76337	0.117545		279_VU110-Z24	9		0.0196327	0.00055825	0.00265811	2.65902e-05	0.236805		279_VU110-Z24	9		0.821539	0.571934	0	0	3.62518e-05	9.62042
			S	17.5251	0.263996	4.14216	1.31485	6.14137	0.530737	177.851	0.415317	5576.48	0.275146																														S	17.5238	0.264016	0	0	0.00109353	1.32269
	Information on Analysis and Constants Used in Calculations									Results		40(a)/36(a)	± 1s	40(r)/39(k)	± 1s	Age	± 1s	MSWD	39Ar(k)	K/Ca	± 1s
																(Ma)			(%,n)
	Sample = 286_VU110-Z24				Age Equations = Min et al. (2000)					Age Plateau Error Mean				2.22418	0.21872	1.12234	0.110482	2.25768	60.4852	14.8589	0.784054
	Material = San				Negative Intensities = Allowed										0.0983376		0.0984395	0.00583729	14
	Location = FC				Decay Constant 40K = 5.460 ± 0.053 E-10 1/a					Full External Error							0.111149	1.39223	1σ Confidence Limit
	Analyst = Xiaolong Zhou				Decay Constant 39Ar = 2.940 ± 0.016 E-07 1/h					Analytical Error							0.110334	1.50256	Error Magnification
	Project = VU110				Decay Constant 37Ar = 8.230 ± 0.012 E-04 1/h
	Mass Discrimination Law = LIN				Decay Constant 36Cl = 2.257 ± 0.015 E-06 1/a					Total Fusion Age				1.93656	0.116546	0.977241	0.0590075		23	18.4625	0.254576
	Irradiation = VU110				Decay Activity 40K(EC,β⁺) = 3.310 ± 0.030 1/gs										0.0601821		0.0603817
	J = 0.00027560 ± 0.00000141				Decay Activity 40K(β⁻) = 27.890 ± 0.150 1/gs					Full External Error							0.0599497
	28.201 = 1.500 ± 0.005 Ma				Atmospheric Ratio 40/36(a) = 298.56 ± 0.31					Analytical Error							0.0587967
	IGSN = Undefined				Atmospheric Ratio 38/36(a) = 0.1885 ± 0.0003
	Preferred Age = Undefined				Production Ratio 39/37(ca) = 0.000673 ± 0.000004					Normal Isochron Error Chron		318.093	19.4545	0.326338	1.89478	0.164716	0.956327	2.28951	60.4852
	Classification = Undefined				Production Ratio 36/37(ca) = 0.000264 ± 0.000002								0.0611598		5.80619		5.80593	0.00659942	14
	Experiment Type = Undefined				Production Ratio 40/39(k) = 0.000860 ± 0.000070					Full External Error							0.956329	1.40825	1σ Confidence Limit
	Extraction Method = Undefined				Production Ratio 38/39(k) = 0.012110 ± 0.000030					Analytical Error							0.956327	1.51311	Error Magnification
	Heating = 90 sec				Production Ratio 36/38(cl) = 262.80 ± 1.71												5		Number of Iterations
	Isolation = 3.00 min				Scaling Ratio K/Ca = 0.430												1.40018e-07		Convergence
	Instrument = HELIX				Abundance Ratio 40K/K = 1.1700 ± 0.0100 E-04
	Lithology = Undefined				Atomic Weight K = 39.0983 ± 0.0001 g					Inverse Isochron Error Chron		316.746	19.4884	0.515847	0.147588	0.260362	0.0744982	2.29074	60.4852
	Lat-Lon = Undefined - Undefined												0.0615268		0.286108		0.286133	0.00656687	14
	Feature = Undefined									Full External Error							0.0745516	1.40825	1σ Confidence Limit
										Analytical Error							0.0744863	1.51352	Error Magnification
																	8		Number of Iterations
																	0.000358959		Convergence
																	0.00623698		Spreading Factor
[truncated: 124 more columns]

## Sheet: VU110-Z24a
	Relative Abundances			36Ar [A]	%1s	37Ar [A]	%1s	38Ar [A]	%1s	39Ar [A]	%1s	40Ar [A]	%1s	40(r)/39(k)	± 1s	Age	± 1s	40Ar(r)	39Ar(k)	K/Ca	± 1s		Normal Isochron			39(k)/36(a)	± 1s	40(a+r)/36(a)	± 1s	r.i.		Inverse Isochron			39(k)/40(a+r)	± 1s	36(a)/40(a+r)	± 1s	r.i.		Degassing Patterns			36Ar(a) [A]	%1s	36Ar(c) [A]	%1s	36Ar(ca) [A]	%1s
																(Ka)		(%)	(%)
	184_VU110-Z24A	7		6.13334	0.468201	0.17369	14.4756	1.31399	0.236932	10.7914	0.102606	1790.41	0.0167077	-3.77636	0.814334	-1839.3	396.827	-2.27611	6.95327	26.7157	3.86736		184_VU110-Z24A	7		1.75946	0.00843339	291.916	1.36763	0.976197		184_VU110-Z24A	7		0.00602729	6.26589e-06	0.00342565	1.60493e-05	0.0057315		184_VU110-Z24A	7		6.13329	0.468205	0	0	4.58542e-05	14.4898
	185_VU110-Z24A	7.8		1.01852	0.394513	0.0772011	29.8567	0.324633	0.276933	9.65361	0.10266	296.054	0.0154025	-0.832265	0.128607	-405.202	62.6216	-2.7138	6.22019	53.7691	16.0538		185_VU110-Z24A	7.8		9.4783	0.0386395	290.672	1.14764	0.967035		185_VU110-Z24A	7.8		0.0326083	3.38508e-05	0.00344031	1.35832e-05	0.00578974		185_VU110-Z24A	7.8		1.01849	0.394524	0	0	2.03811e-05	29.8636
	187_VU110-Z24A	8.3		0.847465	0.437836	0.122841	21.4901	0.330852	0.3218	12.6082	0.106181	248.39	0.0312466	-0.367044	0.0905202	-178.691	44.0707	-1.86308	8.12391	44.1339	9.48456		187_VU110-Z24A	8.3		14.8781	0.067033	293.099	1.28662	0.969367		187_VU110-Z24A	8.3		0.0507613	5.6185e-05	0.00341182	1.49769e-05	0.020099		187_VU110-Z24A	8.3		0.847425	0.437858	0	0	3.24301e-05	21.4997
	188_VU110-Z24A	8.6		0.436823	0.436997	0.103879	27.6266	0.190072	0.331153	7.81763	0.0999699	130.92	0.0302826	0.064591	0.0751106	31.4435	36.5642	0.38569	5.03718	32.3601	8.94005		188_VU110-Z24A	8.6		17.8978	0.0802395	299.716	1.313	0.972488		188_VU110-Z24A	8.6		0.0597157	6.2378e-05	0.00333649	1.46166e-05	0.0200454		188_VU110-Z24A	8.6		0.43679	0.437033	0	0	2.74242e-05	27.634
	190_VU110-Z24A	8.9		0.319542	0.505599	-0.0563055	39.5831	0.160125	0.404252	7.33775	0.10056	94.5357	0.0309223	-0.119413	0.0672307	-58.1326	32.7298	-0.926872	4.72804	-56.038	22.1816		190_VU110-Z24A	8.9		22.9627	0.11837	295.818	1.49841	0.978958		190_VU110-Z24A	8.9		0.0776244	8.16675e-05	0.00338046	1.71231e-05	0.0179506		190_VU110-Z24A	8.9		0.319552	0.505586	0	0	-1.48647e-05	39.5882
	191_VU110-Z24A	9.2		0.222103	0.586852	-0.0319345	70.2231	0.14737	0.624568	7.78902	0.110001	67.0682	0.0380595	0.0962087	0.0508457	46.8351	24.7517	1.11733	5.0188	-104.88	73.65		191_VU110-Z24A	9.2		35.0689	0.209385	301.934	1.77562	0.98082		191_VU110-Z24A	9.2		0.116148	0.000135199	0.00331198	1.94771e-05	0.0211743		191_VU110-Z24A	9.2		0.222107	0.586847	0	0	-8.43071e-06	70.226
	193_VU110-Z24A	10.3		0.538795	0.46251	0.0776055	26.6814	0.363436	0.351971	19.2239	0.0989724	161.518	0.0265128	0.0337109	0.0397312	16.4108	19.3415	0.401228	12.3867	106.516	28.4202		193_VU110-Z24A	10.3		35.6815	0.168777	299.763	1.3888	0.97626		193_VU110-Z24A	10.3		0.119032	0.000121968	0.00333597	1.54555e-05	0.0148246		193_VU110-Z24A	10.3		0.538763	0.462539	0	0	2.04878e-05	26.689
	194_VU110-Z24A	11.1		0.440337	0.439359	0.105925	19.746	0.34825	0.30132	19.627	0.0981581	131.976	0.0200837	0.0256746	0.030273	12.4987	14.7372	0.381822	12.6465	79.6753	15.7328		194_VU110-Z24A	11.1		44.5765	0.200697	299.704	1.31828	0.974924		194_VU110-Z24A	11.1		0.148735	0.000149029	0.00333662	1.46764e-05	0.00917872		194_VU110-Z24A	11.1		0.440298	0.439399	0	0	2.79641e-05	19.7563
	196_VU110-Z24A	12.9	4	0.500132	0.418048	0.192791	16.4312	0.486506	0.251714	28.903	0.0919293	151.256	0.0176079	0.0668581	0.0222749	32.5471	10.8435	1.27756	18.6233	64.4648	10.5925		196_VU110-Z24A	12.9	4	57.7984	0.247432	302.424	1.26559	0.975801		196_VU110-Z24A	12.9	4	0.191117	0.000178906	0.00330661	1.38375e-05	0.00796216		196_VU110-Z24A	12.9	4	0.500064	0.418108	0	0	5.08969e-05	16.4436
	197_VU110-Z24A	16.5	4	0.29488	0.51168	0.29317	9.62619	0.394816	0.26581	25.0033	0.0929184	91.3963	0.0176488	0.134498	0.0183972	65.4744	8.9557	3.67944	16.1105	36.6726	3.53034		197_VU110-Z24A	16.5	4	84.8171	0.441228	309.968	1.58751	0.983327		197_VU110-Z24A	16.5	4	0.273632	0.000258857	0.00322614	1.65228e-05	0.00650693		197_VU110-Z24A	16.5	4	0.294788	0.511846	0	0	7.73969e-05	9.64745
	199_VU110-Z24A	21	4	0.0785021	1.0154	0.0340084	79.5513	0.102329	0.487464	6.44307	0.108893	24.3426	0.0388219	0.140191	0.0371607	68.2453	18.0896	3.7106	4.15153	81.4654	64.8069		199_VU110-Z24A	21	4	82.0882	0.838471	310.068	3.15137	0.993573		199_VU110-Z24A	21	4	0.264743	0.000306107	0.0032251	3.27783e-05	0.0128599		199_VU110-Z24A	21	4	0.0784893	1.01561	0	0	8.97823e-06	79.5539
			S	10.8304	0.27386	1.09287	7.70012	4.16238	0.104401	155.198	0.0329629	3187.87	0.0101288																														S	10.8301	0.27387	0	0	0.000288518	7.70474
	Information on Analysis and Constants Used in Calculations									Results		40(a)/36(a)	± 1s	40(r)/39(k)	± 1s	Age	± 1s	MSWD	39Ar(k)	K/Ca	± 1s
																(Ka)			(%,n)
	Sample = 184_VU110-Z24A				Age Equations = Min et al. (2000)					Age Plateau Error Mean				0.111281	0.0232859	54.1724	11.339	3.08755	38.8854	39.563	6.08299
	Material = Biotite				Negative Intensities = Allowed										0.209252		0.209314	0.0456135	3
	Location = Milos				Decay Constant 40K = 5.460 ± 0.053 E-10 1/a					Full External Error							11.3533	2	1σ Confidence Limit
	Analyst = Xiaolong Zhou				Decay Constant 39Ar = 2.940 ± 0.016 E-07 1/h					Analytical Error							11.3355	1.75714	Error Magnification
	Project = VU110				Decay Constant 37Ar = 8.230 ± 0.012 E-04 1/h
	Mass Discrimination Law = LIN				Decay Constant 36Cl = 2.257 ± 0.015 E-06 1/a					Total Fusion Age				-0.294369	0.0585007	-143.308	28.4909		11	61.0637	4.70202
	Irradiation = VU110				Decay Activity 40K(EC,β⁺) = 3.310 ± 0.030 1/gs										0.198733		0.198809
	J = 0.00026580 ± 0.00000138				Decay Activity 40K(β⁻) = 27.890 ± 0.150 1/gs					Full External Error							28.5308
	28.201 = 1.178 ± 0.002 Ma				Atmospheric Ratio 40/36(a) = 298.56 ± 0.31					Analytical Error							28.4812
	IGSN = Undefined				Atmospheric Ratio 38/36(a) = 0.1885 ± 0.0003
	Preferred Age = Undefined				Production Ratio 39/37(ca) = 0.000673 ± 0.000004					Normal Isochron Overestimated Error		285.985	4.75553	0.284655	0.0668899	138.569	32.5684	0.0725785	38.8854
	Classification = Undefined				Production Ratio 36/37(ca) = 0.000264 ± 0.000002								0.0166286		0.234985		0.235034	0.787619	3
	Experiment Type = Undefined				Production Ratio 40/39(k) = 0.000860 ± 0.000070					Full External Error							32.601	2.41421	1σ Confidence Limit
	Extraction Method = Undefined				Production Ratio 38/39(k) = 0.012110 ± 0.000030					Analytical Error							32.5604	1	Error Magnification
	Heating = 90 sec				Production Ratio 36/38(cl) = 262.80 ± 1.71												5		Number of Iterations
	Isolation = 5.00 min				Scaling Ratio K/Ca = 0.430												2.06052e-07		Convergence
	Instrument = HELIX				Abundance Ratio 40K/K = 1.1700 ± 0.0100 E-04
	Lithology = Undefined				Atomic Weight K = 39.0983 ± 0.0001 g					Inverse Isochron Overestimated Error		285.983	4.75594	0.284697	0.0667422	138.589	32.4965	0.0728668	38.8854
	Lat-Lon = Undefined - Undefined												0.0166302		0.234432		0.234481	0.787208	3
	Feature = Undefined									Full External Error							32.5292	2.41421	1σ Confidence Limit
										Analytical Error							32.4885	1	Error Magnification
																	2		Number of Iterations
																	0.004155		Convergence
																	0.0234918		Spreading Factor
[truncated: 124 more columns]

## Sheet: VU110-Z24b
	Relative Abundances			36Ar [A]	%1s	37Ar [A]	%1s	38Ar [A]	%1s	39Ar [A]	%1s	40Ar [A]	%1s	40(r)/39(k)	± 1s	Age	± 1s	40Ar(r)	39Ar(k)	K/Ca	± 1s		Normal Isochron			39(k)/36(a)	± 1s	40(a+r)/36(a)	± 1s	r.i.		Inverse Isochron			39(k)/40(a+r)	± 1s	36(a)/40(a+r)	± 1s	r.i.		Degassing Patterns			36Ar(a) [A]	%1s	36Ar(c) [A]	%1s	36Ar(ca) [A]	%1s
																(Ka)		(%)	(%)
	205_VU110-Z24B	7		10.2542	0.295912	0.310392	8.85383	2.21629	0.185171	14.5311	0.0812708	3150.62	0.0159379	6.13613	0.661755	2984.72	321.626	2.83003	9.08558	20.1304	1.78238		205_VU110-Z24B	7		1.41709	0.00434867	307.255	0.910535	0.962897		205_VU110-Z24B	7		0.00461209	3.81974e-06	0.00325462	9.64489e-06	0.0103499		205_VU110-Z24B	7		10.254	0.295916	0	0	8.19434e-05	8.87693
	206_VU110-Z24B	7.8		1.308	0.357542	0.188156	15.1433	0.414278	0.263154	11.9699	0.0848211	387.977	0.0152236	-0.21146	0.121583	-102.944	59.1915	-0.652393	7.48423	27.355	4.14252		206_VU110-Z24B	7.8		9.15166	0.0336307	296.625	1.06157	0.972116		206_VU110-Z24B	7.8		0.0308527	2.65881e-05	0.00337126	1.20652e-05	0.00751638		206_VU110-Z24B	7.8		1.30794	0.357559	0	0	4.96733e-05	15.1569
	208_VU110-Z24B	8.3		0.822905	0.33111	-0.0283022	93.4933	0.320628	0.319205	12.2434	0.0818215	242.77	0.0250395	-0.239084	0.0698212	-116.393	33.992	-1.20575	7.6553	-186.016	173.913		208_VU110-Z24B	8.3		14.8783	0.0507454	295.003	0.979578	0.968034		208_VU110-Z24B	8.3		0.0504343	4.31557e-05	0.0033898	1.12561e-05	0.0220725		208_VU110-Z24B	8.3		0.822906	0.331111	0	0	-7.47178e-06	93.4955
	209_VU110-Z24B	8.6		0.455557	0.383611	0.00124706	1868.98	0.204375	0.310963	8.59219	0.0887791	136.515	0.0192378	0.0579793	0.0629908	28.2249	30.6643	0.364919	5.37234	2962.68	55371.9		209_VU110-Z24B	8.6		18.8611	0.0742669	299.654	1.15097	0.973027		209_VU110-Z24B	8.6		0.062943	5.7178e-05	0.00333719	1.28182e-05	0.0106135		209_VU110-Z24B	8.6		0.455551	0.383618	0	0	3.29224e-07	1868.98
	211_VU110-Z24B	8.9		0.316795	0.455357	-0.0154714	179.654	0.183183	0.413896	9.05307	0.09239	94.8469	0.0378186	0.0284139	0.0489598	13.8322	23.8341	0.271209	5.66052	-251.614	452.035		211_VU110-Z24B	8.9		28.5772	0.132782	299.372	1.36793	0.976668		211_VU110-Z24B	8.9		0.0954572	9.52989e-05	0.00334033	1.52631e-05	0.0313678		211_VU110-Z24B	8.9		0.316794	0.455365	0	0	-4.08445e-06	179.655
	212_VU110-Z24B	9.2		0.204056	0.761084	0.0150967	187.881	0.121612	0.500044	6.14561	0.0924799	62.314	0.0266568	0.22587	0.0761983	109.953	37.0921	2.2276	3.84259	175.046	328.877		212_VU110-Z24B	9.2		30.1184	0.230923	305.363	2.32561	0.99209		212_VU110-Z24B	9.2		0.0986315	9.49317e-05	0.00327479	2.49404e-05	0.00970203		212_VU110-Z24B	9.2		0.204048	0.761121	0	0	3.98552e-06	187.882
	214_VU110-Z24B	10.3		0.484104	0.467297	0.190643	12.5754	0.370364	0.266658	20.5663	0.0816699	144.997	0.0378582	0.0225429	0.0337497	10.9742	16.4297	0.319747	12.8592	46.3875	5.83354		214_VU110-Z24B	10.3		42.4885	0.201583	299.518	1.40441	0.981853		214_VU110-Z24B	10.3		0.141856	0.000127707	0.0033387	1.56549e-05	0.0339847		214_VU110-Z24B	10.3		0.484042	0.467359	0	0	5.03298e-05	12.5917
	215_VU110-Z24B	11.1	4	0.388829	0.45958	0.222705	9.6549	0.320026	0.329516	18.0653	0.0924797	119.808	0.0414346	0.206171	0.030405	100.364	14.8007	3.10873	11.2954	34.8803	3.36781		215_VU110-Z24B	11.1	4	46.4686	0.21788	308.14	1.42216	0.976393		215_VU110-Z24B	11.1	4	0.150803	0.000152833	0.00324527	1.49779e-05	0.0367376		215_VU110-Z24B	11.1	4	0.388759	0.459665	0	0	5.8794e-05	9.67609
	217_VU110-Z24B	12.9	4	0.448436	0.488905	0.201271	11.0121	0.482244	0.289084	29.2295	0.0768586	136.56	0.0171018	0.0913593	0.0229095	44.4744	11.1524	1.95546	18.2759	62.4462	6.87678		217_VU110-Z24B	12.9	4	65.1908	0.322686	304.516	1.48995	0.987263		217_VU110-Z24B	12.9	4	0.21408	0.000168595	0.0032839	1.60676e-05	0.00765068		217_VU110-Z24B	12.9	4	0.448366	0.488984	0	0	5.31356e-05	11.0306
	218_VU110-Z24B	16.5	4	0.252189	0.613843	0.138395	16.3481	0.290101	0.289453	17.992	0.0845508	79.8662	0.0320458	0.254061	0.0260944	123.676	12.7023	5.72336	11.2496	55.9017	9.13898		218_VU110-Z24B	16.5	4	71.3558	0.442231	316.689	1.947	0.9893		218_VU110-Z24B	16.5	4	0.225319	0.00020377	0.00315767	1.94133e-05	0.0185215		218_VU110-Z24B	16.5	4	0.252143	0.61396	0	0	3.65362e-05	16.3606
	220_VU110-Z24B	21	4	0.0951701	1.0067	0.227188	11.085	0.174941	0.486522	11.5464	0.0889683	30.7259	0.0579165	0.201101	0.0249542	97.8958	12.1474	7.55701	7.21941	21.8537	2.42256		220_VU110-Z24B	21	4	121.408	1.22786	322.975	3.25913	0.994477		220_VU110-Z24B	21	4	0.375904	0.000399219	0.00309621	3.12438e-05	0.0313838		220_VU110-Z24B	21	4	0.0951033	1.00743	0	0	5.99777e-05	11.1035
			S	15.0302	0.207641	1.45132	5.7903	5.09804	0.0998019	159.935	0.0272988	4587	0.0112981																														S	15.0297	0.207648	0	0	0.000383148	5.79584
	Information on Analysis and Constants Used in Calculations									Results		40(a)/36(a)	± 1s	40(r)/39(k)	± 1s	Age	± 1s	MSWD	39Ar(k)	K/Ca	± 1s
																(Ka)			(%,n)
	Sample = 205_VU110-Z24B				Age Equations = Min et al. (2000)					Age Plateau Error Mean				0.180342	0.0366913	87.7906	17.8668	8.16033	48.0402	30.1318	7.06663
	Material = Biotite				Negative Intensities = Allowed										0.203454		0.203516	1.98216e-05	4
	Location = Milos				Decay Constant 40K = 5.460 ± 0.053 E-10 1/a					Full External Error							17.8921	1.8165	1σ Confidence Limit
	Analyst = Xiaolong Zhou				Decay Constant 39Ar = 2.940 ± 0.016 E-07 1/h					Analytical Error							17.861	2.85663	Error Magnification
	Project = VU110				Decay Constant 37Ar = 8.230 ± 0.012 E-04 1/h
	Mass Discrimination Law = LIN				Decay Constant 36Cl = 2.257 ± 0.015 E-06 1/a					Total Fusion Age				0.622759	0.0617564	303.142	30.1002		11	47.3855	2.74379
	Irradiation = VU110				Decay Activity 40K(EC,β⁺) = 3.310 ± 0.030 1/gs										0.0991658		0.0992938
	J = 0.00026580 ± 0.00000138				Decay Activity 40K(β⁻) = 27.890 ± 0.150 1/gs					Full External Error							30.2788
	28.201 = 1.500 ± 0.005 Ma				Atmospheric Ratio 40/36(a) = 298.56 ± 0.31					Analytical Error							30.0589
	IGSN = Undefined				Atmospheric Ratio 38/36(a) = 0.1885 ± 0.0003
	Preferred Age = Undefined				Production Ratio 39/37(ca) = 0.000673 ± 0.000004					Normal Isochron Error Chron		297.463	10.2924	0.192842	0.154149	93.8757	75.0397	12.7799	48.0402
	Classification = Undefined				Production Ratio 36/37(ca) = 0.000264 ± 0.000002								0.0346007		0.799355		0.799351	2.81687e-06	4
	Experiment Type = Undefined				Production Ratio 40/39(k) = 0.000860 ± 0.000070					Full External Error							75.0466	2	1σ Confidence Limit
	Extraction Method = Undefined				Production Ratio 38/39(k) = 0.012110 ± 0.000030					Analytical Error							75.0381	3.5749	Error Magnification
	Heating = 90 sec				Production Ratio 36/38(cl) = 262.80 ± 1.71												5		Number of Iterations
	Isolation = 5.00 min				Scaling Ratio K/Ca = 0.430												1.5936e-06		Convergence
	Instrument = HELIX				Abundance Ratio 40K/K = 1.1700 ± 0.0100 E-04
	Lithology = Undefined				Atomic Weight K = 39.0983 ± 0.0001 g					Inverse Isochron Error Chron		297.536	10.1949	0.19455	0.0998466	94.7072	48.6066	12.6534	48.0402
	Lat-Lon = Undefined - Undefined												0.0342644		0.513217		0.513231	3.19673e-06	4
	Feature = Undefined									Full External Error							48.6175	2	1σ Confidence Limit
										Analytical Error							48.6041	3.55716	Error Magnification
																	3		Number of Iterations
																	4.59186e-05		Convergence
																	0.0437934		Spreading Factor
[truncated: 124 more columns]

## Sheet: Combined (Z24a&b)
	Relative Abundances			36Ar [A]	%1s	37Ar [A]	%1s	38Ar [A]	%1s	39Ar [A]	%1s	40Ar [A]	%1s	40(r)/39(k)	± 1s	Age	± 1s	40Ar(r)	39Ar(k)	K/Ca	± 1s		Normal Isochron			39(k)/36(a)	± 1s	40(a+r)/36(a)	± 1s	r.i.		Inverse Isochron			39(k)/40(a+r)	± 1s	36(a)/40(a+r)	± 1s	r.i.		Degassing Patterns			36Ar(a) [A]	%1s	36Ar(c) [A]	%1s	36Ar(ca) [A]	%1s
																(Ka)		(%)	(%)
	205_VU110-Z24B	7		10.2542	0.295912	0.310392	8.85383	2.21629	0.185171	14.5311	0.0812708	3150.62	0.0159379	6.13613	0.661755	2984.72	321.626	2.83003	4.61107	20.1304	1.78238		205_VU110-Z24B	7		1.41709	0.00434867	307.255	0.910535	0.962897		205_VU110-Z24B	7		0.00461209	3.81974e-06	0.00325462	9.64489e-06	0.0103499		205_VU110-Z24B	7		10.254	0.295916	0	0	8.19434e-05	8.87693
	206_VU110-Z24B	7.8		1.308	0.357542	0.188156	15.1433	0.414278	0.263154	11.9699	0.0848211	387.977	0.0152236	-0.21146	0.121583	-102.944	59.1915	-0.652393	3.79836	27.355	4.14252		206_VU110-Z24B	7.8		9.15166	0.0336307	296.625	1.06157	0.972116		206_VU110-Z24B	7.8		0.0308527	2.65881e-05	0.00337126	1.20652e-05	0.00751638		206_VU110-Z24B	7.8		1.30794	0.357559	0	0	4.96733e-05	15.1569
	208_VU110-Z24B	8.3		0.822905	0.33111	-0.0283022	93.4933	0.320628	0.319205	12.2434	0.0818215	242.77	0.0250395	-0.239084	0.0698212	-116.393	33.992	-1.20575	3.88518	-186.016	173.913		208_VU110-Z24B	8.3		14.8783	0.0507454	295.003	0.979578	0.968034		208_VU110-Z24B	8.3		0.0504343	4.31557e-05	0.0033898	1.12561e-05	0.0220725		208_VU110-Z24B	8.3		0.822906	0.331111	0	0	-7.47178e-06	93.4955
	209_VU110-Z24B	8.6		0.455557	0.383611	0.00124706	1868.98	0.204375	0.310963	8.59219	0.0887791	136.515	0.0192378	0.0579793	0.0629908	28.2249	30.6643	0.364919	2.72655	2962.68	55371.9		209_VU110-Z24B	8.6		18.8611	0.0742669	299.654	1.15097	0.973027		209_VU110-Z24B	8.6		0.062943	5.7178e-05	0.00333719	1.28182e-05	0.0106135		209_VU110-Z24B	8.6		0.455551	0.383618	0	0	3.29224e-07	1868.98
	211_VU110-Z24B	8.9		0.316795	0.455357	-0.0154714	179.654	0.183183	0.413896	9.05307	0.09239	94.8469	0.0378186	0.0284139	0.0489598	13.8322	23.8341	0.271209	2.8728	-251.614	452.035		211_VU110-Z24B	8.9		28.5772	0.132782	299.372	1.36793	0.976668		211_VU110-Z24B	8.9		0.0954572	9.52989e-05	0.00334033	1.52631e-05	0.0313678		211_VU110-Z24B	8.9		0.316794	0.455365	0	0	-4.08445e-06	179.655
	212_VU110-Z24B	9.2		0.204056	0.761084	0.0150967	187.881	0.121612	0.500044	6.14561	0.0924799	62.314	0.0266568	0.22587	0.0761983	109.953	37.0921	2.2276	1.95017	175.046	328.877		212_VU110-Z24B	9.2		30.1184	0.230923	305.363	2.32561	0.99209		212_VU110-Z24B	9.2		0.0986315	9.49317e-05	0.00327479	2.49404e-05	0.00970203		212_VU110-Z24B	9.2		0.204048	0.761121	0	0	3.98552e-06	187.882
	214_VU110-Z24B	10.3		0.484104	0.467297	0.190643	12.5754	0.370364	0.266658	20.5663	0.0816699	144.997	0.0378582	0.0225429	0.0337497	10.9742	16.4297	0.319747	6.52624	46.3875	5.83354		214_VU110-Z24B	10.3		42.4885	0.201583	299.518	1.40441	0.981853		214_VU110-Z24B	10.3		0.141856	0.000127707	0.0033387	1.56549e-05	0.0339847		214_VU110-Z24B	10.3		0.484042	0.467359	0	0	5.03298e-05	12.5917
	215_VU110-Z24B	11.1	4	0.388829	0.45958	0.222705	9.6549	0.320026	0.329516	18.0653	0.0924797	119.808	0.0414346	0.206171	0.030405	100.364	14.8007	3.10873	5.73257	34.8803	3.36781		215_VU110-Z24B	11.1	4	46.4686	0.21788	308.14	1.42216	0.976393		215_VU110-Z24B	11.1	4	0.150803	0.000152833	0.00324527	1.49779e-05	0.0367376		215_VU110-Z24B	11.1	4	0.388759	0.459665	0	0	5.8794e-05	9.67609
	217_VU110-Z24B	12.9	4	0.448436	0.488905	0.201271	11.0121	0.482244	0.289084	29.2295	0.0768586	136.56	0.0171018	0.0913593	0.0229095	44.4744	11.1524	1.95546	9.2753	62.4462	6.87678		217_VU110-Z24B	12.9	4	65.1908	0.322686	304.516	1.48995	0.987263		217_VU110-Z24B	12.9	4	0.21408	0.000168595	0.0032839	1.60676e-05	0.00765068		217_VU110-Z24B	12.9	4	0.448366	0.488984	0	0	5.31356e-05	11.0306
	218_VU110-Z24B	16.5	4	0.252189	0.613843	0.138395	16.3481	0.290101	0.289453	17.992	0.0845508	79.8662	0.0320458	0.254061	0.0260944	123.676	12.7023	5.72336	5.70933	55.9017	9.13898		218_VU110-Z24B	16.5	4	71.3558	0.442231	316.689	1.947	0.9893		218_VU110-Z24B	16.5	4	0.225319	0.00020377	0.00315767	1.94133e-05	0.0185215		218_VU110-Z24B	16.5	4	0.252143	0.61396	0	0	3.65362e-05	16.3606
	220_VU110-Z24B	21	4	0.0951701	1.0067	0.227188	11.085	0.174941	0.486522	11.5464	0.0889683	30.7259	0.0579165	0.201101	0.0249542	97.8958	12.1474	7.55701	3.66396	21.8537	2.42256		220_VU110-Z24B	21	4	121.408	1.22786	322.975	3.25913	0.994477		220_VU110-Z24B	21	4	0.375904	0.000399219	0.00309621	3.12438e-05	0.0313838		220_VU110-Z24B	21	4	0.0951033	1.00743	0	0	5.99777e-05	11.1035
	184_VU110-Z24A	7		6.13334	0.468201	0.17369	14.4756	1.31399	0.236932	10.7914	0.102606	1790.41	0.0167077	-3.77636	0.814334	-1839.3	396.827	-2.27611	3.42438	26.7157	3.86736		184_VU110-Z24A	7		1.75946	0.00843339	291.916	1.36763	0.976197		184_VU110-Z24A	7		0.00602729	6.26589e-06	0.00342565	1.60493e-05	0.0057315		184_VU110-Z24A	7		6.13329	0.468205	0	0	4.58542e-05	14.4898
	185_VU110-Z24A	7.8		1.01852	0.394513	0.0772011	29.8567	0.324633	0.276933	9.65361	0.10266	296.054	0.0154025	-0.832265	0.128607	-405.202	62.6216	-2.7138	3.06335	53.7691	16.0538		185_VU110-Z24A	7.8		9.4783	0.0386395	290.672	1.14764	0.967035		185_VU110-Z24A	7.8		0.0326083	3.38508e-05	0.00344031	1.35832e-05	0.00578974		185_VU110-Z24A	7.8		1.01849	0.394524	0	0	2.03811e-05	29.8636
	187_VU110-Z24A	8.3		0.847465	0.437836	0.122841	21.4901	0.330852	0.3218	12.6082	0.106181	248.39	0.0312466	-0.367044	0.0905202	-178.691	44.0707	-1.86308	4.0009	44.1339	9.48456		187_VU110-Z24A	8.3		14.8781	0.067033	293.099	1.28662	0.969367		187_VU110-Z24A	8.3		0.0507613	5.6185e-05	0.00341182	1.49769e-05	0.020099		187_VU110-Z24A	8.3		0.847425	0.437858	0	0	3.24301e-05	21.4997
	188_VU110-Z24A	8.6		0.436823	0.436997	0.103879	27.6266	0.190072	0.331153	7.81763	0.0999699	130.92	0.0302826	0.064591	0.0751106	31.4435	36.5642	0.38569	2.48074	32.3601	8.94005		188_VU110-Z24A	8.6		17.8978	0.0802395	299.716	1.313	0.972488		188_VU110-Z24A	8.6		0.0597157	6.2378e-05	0.00333649	1.46166e-05	0.0200454		188_VU110-Z24A	8.6		0.43679	0.437033	0	0	2.74242e-05	27.634
	190_VU110-Z24A	8.9		0.319542	0.505599	-0.0563055	39.5831	0.160125	0.404252	7.33775	0.10056	94.5357	0.0309223	-0.119413	0.0672307	-58.1326	32.7299	-0.926872	2.32849	-56.038	22.1816		190_VU110-Z24A	8.9		22.9627	0.11837	295.818	1.49841	0.978958		190_VU110-Z24A	8.9		0.0776244	8.16675e-05	0.00338046	1.71231e-05	0.0179506		190_VU110-Z24A	8.9		0.319552	0.505586	0	0	-1.48647e-05	39.5882
	191_VU110-Z24A	9.2		0.222103	0.586852	-0.0319345	70.2231	0.14737	0.624568	7.78902	0.110001	67.0682	0.0380595	0.0962087	0.0508457	46.8351	24.7517	1.11733	2.47168	-104.88	73.65		191_VU110-Z24A	9.2		35.0689	0.209385	301.934	1.77562	0.98082		191_VU110-Z24A	9.2		0.116148	0.000135199	0.00331198	1.94771e-05	0.0211743		191_VU110-Z24A	9.2		0.222107	0.586847	0	0	-8.43071e-06	70.226
	193_VU110-Z24A	10.3		0.538795	0.46251	0.0776055	26.6814	0.363436	0.351971	19.2239	0.0989724	161.518	0.0265128	0.0337109	0.0397312	16.4108	19.3415	0.401228	6.10028	106.516	28.4202		193_VU110-Z24A	10.3		35.6815	0.168777	299.763	1.3888	0.97626		193_VU110-Z24A	10.3		0.119032	0.000121968	0.00333597	1.54555e-05	0.0148246		193_VU110-Z24A	10.3		0.538763	0.462539	0	0	2.04878e-05	26.689
	194_VU110-Z24A	11.1		0.440337	0.439359	0.105925	19.746	0.34825	0.30132	19.627	0.0981581	131.976	0.0200837	0.0256746	0.030273	12.4987	14.7372	0.381822	6.22819	79.6753	15.7328		194_VU110-Z24A	11.1		44.5765	0.200697	299.704	1.31828	0.974924		194_VU110-Z24A	11.1		0.148735	0.000149029	0.00333662	1.46764e-05	0.00917872		194_VU110-Z24A	11.1		0.440298	0.439399	0	0	2.79641e-05	19.7563
	196_VU110-Z24A	12.9	4	0.500132	0.418048	0.192791	16.4312	0.486506	0.251714	28.903	0.0919293	151.256	0.0176079	0.0668581	0.0222749	32.5471	10.8435	1.27756	9.17171	64.4648	10.5925		196_VU110-Z24A	12.9	4	57.7984	0.247432	302.424	1.26559	0.975801		196_VU110-Z24A	12.9	4	0.191117	0.000178906	0.00330661	1.38375e-05	0.00796216		196_VU110-Z24A	12.9	4	0.500064	0.418108	0	0	5.08969e-05	16.4436
	197_VU110-Z24A	16.5	4	0.29488	0.51168	0.29317	9.62619	0.394816	0.26581	25.0033	0.0929184	91.3963	0.0176488	0.134498	0.0183972	65.4744	8.9557	3.67944	7.93418	36.6726	3.53034		197_VU110-Z24A	16.5	4	84.8171	0.441228	309.968	1.58751	0.983327		197_VU110-Z24A	16.5	4	0.273632	0.000258857	0.00322614	1.65228e-05	0.00650693		197_VU110-Z24A	16.5	4	0.294788	0.511846	0	0	7.73969e-05	9.64745
	199_VU110-Z24A	21	4	0.0785021	1.0154	0.0340084	79.5513	0.102329	0.487464	6.44307	0.108893	24.3426	0.0388219	0.140191	0.0371607	68.2453	18.0896	3.7106	2.04456	81.4654	64.8069		199_VU110-Z24A	21	4	82.0882	0.838471	310.068	3.15137	0.993573		199_VU110-Z24A	21	4	0.264743	0.000306107	0.0032251	3.27783e-05	0.0128599		199_VU110-Z24A	21	4	0.0784893	1.01561	0	0	8.97823e-06	79.5539
			S	25.8606	0.166488	2.54419	4.67445	9.26042	0.072255	315.133	0.021342	7774.87	0.00785356																														S	25.8598	0.166494	0	0	0.000671667	4.67809
	Information on Analysis and Constants Used in Calculations									Results		40(a)/36(a)	± 1s	40(r)/39(k)	± 1s	Age	± 1s	MSWD	39Ar(k)	K/Ca	± 1s
																(Ka)			(%,n)
	Sample = 205_VU110-Z24B				Age Equations = Min et al. (2000)					Age Plateau Error Mean				0.14689	0.0251626	71.5068	12.2547	7.44319	43.5316	32.3441	4.96656
	Material = Biotite				Negative Intensities = Allowed										0.171302		0.171377	5.46979e-08	7
	Location = Milos				Decay Constant 40K = 5.460 ± 0.053 E-10 1/a					Full External Error							12.2791	1.57735	1σ Confidence Limit
	Analyst = Xiaolong Zhou				Decay Constant 39Ar = 2.940 ± 0.016 E-07 1/h					Analytical Error							12.249	2.72822	Error Magnification
	Project = VU110				Decay Constant 37Ar = 8.230 ± 0.012 E-04 1/h
	Mass Discrimination Law = LIN				Decay Constant 36Cl = 2.257 ± 0.015 E-06 1/a					Total Fusion Age				0.171088	0.0425722	83.286	20.7283		22	53.261	2.48969
	Irradiation = VU110				Decay Activity 40K(EC,β⁺) = 3.310 ± 0.030 1/gs										0.248832		0.248881
	J = 0.00026580 ± 0.00000138				Decay Activity 40K(β⁻) = 27.890 ± 0.150 1/gs					Full External Error							20.7479
	28.201 = 1.500 ± 0.005 Ma				Atmospheric Ratio 40/36(a) = 298.56 ± 0.31					Analytical Error							20.7238
	IGSN = Undefined				Atmospheric Ratio 38/36(a) = 0.1885 ± 0.0003
	Preferred Age = Undefined				Production Ratio 39/37(ca) = 0.000673 ± 0.000004					Normal Isochron Error Chron		295.455	7.36748	0.187566	0.107163	91.3076	52.1679	8.86286	43.5316
	Classification = Undefined				Production Ratio 36/37(ca) = 0.000264 ± 0.000002								0.024936		0.571333		0.571343	1.99968e-08	7
	Experiment Type = Undefined				Production Ratio 40/39(k) = 0.000860 ± 0.000070					Full External Error							52.1773	1.63246	1σ Confidence Limit
	Extraction Method = Undefined				Production Ratio 38/39(k) = 0.012110 ± 0.000030					Analytical Error							52.1657	2.97706	Error Magnification
	Heating = 90 sec				Production Ratio 36/38(cl) = 262.80 ± 1.71												6		Number of Iterations
	Isolation = 5.00 min				Scaling Ratio K/Ca = 0.430												2.55573e-07		Convergence
	Instrument = HELIX				Abundance Ratio 40K/K = 1.1700 ± 0.0100 E-04
	Lithology = Undefined				Atomic Weight K = 39.0983 ± 0.0001 g					Inverse Isochron Error Chron		295.674	7.39187	0.186867	0.0642704	90.9672	31.2897	9.02332	43.5316
	Lat-Lon = Undefined - Undefined												0.025		0.343936		0.343967	1.37382e-08	7
	Feature = Undefined									Full External Error							31.3052	1.63246	1σ Confidence Limit
										Analytical Error							31.2861	3.00388	Error Magnification
																	3		Number of Iterations
																	7.85297e-06		Convergence
																	0.042064		Spreading Factor
[truncated: 124 more columns]

## Sheet: VU110-Z22
	Relative Abundances			36Ar [A]	%1s	37Ar [A]	%1s	38Ar [A]	%1s	39Ar [A]	%1s	40Ar [A]	%1s	40(r)/39(k)	± 1s	Age	± 1s	40Ar(r)	39Ar(k)	K/Ca	± 1s		Normal Isochron			39(k)/36(a)	± 1s	40(a+r)/36(a)	± 1s	r.i.		Inverse Isochron			39(k)/40(a+r)	± 1s	36(a)/40(a+r)	± 1s	r.i.		Degassing Patterns			36Ar(a) [A]	%1s	36Ar(c) [A]	%1s	36Ar(ca) [A]	%1s
																(Ma)		(%)	(%)
	205_VU110-Z22	9		0.0866156	2.67022	-0.00714538	64.4469	0.0510729	3.70436	2.14733	1.32252	26.5321	1.38398	0.312284	0.36445	0.157622	0.183944	2.52741	1.23418	-129.224	83.2982		205_VU110-Z22	9		24.7917	0.738748	306.302	9.21246	0.795589		205_VU110-Z22	9		0.0809389	0.00154945	0.00326475	9.8192e-05	0.332716		205_VU110-Z22	9		0.0866148	2.67025	0	0	-1.88638e-06	64.45
	211_VU110-Z22	9		0.631309	2.99275	0.513959	2.71613	0.400828	3.8465	14.688	1.2082	193.273	1.46688	0.328662	0.430057	0.165889	0.217057	2.49765	8.44174	12.2883	0.3653		211_VU110-Z22	9		23.2716	0.751251	306.209	10.208	0.832708		211_VU110-Z22	9		0.0759993	0.00144435	0.00326575	0.000108869	0.33967		211_VU110-Z22	9		0.63114	2.99355	0	0	0.000135685	2.79052
	187_VU110-Z22	9		0.31523	3.97785	0.220787	6.2019	0.2178	4.56431	8.71266	1.89363	97.4824	2.5157	0.388209	0.513858	0.195943	0.259348	3.46963	5.00752	16.9683	1.10032		187_VU110-Z22	9		27.6452	1.21817	309.292	14.5599	0.763175		187_VU110-Z22	9		0.0893821	0.00281457	0.00323319	0.000152202	0.427006		187_VU110-Z22	9		0.315155	3.9788	0	0	5.82877e-05	6.23483
	189_VU110-Z22	9		0.503009	2.7203	0.292452	5.45793	0.289533	3.7471	10.6287	1.42168	155.103	1.56253	0.465224	0.447208	0.234813	0.225705	3.18798	6.10875	15.6274	0.881396		189_VU110-Z22	9		21.134	0.648789	308.392	9.6762	0.768565		189_VU110-Z22	9		0.0685297	0.00144775	0.00324263	0.000101742	0.368375		189_VU110-Z22	9		0.502911	2.72083	0	0	7.72073e-05	5.49533
	191_VU110-Z22	9		0.344783	3.87593	0.296081	5.94493	0.247295	4.19911	9.71821	1.57342	108.015	2.09233	0.524581	0.472052	0.264769	0.23824	4.7196	5.58543	14.1135	0.867929		191_VU110-Z22	9		28.1939	1.17968	313.35	13.8052	0.815417		191_VU110-Z22	9		0.0899759	0.00235563	0.00319132	0.000140599	0.379608		191_VU110-Z22	9		0.344684	3.87704	0	0	7.81654e-05	5.97928
	213_VU110-Z22	9		0.428559	3.11122	0.291155	4.8506	0.278375	3.77449	10.9667	1.48998	134.067	1.83402	0.55956	0.426914	0.282423	0.215457	4.57712	6.30302	16.1962	0.821843		213_VU110-Z22	9		25.5951	0.883096	312.882	11.302	0.777021		213_VU110-Z22	9		0.0818044	0.00193312	0.00319609	0.00011545	0.394106		213_VU110-Z22	9		0.428462	3.11193	0	0	7.6865e-05	4.89264
	219_VU110-Z22	9		0.267291	4.03385	0.1733	5.63985	0.181282	4.61373	7.32711	2.48405	85.0976	3.22282	0.724238	0.577567	0.365531	0.291476	6.23577	4.21119	18.18	1.12038		219_VU110-Z22	9		27.4181	1.2991	318.417	16.4432	0.665328		219_VU110-Z22	9		0.0861075	0.00350393	0.00314053	0.000162178	0.494348		219_VU110-Z22	9		0.267232	4.03474	0	0	4.57513e-05	5.67605
	190_VU110-Z22	9		0.401846	3.21044	0.261155	5.64843	0.238959	3.98426	8.81463	1.94783	127.22	2.13155	0.82401	0.534843	0.415882	0.269907	5.70916	5.06611	14.5133	0.867148		190_VU110-Z22	9		21.9396	0.823996	316.638	12.2041	0.712326		190_VU110-Z22	9		0.0692892	0.0020008	0.00315818	0.000121725	0.408285		190_VU110-Z22	9		0.401759	3.21114	0	0	6.89449e-05	5.68457
	207_VU110-Z22	9		0.565356	2.46163	0.29738	4.66453	0.321354	3.46452	11.8508	1.39895	179.523	1.48822	0.907161	0.417301	0.457843	0.210585	5.98832	6.81116	17.1355	0.834467		207_VU110-Z22	9		20.9651	0.593683	317.579	9.13657	0.744064		207_VU110-Z22	9		0.0660155	0.00134843	0.00314883	9.05901e-05	0.376938		207_VU110-Z22	9		0.565255	2.46207	0	0	7.85084e-05	4.70823
	214_VU110-Z22	9		0.256959	4.36199	0.213675	7.58792	0.175726	5.25251	6.90584	3.03678	83.1082	3.72652	0.92756	0.660972	0.468137	0.333548	7.70736	3.96905	13.897	1.13581		214_VU110-Z22	9		26.882	1.42904	323.495	18.5626	0.624095		214_VU110-Z22	9		0.0830988	0.00399491	0.00309124	0.00017738	0.503484		214_VU110-Z22	9		0.256889	4.36318	0	0	5.64103e-05	7.61487
	217_VU110-Z22	9		0.298189	3.59127	0.125987	10.3587	0.195269	4.17659	8.06989	2.4221	96.8406	3.01453	0.969072	0.53714	0.489086	0.271055	8.07535	4.63812	27.5426	2.93		217_VU110-Z22	9		27.0669	1.17259	324.79	15.2305	0.635054		217_VU110-Z22	9		0.0833367	0.00322282	0.00307891	0.000144381	0.501177		217_VU110-Z22	9		0.298143	3.59182	0	0	3.32607e-05	10.3784
	215_VU110-Z22	9		0.253891	3.88863	0.158822	6.78864	0.165263	4.63077	6.86482	2.82399	83.3045	3.47535	1.09439	0.602768	0.552321	0.304162	9.0183	3.9455	18.5857	1.36654		215_VU110-Z22	9		27.0437	1.29987	328.156	17.1169	0.603387		215_VU110-Z22	9		0.0824109	0.00369059	0.00304733	0.000158951	0.517136		215_VU110-Z22	9		0.253838	3.88944	0	0	4.19291e-05	6.81875
	210_VU110-Z22	9		0.427633	3.00761	0.240805	5.66437	0.252885	3.95336	9.63763	2.08027	138.612	2.21618	1.13658	0.510979	0.573612	0.257842	7.90245	5.53914	17.2094	1.03846		210_VU110-Z22	9		22.541	0.824422	324.18	12.1129	0.662171		210_VU110-Z22	9		0.0695325	0.00211357	0.00308471	0.000115259	0.432485		210_VU110-Z22	9		0.427552	3.00818	0	0	6.35726e-05	5.70041
	186_VU110-Z22	9		0.222837	4.23957	0.118212	9.31337	0.145507	5.21276	5.85306	2.83934	73.2604	3.56263	1.15113	0.657489	0.580953	0.33177	9.19668	3.36401	21.2904	2.07295		186_VU110-Z22	9		26.2706	1.34064	328.801	18.2105	0.636168		186_VU110-Z22	9		0.0798983	0.00364008	0.00304135	0.000168445	0.503081		186_VU110-Z22	9		0.222796	4.24036	0	0	3.12081e-05	9.33533
	193_VU110-Z22	9		0.334233	2.85747	0.120735	10.3307	0.178561	3.80291	6.95129	2.46924	107.89	2.61206	1.16644	0.577656	0.588681	0.291485	7.51522	3.99521	24.7568	2.6296		193_VU110-Z22	9		20.8001	0.785586	322.822	12.499	0.558512		193_VU110-Z22	9		0.0644321	0.00231605	0.00309768	0.000119936	0.490293		193_VU110-Z22	9		0.334191	2.85783	0	0	3.18741e-05	10.3505
	206_VU110-Z22	9	4	0.143918	2.23322	0.0208896	33.5602	0.0943465	2.49172	4.38619	0.661995	48.1985	0.855774	1.19229	0.238475	0.601724	0.120334	10.8501	2.52096	90.2867	30.3063		206_VU110-Z22	9	4	30.4791	0.709985	334.9	8.00993	0.895284		206_VU110-Z22	9	4	0.0910095	0.000984715	0.00298597	7.14165e-05	0.283041		206_VU110-Z22	9	4	0.143908	2.23337	0	0	5.51487e-06	33.5663
	218_VU110-Z22	9	4	0.646124	2.03774	0.251464	4.5218	0.28091	3.44055	8.52427	1.70683	203.321	1.37739	1.22382	0.567094	0.617634	0.286151	5.13079	4.89923	14.5761	0.704496		218_VU110-Z22	9	4	13.1944	0.350753	314.708	7.74131	0.635172		218_VU110-Z22	9	4	0.0419259	0.000919575	0.00317755	7.81628e-05	0.351669		218_VU110-Z22	9	4	0.64604	2.03801	0	0	6.63864e-05	4.56687
	201_VU110-Z22	9	4	0.292193	1.82232	0.117469	7.7311	0.191461	2.22506	8.89454	1.43893	98.7866	1.96365	1.29899	0.282779	0.655565	0.142685	11.6958	5.1121	32.5587	2.56037		201_VU110-Z22	9	4	30.4446	0.706963	338.107	9.05868	0.533913		201_VU110-Z22	9	4	0.0900441	0.00219218	0.00295764	7.9242e-05	0.591243		201_VU110-Z22	9	4	0.292153	1.82257	0	0	3.10117e-05	7.75755
	202_VU110-Z22	9	4	0.179237	2.45455	0.125804	6.41854	0.126782	2.58579	5.75106	1.07379	61.9926	1.65768	1.47572	0.290585	0.744738	0.146617	13.6901	3.30537	19.6569	1.27922		202_VU110-Z22	9	4	32.0932	0.859991	345.921	10.2476	0.759302		202_VU110-Z22	9	4	0.0927761	0.00183251	0.00289084	8.56386e-05	0.469693		202_VU110-Z22	9	4	0.179196	2.45511	0	0	3.32123e-05	6.45037
	209_VU110-Z22	9	4	0.128363	3.28636	0.0486402	17.1316	0.0727238	3.57431	2.77734	1.16611	42.4804	1.32631	1.49757	0.497306	0.755761	0.250918	9.79089	1.59626	24.5526	4.21597		209_VU110-Z22	9	4	21.6393	0.754679	330.966	11.7306	0.873962		209_VU110-Z22	9	4	0.0653822	0.00115472	0.00302145	0.000107091	0.281051		209_VU110-Z22	9	4	0.128345	3.28681	0	0	1.2841e-05	17.1435
	194_VU110-Z22	9	4	0.331438	3.32979	0.131558	9.79785	0.181828	4.7816	6.60907	3.15173	109.754	3.03765	1.63534	0.711291	0.825271	0.358871	9.84744	3.79852	21.6016	2.22331		194_VU110-Z22	9	4	19.9432	0.914439	331.174	14.9282	0.536593		194_VU110-Z22	9	4	0.0602196	0.00263608	0.00301956	0.000136111	0.467683		194_VU110-Z22	9	4	0.331391	3.33026	0	0	3.47312e-05	9.81873
	203_VU110-Z22	9	4	0.189356	2.05207	0.0944898	9.68962	0.117269	2.72865	4.70897	1.426	64.6101	1.75208	1.71625	0.345317	0.866095	0.17422	12.5084	2.70645	21.4291	2.09876		203_VU110-Z22	9	4	24.8723	0.621606	341.247	9.209	0.624583		203_VU110-Z22	9	4	0.0728865	0.0016466	0.00293043	7.90814e-05	0.50359		203_VU110-Z22	9	4	0.189323	2.05242	0	0	2.49453e-05	9.71074
	195_VU110-Z22	9	4	0.131849	3.2347	0.0360097	29.5748	0.0774146	3.76668	3.20314	1.43281	45.2061	1.67175	1.82401	0.463187	0.920458	0.233682	12.9242	1.84099	38.2492	11.3254		195_VU110-Z22	9	4	24.2963	0.859639	342.877	12.4859	0.812274		195_VU110-Z22	9	4	0.0708603	0.00156022	0.0029165	0.000106204	0.348602		195_VU110-Z22	9	4	0.131836	3.23504	0	0	9.50657e-06	29.5817
			S	7.38022	0.694543	4.14369	1.41635	4.48244	0.893315	173.991	0.419533	2363.68	0.48243																														S	7.37882	0.694675	0	0	0.00109393	1.4252
	Information on Analysis and Constants Used in Calculations									Results		40(a)/36(a)	± 1s	40(r)/39(k)	± 1s	Age	± 1s	MSWD	39Ar(k)	K/Ca	± 1s
																(Ma)			(%,n)
	Sample = 205_VU110-Z22				Age Equations = Min et al. (2000)					Age Plateau				1.41438	0.124894	0.713784	0.063122	0.40887	25.7799	17.5255	1.79098
	Material = San				Negative Intensities = Allowed										0.088303		0.0884329	0.89746	8
	Location = FC				Decay Constant 40K = 5.460 ± 0.053 E-10 1/a					Full External Error							0.0635939	1.53452	1σ Confidence Limit
	Analyst = Xiaolong Zhou				Decay Constant 39Ar = 2.940 ± 0.016 E-07 1/h					Analytical Error							0.063017	1	Error Magnification
	Project = VU110				Decay Constant 37Ar = 8.230 ± 0.012 E-04 1/h
	Mass Discrimination Law = LIN				Decay Constant 36Cl = 2.257 ± 0.015 E-06 1/a					Total Fusion Age				0.922535	0.109802	0.465602	0.0554604		23	18.0552	0.266708
	Irradiation = VU110				Decay Activity 40K(EC,β⁺) = 3.310 ± 0.030 1/gs										0.119022		0.119116
	J = 0.00027560 ± 0.00000141				Decay Activity 40K(β⁻) = 27.890 ± 0.150 1/gs					Full External Error							0.0556894
	28.201 = 1.500 ± 0.005 Ma				Atmospheric Ratio 40/36(a) = 298.56 ± 0.31					Analytical Error							0.0554096
	IGSN = Undefined				Atmospheric Ratio 38/36(a) = 0.1885 ± 0.0003
	Preferred Age = Undefined				Production Ratio 39/37(ca) = 0.000673 ± 0.000004					Normal Isochron		302.467	12.473	1.26068	0.48458	0.636235	0.244534	0.456669	25.7799
	Classification = Undefined				Production Ratio 36/37(ca) = 0.000264 ± 0.000002								0.0412374		0.384379		0.384346	0.840699	8
	Experiment Type = Undefined				Production Ratio 40/39(k) = 0.000860 ± 0.000070					Full External Error							0.244631	1.57735	1σ Confidence Limit
	Extraction Method = Undefined				Production Ratio 38/39(k) = 0.012110 ± 0.000030					Analytical Error							0.244513	1	Error Magnification
	Heating = 90 sec				Production Ratio 36/38(cl) = 262.80 ± 1.71												2		Number of Iterations
	Isolation = 3.00 min				Scaling Ratio K/Ca = 0.430												8.80139e-06		Convergence
	Instrument = HELIX				Abundance Ratio 40K/K = 1.1700 ± 0.0100 E-04
	Lithology = Undefined				Atomic Weight K = 39.0983 ± 0.0001 g					Inverse Isochron		302.748	12.6187	1.26058	0.402993	0.636182	0.203371	0.462932	25.7799
	Lat-Lon = Undefined - Undefined												0.0416806		0.319689		0.319674	0.836199	8
	Feature = Undefined									Full External Error							0.203487	1.57735	1σ Confidence Limit
										Analytical Error							0.203345	1	Error Magnification
																	4		Number of Iterations
																	0.000439642		Convergence
																	0.0641013		Spreading Factor
[truncated: 124 more columns]

## Sheet: VU110-Z22a
	Relative Abundances			36Ar [A]	%1s	37Ar [A]	%1s	38Ar [A]	%1s	39Ar [A]	%1s	40Ar [A]	%1s	40(r)/39(k)	± 1s	Age	± 1s	40Ar(r)	39Ar(k)	K/Ca	± 1s		Normal Isochron			39(k)/36(a)	± 1s	40(a+r)/36(a)	± 1s	r.i.		Inverse Isochron			39(k)/40(a+r)	± 1s	36(a)/40(a+r)	± 1s	r.i.		Degassing Patterns			36Ar(a) [A]	%1s	36Ar(c) [A]	%1s	36Ar(ca) [A]	%1s
																(Ka)		(%)	(%)
	238_VU110-Z22A	20		2.50266	0.462503	0.156344	11.7187	0.64464	0.3345	12.2184	0.104854	730.236	0.0180345	-1.38767	0.290104	-675.661	141.278	-2.32185	6.5088	33.6046	3.93819		238_VU110-Z22A	20		4.88222	0.0231539	291.785	1.35057	0.974511		238_VU110-Z22A	20		0.0167323	1.78023e-05	0.00342718	1.58632e-05	0.00660489		238_VU110-Z22A	20		2.50261	0.462512	0	0	4.12748e-05	11.7362
	239_VU110-Z22A	27		1.30722	0.395767	0.274619	6.82204	0.564982	0.226224	23.3699	0.0943715	382.77	0.0136602	-0.321269	0.0683758	-156.405	33.2891	-1.96148	12.4492	36.5924	2.49659		239_VU110-Z22A	27		17.8786	0.0727459	292.816	1.15964	0.972152		239_VU110-Z22A	27		0.0610573	5.82223e-05	0.00341511	1.35248e-05	0.00494655		239_VU110-Z22A	27		1.30713	0.395794	0	0	7.24995e-05	6.852
	241_VU110-Z22A	32		0.803863	0.411081	0.144403	11.4882	0.446323	0.304463	21.5243	0.0967276	237.784	0.0188011	-0.103179	0.0473265	-50.2298	23.0398	-0.933982	11.4661	64.0946	7.36358		241_VU110-Z22A	32		26.7777	0.113091	295.797	1.21732	0.972401		241_VU110-Z22A	32		0.0905272	8.9206e-05	0.0033807	1.39128e-05	0.00872767		241_VU110-Z22A	32		0.803813	0.411107	0	0	3.81223e-05	11.506
	242_VU110-Z22A	35		0.475182	0.473154	0.158914	12.3251	0.293499	0.376788	14.9824	0.0964346	140.068	0.0237082	-0.120139	0.0459271	-58.4861	22.3587	-1.28505	7.98117	40.54	4.99676		242_VU110-Z22A	35		31.5329	0.152282	294.772	1.39663	0.978631		242_VU110-Z22A	35		0.106974	0.000106236	0.00339246	1.60734e-05	0.0119596		242_VU110-Z22A	35		0.475131	0.473205	0	0	4.19533e-05	12.3417
	244_VU110-Z22A	38		0.39808	0.480828	0.0571051	30.1308	0.25304	0.432668	12.9212	0.109623	119.139	0.0599144	0.0219894	0.045586	10.7047	22.1917	0.238485	6.88323	97.2962	29.3163		244_VU110-Z22A	38		32.4606	0.160094	299.274	1.45021	0.967501		244_VU110-Z22A	38		0.108465	0.000135508	0.00334142	1.61918e-05	0.0593162		244_VU110-Z22A	38		0.398057	0.480857	0	0	1.50757e-05	30.1376
	245_VU110-Z22A	42		0.309805	0.499968	0.0908748	19.5531	0.221785	0.357928	11.9648	0.107034	94.2514	0.0236079	0.146674	0.0395224	71.4015	19.2393	1.86195	6.37371	56.6145	11.0701		245_VU110-Z22A	42		38.624	0.197503	304.225	1.52289	0.976758		245_VU110-Z22A	42		0.126959	0.000139162	0.00328704	1.64542e-05	0.010174		245_VU110-Z22A	42		0.309774	0.50002	0	0	2.39909e-05	19.5636
	247_VU110-Z22A	46		0.351999	0.4893	0.0609206	29.7927	0.235716	0.416019	12.3444	0.109042	104.908	0.0490759	-0.0152875	0.0427907	-7.44217	20.8312	-0.179886	6.57592	87.1307	25.9588		247_VU110-Z22A	46		35.0715	0.175826	298.024	1.46565	0.971185		247_VU110-Z22A	46		0.11768	0.000140724	0.00335544	1.65017e-05	0.0409732		247_VU110-Z22A	46		0.351975	0.489334	0	0	1.6083e-05	29.7996
	248_VU110-Z22A	50	4	0.30975	0.538612	0.0752221	22.9111	0.194809	0.451402	9.9926	0.123452	93.3982	0.0568979	0.0918891	0.0510462	44.7323	24.8494	0.983109	5.32312	57.1214	13.0873		248_VU110-Z22A	50	4	32.2627	0.178291	301.525	1.63323	0.969334		248_VU110-Z22A	50	4	0.106999	0.000145451	0.00331648	1.79639e-05	0.0439829		248_VU110-Z22A	50	4	0.309725	0.538659	0	0	1.98586e-05	22.92
	250_VU110-Z22A	55	4	0.266554	0.453749	0.0663806	38.7606	0.193046	0.458804	10.4892	0.103563	80.6876	0.0296487	0.105166	0.0353935	51.1954	17.2295	1.36712	5.58764	67.9463	26.3365		250_VU110-Z22A	55	4	39.3542	0.18318	302.699	1.37657	0.972857		250_VU110-Z22A	55	4	0.130011	0.00014006	0.00330361	1.50237e-05	0.0179636		250_VU110-Z22A	55	4	0.266531	0.453796	0	0	1.75245e-05	38.7659
	251_VU110-Z22A	60	4	0.242261	0.47517	0.0631121	36.3828	0.181497	0.374228	10.0114	0.107703	73.2525	0.0238037	0.0919941	0.0351862	44.7834	17.1287	1.25727	5.33313	68.21	24.8168		251_VU110-Z22A	60	4	41.3283	0.201381	302.362	1.43869	0.974043		251_VU110-Z22A	60	4	0.136685	0.000150773	0.00330729	1.57367e-05	0.0108153		251_VU110-Z22A	60	4	0.242239	0.47522	0	0	1.66616e-05	36.3884
	253_VU110-Z22A	70		0.313893	0.513458	0.0307038	66.487	0.206854	0.447943	10.6773	0.103735	93.4243	0.022428	-0.0277461	0.046024	-13.5072	22.4053	-0.317105	5.68789	149.533	99.4201		253_VU110-Z22A	70		34.0174	0.178203	297.616	1.52967	0.979263		253_VU110-Z22A	70		0.114299	0.000121312	0.00336003	1.72698e-05	0.00923447		253_VU110-Z22A	70		0.313878	0.513486	0	0	8.10581e-06	66.49
	254_VU110-Z22A	80		0.368393	0.451029	0.0988382	25.3952	0.230617	0.41	11.8111	0.107395	109.337	0.0389241	-0.0551044	0.0432536	-26.8258	21.0568	-0.595262	6.29184	51.3845	13.0493		254_VU110-Z22A	80		32.0639	0.148674	296.793	1.34373	0.969204		254_VU110-Z22A	80		0.108034	0.000123414	0.00336935	1.52547e-05	0.0293102		254_VU110-Z22A	80		0.36836	0.451073	0	0	2.60933e-05	25.4033
	257_VU110-Z22A	15		0.12457	0.75239	0.111171	23.0177	0.160661	0.464042	10.0984	0.119941	38.9775	0.0578333	0.177021	0.028064	86.1741	13.6613	4.58627	5.37946	39.0595	8.99074		257_VU110-Z22A	15		81.0882	0.617988	312.914	2.36201	0.984631		257_VU110-Z22A	15		0.259139	0.000345107	0.00319576	2.4123e-05	0.0333191		257_VU110-Z22A	15		0.124535	0.752621	0	0	2.93491e-05	23.0266
	259_VU110-Z22A	18		0.174762	0.714836	0.216442	10.6257	0.188254	0.332706	11.4145	0.106523	53.6535	0.0513562	0.130172	0.033109	63.3685	16.1173	2.76931	6.08052	22.6766	2.40968		259_VU110-Z22A	18		65.3375	0.472387	307.065	2.2015	0.986542		259_VU110-Z22A	18		0.212781	0.000251658	0.00325664	2.33484e-05	0.0311415		259_VU110-Z22A	18		0.174698	0.715105	0	0	5.71406e-05	10.645
	260_VU110-Z22A	21		0.167631	0.65165	0.0743346	27.597	0.0861179	0.604884	3.90121	0.119241	49.8227	0.0506071	-0.0568665	0.084905	-27.6836	41.3335	-0.44527	2.07818	22.5669	6.22785		260_VU110-Z22A	21		23.2754	0.154215	297.236	1.94306	0.980719		260_VU110-Z22A	21		0.0783062	0.000101438	0.00336433	2.19928e-05	0.0302513		260_VU110-Z22A	21		0.167609	0.651745	0	0	1.96243e-05	27.6045
			S	8.11663	0.174372	1.67938	4.77268	4.10184	0.100915	187.721	0.0283126	2401.71	0.00825144																														S	8.11607	0.174384	0	0	0.000443357	4.77649
	Information on Analysis and Constants Used in Calculations									Results		40(a)/36(a)	± 1s	40(r)/39(k)	± 1s	Age	± 1s	MSWD	39Ar(k)	K/Ca	± 1s
																(Ka)			(%,n)
	Sample = 238_VU110-Z22A				Age Equations = Min et al. (2000)					Age Plateau Overestimated Error				0.0972583	0.0224182	47.346	10.916	0.0416812	16.2439	60.8963	10.5976
	Material = Biotite				Negative Intensities = Allowed										0.230501		0.230557	0.959176	3
	Location = Milos				Decay Constant 40K = 5.460 ± 0.053 E-10 1/a					Full External Error							10.928	2	1σ Confidence Limit
	Analyst = Xiaolong Zhou				Decay Constant 39Ar = 2.940 ± 0.016 E-07 1/h					Analytical Error							10.9132	1	Error Magnification
	Project = VU110				Decay Constant 37Ar = 8.230 ± 0.012 E-04 1/h
	Mass Discrimination Law = LIN				Decay Constant 36Cl = 2.257 ± 0.015 E-06 1/a					Total Fusion Age				-0.114994	0.0231193	-55.9814	11.2589		15	48.065	2.29403
	Irradiation = VU110				Decay Activity 40K(EC,β⁺) = 3.310 ± 0.030 1/gs										0.201048		0.201118
	J = 0.00026580 ± 0.00000138				Decay Activity 40K(β⁻) = 27.890 ± 0.150 1/gs					Full External Error							11.2752
	28.201 = 1.500 ± 0.005 Ma				Atmospheric Ratio 40/36(a) = 298.56 ± 0.31					Analytical Error							11.2551
	IGSN = Undefined				Atmospheric Ratio 38/36(a) = 0.1885 ± 0.0003
	Preferred Age = Undefined				Production Ratio 39/37(ca) = 0.000673 ± 0.000004					Normal Isochron Overestimated Error		298.079	8.76164	0.109773	0.228706	53.4382	111.334	0.0843739	16.2439
	Classification = Undefined				Production Ratio 36/37(ca) = 0.000264 ± 0.000002								0.0293937		2.08345		2.08342	0.771455	3
	Experiment Type = Undefined				Production Ratio 40/39(k) = 0.000860 ± 0.000070					Full External Error							111.336	2.41421	1σ Confidence Limit
	Extraction Method = Undefined				Production Ratio 38/39(k) = 0.012110 ± 0.000030					Analytical Error							111.334	1	Error Magnification
	Heating = 90 sec				Production Ratio 36/38(cl) = 262.80 ± 1.71												3		Number of Iterations
	Isolation = 5.00 min				Scaling Ratio K/Ca = 0.430												2.56276e-07		Convergence
	Instrument = HELIX				Abundance Ratio 40K/K = 1.1700 ± 0.0100 E-04
	Lithology = Undefined				Atomic Weight K = 39.0983 ± 0.0001 g					Inverse Isochron Overestimated Error		298.076	8.76543	0.109847	0.195015	53.4742	94.9337	0.084415	16.2439
	Lat-Lon = Undefined - Undefined												0.0294066		1.77533		1.77532	0.771401	3
	Feature = Undefined									Full External Error							94.9354	2.41421	1σ Confidence Limit
										Analytical Error							94.9333	1	Error Magnification
																	3		Number of Iterations
																	1.78587e-05		Convergence
																	0.00326097		Spreading Factor
[truncated: 124 more columns]

## Sheet: VU110-Z22b
	Relative Abundances			36Ar [A]	%1s	37Ar [A]	%1s	38Ar [A]	%1s	39Ar [A]	%1s	40Ar [A]	%1s	40(r)/39(k)	± 1s	Age	± 1s	40Ar(r)	39Ar(k)	K/Ca	± 1s		Normal Isochron			39(k)/36(a)	± 1s	40(a+r)/36(a)	± 1s	r.i.		Inverse Isochron			39(k)/40(a+r)	± 1s	36(a)/40(a+r)	± 1s	r.i.		Degassing Patterns			36Ar(a) [A]	%1s	36Ar(c) [A]	%1s	36Ar(ca) [A]	%1s
																(Ka)		(%)	(%)
	142_VU110-Z22B	7		1.72389	0.507354	0.21376	9.96723	0.558252	0.34636	16.6215	0.094101	508.603	0.0363745	-0.365502	0.160756	-179.681	79.0315	-1.19448	10.6233	33.4356	3.33275		142_VU110-Z22B	7		9.64216	0.0497562	295.036	1.50078	0.980715		142_VU110-Z22B	7		0.0326813	3.29715e-05	0.00338942	1.72412e-05	0.0257843		142_VU110-Z22B	7		1.72382	0.507375	0	0	5.64326e-05	9.98775
	143_VU110-Z22B	7.8		0.474379	0.493843	0.260134	11.686	0.290308	0.203065	14.8321	0.0854471	140.232	0.0441049	-0.0935829	0.0483718	-46.0036	23.779	-0.989796	9.47964	24.5171	2.86513		143_VU110-Z22B	7.8		31.271	0.15675	295.634	1.46602	0.981457		143_VU110-Z22B	7.8		0.105776	0.000101719	0.00338257	1.67739e-05	0.0408106		143_VU110-Z22B	7.8		0.474302	0.493926	0	0	6.86753e-05	11.7035
	145_VU110-Z22B	8.3		0.314536	0.412995	0.109257	19.7844	0.231391	0.331105	12.6579	0.0788072	94.8955	0.024019	0.0780229	0.0316478	38.3537	15.557	1.04073	8.09013	49.8172	9.85612		145_VU110-Z22B	8.3		40.2477	0.16924	301.7	1.24827	0.980621		145_VU110-Z22B	8.3		0.133403	0.000109914	0.00331455	1.37138e-05	0.0169526		145_VU110-Z22B	8.3		0.3145	0.413046	0	0	2.88439e-05	19.7948
	146_VU110-Z22B	8.6	4	0.176696	0.614283	0.0614358	29.9129	0.151853	0.388954	8.76636	0.0844156	54.2656	0.0328067	0.17226	0.0375482	84.6769	18.4569	2.78277	5.60289	61.357	18.3537		146_VU110-Z22B	8.6	4	49.6184	0.307701	307.107	1.88944	0.98928		146_VU110-Z22B	8.6	4	0.161567	0.00014634	0.00325619	2.00334e-05	0.019342		146_VU110-Z22B	8.6	4	0.176675	0.614362	0	0	1.62191e-05	29.9198
	148_VU110-Z22B	8.9	4	0.174604	0.550349	-0.00138278	1460.99	0.1552	0.277521	8.99571	0.0773156	53.3479	0.0273838	0.134711	0.0324982	66.2196	15.9748	2.27155	5.7495	-2797.37	40869.4		148_VU110-Z22B	8.9	4	51.5221	0.286348	305.501	1.68348	0.98905		148_VU110-Z22B	8.9	4	0.168648	0.000138345	0.00327332	1.80378e-05	0.0166239		148_VU110-Z22B	8.9	4	0.174599	0.550373	0	0	-3.65055e-07	1460.99
	149_VU110-Z22B	9.2	4	0.127806	0.555822	-0.0234743	78.2122	0.115815	0.43013	6.813	0.0914267	38.7475	0.0322059	0.0855792	0.0317241	42.0681	15.5944	1.50475	4.35446	-124.8	97.6092		149_VU110-Z22B	9.2	4	53.3063	0.300271	303.122	1.68765	0.985085		149_VU110-Z22B	9.2	4	0.175858	0.000170481	0.003299	1.83674e-05	0.0192508		149_VU110-Z22B	9.2	4	0.127809	0.555824	0	0	-6.19721e-06	78.2149
	151_VU110-Z22B	10.3	4	0.253817	0.390575	0.0744787	35.3285	0.263441	0.301816	15.8913	0.0793022	77.7348	0.0233665	0.12271	0.0193087	60.3202	9.49136	2.50854	10.1567	91.7473	32.4131		151_VU110-Z22B	10.3	4	62.616	0.249586	306.244	1.19842	0.978253		151_VU110-Z22B	10.3	4	0.204465	0.000169065	0.00326537	1.27784e-05	0.0169422		151_VU110-Z22B	10.3	4	0.253788	0.390629	0	0	1.96624e-05	35.3343
	152_VU110-Z22B	11.1	4	0.23317	0.397476	0.121064	21.3634	0.258388	0.283174	15.7708	0.0836121	71.5028	0.0346272	0.119606	0.0182046	58.7945	8.94863	2.63804	10.0797	56.0151	11.9668		152_VU110-Z22B	11.1	4	67.648	0.274823	306.651	1.22374	0.974892		152_VU110-Z22B	11.1	4	0.220602	0.000199678	0.00326103	1.30137e-05	0.0332729		152_VU110-Z22B	11.1	4	0.233129	0.397557	0	0	3.19608e-05	21.373
	154_VU110-Z22B	12.9	4	0.336116	0.358522	0.0815289	22.1895	0.405202	0.21287	25.0415	0.0872646	103.723	0.0344592	0.134252	0.0150282	65.9938	7.38721	3.24119	16.005	132.074	29.3067		154_VU110-Z22B	12.9	4	74.5106	0.274967	308.563	1.11151	0.96717		154_VU110-Z22B	12.9	4	0.241476	0.000226601	0.00324083	1.16741e-05	0.0352263		154_VU110-Z22B	12.9	4	0.336079	0.358564	0	0	2.15236e-05	22.1987
	155_VU110-Z22B	16.5	4	0.308205	0.51892	0.156555	12.6688	0.386376	0.251714	24.1982	0.0756884	94.6626	0.0188463	0.109127	0.020139	53.6434	9.89954	2.78956	15.4659	66.4636	8.42029		155_VU110-Z22B	16.5	4	78.5272	0.41188	307.129	1.59511	0.988875		155_VU110-Z22B	16.5	4	0.255681	0.000199485	0.00325596	1.69102e-05	0.00884754		155_VU110-Z22B	16.5	4	0.30815	0.519016	0	0	4.13304e-05	12.685
	157_VU110-Z22B	21	4	0.0975229	0.683433	0.086473	29.2002	0.111056	0.385056	6.87302	0.0904877	30.2672	0.0390009	0.167726	0.0293381	82.4479	14.4213	3.80865	4.39277	34.1768	9.97977		157_VU110-Z22B	21	4	70.4945	0.486142	310.384	2.12541	0.989741		157_VU110-Z22B	21	4	0.227121	0.000223831	0.00322182	2.2062e-05	0.0225854		157_VU110-Z22B	21	4	0.0974963	0.683653	0	0	2.28289e-05	29.2073
			S	4.22074	0.227959	1.13983	6.59321	2.92728	0.0995732	156.461	0.0273491	1267.98	0.01615																														S	4.22035	0.227981	0	0	0.000300915	6.59771
	Information on Analysis and Constants Used in Calculations									Results		40(a)/36(a)	± 1s	40(r)/39(k)	± 1s	Age	± 1s	MSWD	39Ar(k)	K/Ca	± 1s
																(Ka)			(%,n)
	Sample = 142_VU110-Z22B				Age Equations = Min et al. (2000)					Age Plateau				0.126987	0.00780758	62.4227	3.84956	0.910827	71.8069	57.3242	8.35302
	Material = Biotite				Negative Intensities = Allowed										0.0614833		0.0616693	0.496618	8
	Location = Milos				Decay Constant 40K = 5.460 ± 0.053 E-10 1/a					Full External Error							3.90853	1.53452	1σ Confidence Limit
	Analyst = Xiaolong Zhou				Decay Constant 39Ar = 2.940 ± 0.016 E-07 1/h					Analytical Error							3.83788	1	Error Magnification
	Project = VU110				Decay Constant 37Ar = 8.230 ± 0.012 E-04 1/h
	Mass Discrimination Law = LIN				Decay Constant 36Cl = 2.257 ± 0.015 E-06 1/a					Total Fusion Age				0.0499871	0.0187993	24.5722	9.24189		11	59.0247	3.89166
	Irradiation = VU110				Decay Activity 40K(EC,β⁺) = 3.310 ± 0.030 1/gs										0.376083		0.376111
	J = 0.00026840 ± 0.00000129				Decay Activity 40K(β⁻) = 27.890 ± 0.150 1/gs					Full External Error							9.24572
	28.201 = 1.500 ± 0.005 Ma				Atmospheric Ratio 40/36(a) = 298.56 ± 0.31					Analytical Error							9.24114
	IGSN = Undefined				Atmospheric Ratio 38/36(a) = 0.1885 ± 0.0003
	Preferred Age = Undefined				Production Ratio 39/37(ca) = 0.000673 ± 0.000004					Normal Isochron		299.333	3.65392	0.115136	0.0553143	56.5972	27.1917	1.0855	71.8069
	Classification = Undefined				Production Ratio 36/37(ca) = 0.000264 ± 0.000002								0.0122069		0.480425		0.480442	0.368237	8
	Experiment Type = Undefined				Production Ratio 40/39(k) = 0.000860 ± 0.000070					Full External Error							27.1986	1.57735	1σ Confidence Limit
	Extraction Method = Undefined				Production Ratio 38/39(k) = 0.012110 ± 0.000030					Analytical Error							27.1903	1.04187	Error Magnification
	Heating = 90 sec				Production Ratio 36/38(cl) = 262.80 ± 1.71												3		Number of Iterations
	Isolation = 5.00 min				Scaling Ratio K/Ca = 0.430												1.74089e-07		Convergence
	Instrument = HELIX				Abundance Ratio 40K/K = 1.1700 ± 0.0100 E-04
	Lithology = Undefined				Atomic Weight K = 39.0983 ± 0.0001 g					Inverse Isochron Clustered Points		299.391	3.66141	0.114501	0.0352181	56.2848	17.3139	1.08875	71.8069
	Lat-Lon = Undefined - Undefined												0.0122295		0.30758		0.307613	0.366248	8
	Feature = Undefined									Full External Error							17.3247	1.57735	1σ Confidence Limit
										Analytical Error							17.3118	1.04343	Error Magnification
																	3		Number of Iterations
																	0.000258052		Convergence
																	0.0107761		Spreading Factor
[truncated: 124 more columns]

## Sheet: Combined (Z22a&b)
	Relative Abundances			36Ar [A]	%1s	37Ar [A]	%1s	38Ar [A]	%1s	39Ar [A]	%1s	40Ar [A]	%1s	40(r)/39(k)	± 1s	Age	± 1s	40Ar(r)	39Ar(k)	K/Ca	± 1s		Normal Isochron			39(k)/36(a)	± 1s	40(a+r)/36(a)	± 1s	r.i.		Inverse Isochron			39(k)/40(a+r)	± 1s	36(a)/40(a+r)	± 1s	r.i.		Degassing Patterns			36Ar(a) [A]	%1s	36Ar(c) [A]	%1s	36Ar(ca) [A]	%1s
																(Ka)		(%)	(%)
	142_VU110-Z22B	7		1.72389	0.507354	0.21376	9.96723	0.558252	0.34636	16.6215	0.094101	508.603	0.0363745	-0.365502	0.160756	-179.681	79.0315	-1.19448	4.80363	33.4356	3.33275		142_VU110-Z22B	7		9.64216	0.0497562	295.036	1.50078	0.980715		142_VU110-Z22B	7		0.0326813	3.29715e-05	0.00338942	1.72412e-05	0.0257843		142_VU110-Z22B	7		1.72382	0.507375	0	0	5.64326e-05	9.98775
	143_VU110-Z22B	7.8		0.474379	0.493843	0.260134	11.686	0.290308	0.203065	14.8321	0.0854471	140.232	0.0441049	-0.0935829	0.0483718	-46.0036	23.779	-0.989796	4.28647	24.5171	2.86513		143_VU110-Z22B	7.8		31.271	0.15675	295.634	1.46602	0.981457		143_VU110-Z22B	7.8		0.105776	0.000101719	0.00338257	1.67739e-05	0.0408106		143_VU110-Z22B	7.8		0.474302	0.493926	0	0	6.86753e-05	11.7035
	145_VU110-Z22B	8.3		0.314536	0.412995	0.109257	19.7844	0.231391	0.331105	12.6579	0.0788072	94.8955	0.024019	0.0780229	0.0316478	38.3537	15.557	1.04073	3.65817	49.8172	9.85612		145_VU110-Z22B	8.3		40.2477	0.16924	301.7	1.24827	0.980621		145_VU110-Z22B	8.3		0.133403	0.000109914	0.00331455	1.37138e-05	0.0169526		145_VU110-Z22B	8.3		0.3145	0.413046	0	0	2.88439e-05	19.7948
	146_VU110-Z22B	8.6	4	0.176696	0.614283	0.0614358	29.9129	0.151853	0.388954	8.76636	0.0844156	54.2656	0.0328067	0.17226	0.0375482	84.6769	18.4569	2.78277	2.53349	61.357	18.3537		146_VU110-Z22B	8.6	4	49.6184	0.307701	307.107	1.88944	0.98928		146_VU110-Z22B	8.6	4	0.161567	0.00014634	0.00325619	2.00334e-05	0.019342		146_VU110-Z22B	8.6	4	0.176675	0.614362	0	0	1.62191e-05	29.9198
	148_VU110-Z22B	8.9	4	0.174604	0.550349	-0.00138278	1460.99	0.1552	0.277521	8.99571	0.0773156	53.3479	0.0273838	0.134711	0.0324982	66.2196	15.9748	2.27155	2.59979	-2797.37	40869.4		148_VU110-Z22B	8.9	4	51.5221	0.286348	305.501	1.68348	0.98905		148_VU110-Z22B	8.9	4	0.168648	0.000138345	0.00327332	1.80378e-05	0.0166239		148_VU110-Z22B	8.9	4	0.174599	0.550373	0	0	-3.65055e-07	1460.99
	149_VU110-Z22B	9.2	4	0.127806	0.555822	-0.0234743	78.2122	0.115815	0.43013	6.813	0.0914267	38.7475	0.0322059	0.0855792	0.0317241	42.0681	15.5944	1.50475	1.96898	-124.8	97.6092		149_VU110-Z22B	9.2	4	53.3063	0.300271	303.122	1.68765	0.985085		149_VU110-Z22B	9.2	4	0.175858	0.000170481	0.003299	1.83674e-05	0.0192508		149_VU110-Z22B	9.2	4	0.127809	0.555824	0	0	-6.19721e-06	78.2149
	151_VU110-Z22B	10.3	4	0.253817	0.390575	0.0744787	35.3285	0.263441	0.301816	15.8913	0.0793022	77.7348	0.0233665	0.12271	0.0193087	60.3202	9.49136	2.50854	4.59261	91.7473	32.4131		151_VU110-Z22B	10.3	4	62.616	0.249586	306.244	1.19842	0.978253		151_VU110-Z22B	10.3	4	0.204465	0.000169065	0.00326537	1.27784e-05	0.0169422		151_VU110-Z22B	10.3	4	0.253788	0.390629	0	0	1.96624e-05	35.3343
	152_VU110-Z22B	11.1	4	0.23317	0.397476	0.121064	21.3634	0.258388	0.283174	15.7708	0.0836121	71.5028	0.0346272	0.119606	0.0182046	58.7945	8.94863	2.63804	4.55779	56.0151	11.9668		152_VU110-Z22B	11.1	4	67.648	0.274823	306.651	1.22374	0.974892		152_VU110-Z22B	11.1	4	0.220602	0.000199678	0.00326103	1.30137e-05	0.0332729		152_VU110-Z22B	11.1	4	0.233129	0.397557	0	0	3.19608e-05	21.373
	154_VU110-Z22B	12.9	4	0.336116	0.358522	0.0815289	22.1895	0.405202	0.21287	25.0415	0.0872646	103.723	0.0344592	0.134252	0.0150282	65.9938	7.38721	3.24119	7.23707	132.074	29.3067		154_VU110-Z22B	12.9	4	74.5106	0.274967	308.563	1.11151	0.96717		154_VU110-Z22B	12.9	4	0.241476	0.000226601	0.00324083	1.16741e-05	0.0352263		154_VU110-Z22B	12.9	4	0.336079	0.358564	0	0	2.15236e-05	22.1987
	155_VU110-Z22B	16.5	4	0.308205	0.51892	0.156555	12.6688	0.386376	0.251714	24.1982	0.0756884	94.6626	0.0188463	0.109127	0.020139	53.6434	9.89954	2.78956	6.99334	66.4636	8.42029		155_VU110-Z22B	16.5	4	78.5272	0.41188	307.129	1.59511	0.988875		155_VU110-Z22B	16.5	4	0.255681	0.000199485	0.00325596	1.69102e-05	0.00884754		155_VU110-Z22B	16.5	4	0.30815	0.519016	0	0	4.13304e-05	12.685
	157_VU110-Z22B	21	4	0.0975229	0.683433	0.086473	29.2002	0.111056	0.385056	6.87302	0.0904877	30.2672	0.0390009	0.167726	0.0293381	82.4479	14.4213	3.80865	1.98631	34.1768	9.97977		157_VU110-Z22B	21	4	70.4945	0.486142	310.384	2.12541	0.989741		157_VU110-Z22B	21	4	0.227121	0.000223831	0.00322182	2.2062e-05	0.0225854		157_VU110-Z22B	21	4	0.0974963	0.683653	0	0	2.28289e-05	29.2073
	238_VU110-Z22A	20		2.50266	0.462503	0.156344	11.7187	0.64464	0.3345	12.2184	0.104854	730.236	0.0180345	-1.37423	0.287458	-675.661	141.359	-2.32185	3.56567	33.6046	3.95252		238_VU110-Z22A	20		4.92998	0.0419979	291.785	1.35057	0.542514		238_VU110-Z22A	20		0.0168959	0.000120912	0.00342718	1.58632e-05	0.000981977		238_VU110-Z22A	20		2.50261	0.462512	0	0	4.16785e-05	11.7575
	239_VU110-Z22A	27		1.30722	0.395767	0.274619	6.82204	0.564982	0.226224	23.3699	0.0943715	382.77	0.0136602	-0.318157	0.0677509	-156.405	33.3075	-1.96148	6.81999	36.5924	2.5233		239_VU110-Z22A	27		18.0535	0.147372	292.816	1.15964	0.484569		239_VU110-Z22A	27		0.0616546	0.000440256	0.00341511	1.35249e-05	0.000660582		239_VU110-Z22A	27		1.30713	0.395794	0	0	7.32087e-05	6.88844
	241_VU110-Z22A	32		0.803863	0.411081	0.144403	11.4882	0.446323	0.304463	21.5243	0.0967276	237.784	0.0188011	-0.10218	0.0468736	-50.2298	23.0425	-0.933982	6.28142	64.0946	7.39147		241_VU110-Z22A	32		27.0396	0.222838	295.797	1.21732	0.498326		241_VU110-Z22A	32		0.0914128	0.000653144	0.0033807	1.39128e-05	0.00120372		241_VU110-Z22A	32		0.803813	0.411107	0	0	3.84952e-05	11.5278
	242_VU110-Z22A	35		0.475182	0.473154	0.158914	12.3251	0.293499	0.376788	14.9824	0.0964346	140.068	0.0237082	-0.118975	0.04549	-58.4861	22.3625	-1.28505	4.37227	40.54	5.0132		242_VU110-Z22A	35		31.8413	0.272801	294.771	1.39663	0.551632		242_VU110-Z22A	35		0.10802	0.00077192	0.00339246	1.60735e-05	0.0016621		242_VU110-Z22A	35		0.475131	0.473205	0	0	4.23636e-05	12.362
	244_VU110-Z22A	38		0.39808	0.480828	0.0571051	30.1308	0.25304	0.432668	12.9212	0.109623	119.139	0.0599144	0.0217764	0.0451447	10.7047	22.1919	0.238485	3.77079	97.2962	29.3325		244_VU110-Z22A	38		32.7781	0.282737	299.274	1.45021	0.553186		244_VU110-Z22A	38		0.109526	0.000787069	0.00334142	1.61918e-05	0.0103123		244_VU110-Z22A	38		0.398057	0.480857	0	0	1.52232e-05	30.1459
	245_VU110-Z22A	42		0.309805	0.499968	0.0908748	19.5531	0.221785	0.357928	11.9648	0.107034	94.2514	0.0236079	0.145253	0.0391531	71.4015	19.2459	1.86195	3.49167	56.6145	11.0846		245_VU110-Z22A	42		39.0018	0.340519	304.225	1.52288	0.572067		245_VU110-Z22A	42		0.128201	0.000918059	0.00328704	1.64542e-05	0.00155734		245_VU110-Z22A	42		0.309774	0.50002	0	0	2.42256e-05	19.5764
	247_VU110-Z22A	46		0.351999	0.4893	0.0609206	29.7927	0.235716	0.416019	12.3444	0.109042	104.908	0.0490759	-0.0151394	0.0423763	-7.44217	20.8312	-0.179886	3.60244	87.1307	25.9734		247_VU110-Z22A	46		35.4146	0.307136	298.024	1.46565	0.561413		247_VU110-Z22A	46		0.118832	0.000852859	0.00335544	1.65017e-05	0.0068269		247_VU110-Z22A	46		0.351975	0.489334	0	0	1.62404e-05	29.808
	248_VU110-Z22A	50	4	0.30975	0.538612	0.0752221	22.9111	0.194809	0.451402	9.9926	0.123452	93.3982	0.0568979	0.090999	0.0505558	44.7323	24.8514	0.983109	2.91613	57.1214	13.0998		248_VU110-Z22A	50	4	32.5783	0.292515	301.524	1.63323	0.596601		248_VU110-Z22A	50	4	0.108045	0.000778585	0.00331648	1.79639e-05	0.00829708		248_VU110-Z22A	50	4	0.309725	0.538659	0	0	2.00529e-05	22.9309
	250_VU110-Z22A	55	4	0.266554	0.453749	0.0663806	38.7606	0.193046	0.458804	10.4892	0.103563	80.6876	0.0296487	0.104147	0.0350584	51.1954	17.2334	1.36712	3.06104	67.9463	26.3453		250_VU110-Z22A	55	4	39.7392	0.336602	302.698	1.37657	0.53461		250_VU110-Z22A	55	4	0.131283	0.000939757	0.00330362	1.50237e-05	0.00270352		250_VU110-Z22A	55	4	0.266531	0.453796	0	0	1.76959e-05	38.7724
	251_VU110-Z22A	60	4	0.242261	0.47517	0.0631121	36.3828	0.181497	0.374228	10.0114	0.107703	73.2525	0.0238037	0.091103	0.0348513	44.7834	17.1316	1.25727	2.92161	68.21	24.8262		251_VU110-Z22A	60	4	41.7326	0.358569	302.362	1.43869	0.552399		251_VU110-Z22A	60	4	0.138022	0.000988539	0.0033073	1.57367e-05	0.00166578		251_VU110-Z22A	60	4	0.242239	0.47522	0	0	1.68246e-05	36.3953
	253_VU110-Z22A	70		0.313893	0.513458	0.0307038	66.487	0.206854	0.447943	10.6773	0.103735	93.4243	0.022428	-0.0274773	0.0455786	-13.5072	22.4055	-0.317105	3.11596	149.533	99.4314		253_VU110-Z22A	70		34.3501	0.302443	297.616	1.52967	0.582638		253_VU110-Z22A	70		0.115418	0.000825914	0.00336004	1.72698e-05	0.0013697		253_VU110-Z22A	70		0.313878	0.513486	0	0	8.1851e-06	66.4938
	254_VU110-Z22A	80		0.368393	0.451029	0.0988382	25.3952	0.230617	0.41	11.8111	0.107395	109.337	0.0389241	-0.0545706	0.0428364	-26.8258	21.0576	-0.595262	3.44682	51.3845	13.0594		254_VU110-Z22A	80		32.3775	0.27393	296.793	1.34373	0.531177		254_VU110-Z22A	80		0.109091	0.000782003	0.00336935	1.52548e-05	0.00467098		254_VU110-Z22A	80		0.36836	0.451073	0	0	2.63485e-05	25.4131
	257_VU110-Z22A	15		0.12457	0.75239	0.111171	23.0177	0.160661	0.464042	10.0984	0.119941	38.9775	0.0578333	0.175306	0.0278198	86.1741	13.6749	4.58627	2.947	39.0595	8.99923		257_VU110-Z22A	15		81.8814	0.851576	312.914	2.36201	0.721535		257_VU110-Z22A	15		0.261674	0.0018843	0.00319577	2.4123e-05	0.00616226		257_VU110-Z22A	15		0.124535	0.752621	0	0	2.96362e-05	23.0375
	259_VU110-Z22A	18		0.174762	0.714836	0.216442	10.6257	0.188254	0.332706	11.4145	0.106523	53.6535	0.0513562	0.128911	0.0328009	63.3685	16.1236	2.76931	3.33105	22.6766	2.42034		259_VU110-Z22A	18		65.9766	0.667481	307.065	2.2015	0.705022		259_VU110-Z22A	18		0.214862	0.00154161	0.00325664	2.33485e-05	0.00513353		259_VU110-Z22A	18		0.174698	0.715105	0	0	5.76996e-05	10.6685
	260_VU110-Z22A	21		0.167631	0.65165	0.0743346	27.597	0.0861179	0.604884	3.90121	0.119241	49.8227	0.0506071	-0.0563156	0.0840835	-27.6836	41.334	-0.44527	1.13848	22.5669	6.23194		260_VU110-Z22A	21		23.5031	0.227846	297.236	1.94305	0.67028		260_VU110-Z22A	21		0.0790722	0.00056887	0.00336433	2.19928e-05	0.00544704		260_VU110-Z22A	21		0.167609	0.651745	0	0	1.98163e-05	27.6135
			S	12.3374	0.138716	2.81921	3.89728	7.02912	0.0720239	344.182	0.0198249	3669.69	0.00776552																														S	12.3364	0.138727	0	0	0.000748609	3.89986
	Information on Analysis and Constants Used in Calculations									Results		40(a)/36(a)	± 1s	40(r)/39(k)	± 1s	Age	± 1s	MSWD	39Ar(k)	K/Ca	± 1s
																(Ka)			(%,n)
	Sample = 142_VU110-Z22B				Age Equations = Min et al. (2000)					Age Plateau				0.123612	0.00736553	60.7637	3.63232	0.815716	41.3682	58.0273	6.32234
	Material = Biotite				Negative Intensities = Allowed										0.0595858		0.0597778	0.613489	11
	Location = Milos				Decay Constant 40K = 5.460 ± 0.053 E-10 1/a					Full External Error							3.69151	1.44721	1σ Confidence Limit
	Analyst = Xiaolong Zhou				Decay Constant 39Ar = 2.940 ± 0.016 E-07 1/h					Analytical Error							3.62059	1	Error Magnification
	Project = VU110				Decay Constant 37Ar = 8.230 ± 0.012 E-04 1/h
	Mass Discrimination Law = LIN				Decay Constant 36Cl = 2.257 ± 0.015 E-06 1/a					Total Fusion Age				-0.0397831	0.0151518	-19.5565	7.44894		26	52.4704	2.04554
	Irradiation = VU110				Decay Activity 40K(EC,β⁺) = 3.310 ± 0.030 1/gs										0.380861		0.380894
	J = 0.00026840 ± 0.00000129				Decay Activity 40K(β⁻) = 27.890 ± 0.150 1/gs					Full External Error							7.45196
	28.201 = 1.500 ± 0.005 Ma				Atmospheric Ratio 40/36(a) = 298.56 ± 0.31					Analytical Error							7.44835
	IGSN = Undefined				Atmospheric Ratio 38/36(a) = 0.1885 ± 0.0003
	Preferred Age = Undefined				Production Ratio 39/37(ca) = 0.000673 ± 0.000004					Normal Isochron		296.771	1.77452	0.15228	0.0295313	74.8555	14.5207	0.822245	41.3682
	Classification = Undefined				Production Ratio 36/37(ca) = 0.000264 ± 0.000002								0.00597943		0.193928		0.193983	0.595528	11
	Experiment Type = Undefined				Production Ratio 40/39(k) = 0.000860 ± 0.000070					Full External Error							14.5434	1.4714	1σ Confidence Limit
	Extraction Method = Undefined				Production Ratio 38/39(k) = 0.012110 ± 0.000030					Analytical Error							14.5163	1	Error Magnification
	Heating = 90 sec				Production Ratio 36/38(cl) = 262.80 ± 1.71												4		Number of Iterations
	Isolation = 5.00 min				Scaling Ratio K/Ca = 0.430												5.54117e-08		Convergence
	Instrument = HELIX				Abundance Ratio 40K/K = 1.1700 ± 0.0100 E-04
	Lithology = Undefined				Atomic Weight K = 39.0983 ± 0.0001 g					Inverse Isochron Clustered Points		296.777	1.77594	0.152415	0.0259487	74.9219	12.7603	0.82835	41.3682
	Lat-Lon = Undefined - Undefined												0.00598408		0.17025		0.170314	0.589842	11
	Feature = Undefined									Full External Error							12.7861	1.4714	1σ Confidence Limit
										Analytical Error							12.7552	1	Error Magnification
																	3		Number of Iterations
																	0.000123815		Convergence
																	0.0225019		Spreading Factor
[truncated: 124 more columns]

## Sheet: VU110-Z23
	Relative Abundances			36Ar [A]	%1s	37Ar [A]	%1s	38Ar [A]	%1s	39Ar [A]	%1s	40Ar [A]	%1s	40(r)/39(k)	± 1s	Age	± 1s	40Ar(r)	39Ar(k)	K/Ca	± 1s		Normal Isochron			39(k)/36(a)	± 1s	40(a+r)/36(a)	± 1s	r.i.		Inverse Isochron			39(k)/40(a+r)	± 1s	36(a)/40(a+r)	± 1s	r.i.		Degassing Patterns			36Ar(a) [A]	%1s	36Ar(c) [A]	%1s	36Ar(ca) [A]	%1s
																(Ma)		(%)	(%)
	226_VU110-Z23	9		0.643948	2.35863	0.426905	2.94643	0.329809	3.74829	10.7001	1.06085	192.765	1.10018	0.050428	0.468235	0.025454	0.236344	0.279912	5.56899	10.7774	0.337506		226_VU110-Z23	9		16.6196	0.429898	299.398	7.79358	0.826558		226_VU110-Z23	9		0.0555099	0.000848408	0.00334003	8.69438e-05	0.304261		226_VU110-Z23	9		0.643811	2.35914	0	0	0.000112703	3.01513
	223_VU110-Z23	9		0.67004	2.3396	0.416827	4.28815	0.34196	3.66828	10.9529	1.21431	201.508	1.20382	0.136224	0.481684	0.0687596	0.243127	0.740427	5.70057	11.2988	0.503562		223_VU110-Z23	9		16.3496	0.43104	300.787	7.91548	0.78928		223_VU110-Z23	9		0.054356	0.000929462	0.00332461	8.74901e-05	0.322076		223_VU110-Z23	9		0.669904	2.34008	0	0	0.000110042	4.33565
	250_VU110-Z23	9		0.307593	3.50549	0.189097	5.48848	0.160778	4.79474	5.73784	2.51709	93.9392	2.56114	0.369033	0.700705	0.186265	0.353653	2.25402	2.98633	13.0474	0.787821		250_VU110-Z23	9		18.6573	0.805279	305.445	13.2626	0.655956		250_VU110-Z23	9		0.0610823	0.00219354	0.00327391	0.000142155	0.420714		250_VU110-Z23	9		0.307532	3.50617	0	0	4.99216e-05	5.52567
	245_VU110-Z23	9		0.857863	2.0121	0.380718	3.65193	0.382791	3.35149	11.205	1.05272	260.346	0.919888	0.379362	0.507745	0.191478	0.256263	1.6327	5.8318	12.6552	0.480978		245_VU110-Z23	9		13.0632	0.296683	303.516	6.71588	0.805872		245_VU110-Z23	9		0.0430397	0.000601714	0.00329472	7.29022e-05	0.273565		245_VU110-Z23	9		0.857735	2.0124	0	0	0.00010051	3.70759
	243_VU110-Z23	9	4	0.541272	2.44092	0.371875	2.75385	0.27368	3.75475	8.51199	1.4049	166.72	1.30643	0.604671	0.52982	0.305189	0.267388	3.08708	4.43013	9.84214	0.304273		243_VU110-Z23	9	4	15.7289	0.443059	308.071	8.53065	0.764199		243_VU110-Z23	9	4	0.0510562	0.000979531	0.00324601	8.98837e-05	0.321301		243_VU110-Z23	9	4	0.541152	2.44146	0	0	9.8175e-05	2.82724
	246_VU110-Z23	9	4	0.399176	2.83791	0.193261	7.90285	0.19067	3.98792	6.22618	2.02977	123.274	1.77542	0.660114	0.647491	0.33317	0.326769	3.33395	3.24049	13.8528	1.1303		246_VU110-Z23	9	4	15.5997	0.544349	308.858	10.3404	0.6896		246_VU110-Z23	9	4	0.0505079	0.00136208	0.00323774	0.000108397	0.349156		246_VU110-Z23	9	4	0.399112	2.83836	0	0	5.10209e-05	7.92872
	227_VU110-Z23	9	4	0.721073	2.32996	0.502774	3.0091	0.360862	3.45505	11.1579	1.16602	223.019	1.07647	0.696733	0.498869	0.351651	0.251762	3.48574	5.80724	9.54259	0.307951		227_VU110-Z23	9	4	15.4771	0.40332	309.343	7.94117	0.811869		227_VU110-Z23	9	4	0.050032	0.000794008	0.00323265	8.29856e-05	0.28446		227_VU110-Z23	9	4	0.720912	2.33048	0	0	0.000132732	3.07641
	237_VU110-Z23	9	4	0.636646	2.21675	0.278376	7.10561	0.280103	3.31697	8.38395	1.55906	196.309	1.29739	0.745737	0.58785	0.376381	0.296664	3.18482	4.36352	12.9502	0.942078		237_VU110-Z23	9	4	13.1705	0.356972	308.382	7.92172	0.705987		237_VU110-Z23	9	4	0.0427086	0.000866273	0.00324273	8.32994e-05	0.323077		237_VU110-Z23	9	4	0.636554	2.21707	0	0	7.34913e-05	7.13437
	242_VU110-Z23	9	4	0.551248	2.77623	0.362633	3.57211	0.304404	3.59668	10.2682	1.17744	173.044	1.24899	0.826849	0.49264	0.417314	0.248609	4.90631	5.34421	12.1755	0.45794		242_VU110-Z23	9	4	18.6308	0.561936	313.965	9.55967	0.839619		242_VU110-Z23	9	4	0.0593405	0.00101862	0.00318507	9.69797e-05	0.2985		242_VU110-Z23	9	4	0.551128	2.77683	0	0	9.57351e-05	3.62899
	225_VU110-Z23	9	4	0.575373	2.13937	0.222775	5.51236	0.260748	3.54289	8.22813	1.74853	179.071	1.48314	0.887555	0.551728	0.447949	0.278423	4.07816	4.28245	15.8817	0.918444		225_VU110-Z23	9	4	14.3021	0.395204	311.254	8.10335	0.636377		225_VU110-Z23	9	4	0.04595	0.00105358	0.00321281	8.3644e-05	0.368523		225_VU110-Z23	9	4	0.575298	2.13965	0	0	5.88125e-05	5.54939
	254_VU110-Z23	9	4	0.509051	2.20864	0.213396	3.20331	0.226553	3.67341	6.77809	1.6723	158.018	1.34516	0.892762	0.58684	0.450577	0.296142	3.82937	3.52774	13.6578	0.493534		254_VU110-Z23	9	4	13.3167	0.368952	310.449	8.0292	0.680954		254_VU110-Z23	9	4	0.0428951	0.000920627	0.00322114	8.33092e-05	0.326003		254_VU110-Z23	9	4	0.50898	2.20895	0	0	5.63366e-05	3.26662
	251_VU110-Z23	9	4	0.581209	2.11083	0.263135	5.17518	0.259806	3.31497	7.82939	1.11216	180.574	0.910723	0.90273	0.513449	0.455607	0.259105	3.914	4.0749	12.7941	0.677233		251_VU110-Z23	9	4	13.4726	0.321482	310.722	7.14419	0.812365		251_VU110-Z23	9	4	0.0433589	0.00062329	0.00321831	7.39961e-05	0.250965		251_VU110-Z23	9	4	0.581122	2.11115	0	0	6.94675e-05	5.2146
	253_VU110-Z23	9	4	0.535858	2.13208	0.222137	4.05657	0.248155	3.34294	8.05809	1.54123	168.976	1.31779	1.11758	0.506241	0.564023	0.255453	5.32938	4.19395	15.5981	0.676879		253_VU110-Z23	9	4	15.0396	0.3957	315.368	7.90544	0.689426		253_VU110-Z23	9	4	0.0476889	0.000967059	0.0031709	7.94862e-05	0.34165		253_VU110-Z23	9	4	0.535784	2.13238	0	0	5.86442e-05	4.10675
	249_VU110-Z23	9	4	0.321803	2.68737	0.0914193	9.61774	0.158182	4.3317	5.83775	2.66679	103.349	2.55434	1.24638	0.633653	0.629018	0.319734	7.04023	3.03836	27.4582	2.7405		249_VU110-Z23	9	4	18.1424	0.686908	321.172	11.9088	0.514526		249_VU110-Z23	9	4	0.056488	0.00208602	0.00311359	0.00011545	0.476548		249_VU110-Z23	9	4	0.321771	2.68764	0	0	2.41347e-05	9.63901
	233_VU110-Z23	9	4	0.51983	1.81324	0.167898	4.84463	0.223449	2.82641	7.82295	1.41465	165.056	1.30317	1.26111	0.453605	0.636452	0.228883	5.97704	4.07158	20.0349	1.01115		233_VU110-Z23	9	4	15.0504	0.346154	317.54	7.09113	0.640273		233_VU110-Z23	9	4	0.0473968	0.000911658	0.00314921	7.03263e-05	0.395402		233_VU110-Z23	9	4	0.519776	1.81343	0	0	4.4325e-05	4.88672
	222_VU110-Z23	9	4	0.455086	2.59552	0.267497	4.84673	0.220158	4.08121	7.19729	2.38131	145.062	2.0657	1.27976	0.644018	0.64586	0.324961	6.34942	3.74591	11.5693	0.624762		222_VU110-Z23	9	4	15.8178	0.557231	318.803	10.5767	0.576626		222_VU110-Z23	9	4	0.0496163	0.00156416	0.00313673	0.000104066	0.408023		222_VU110-Z23	9	4	0.455	2.59601	0	0	7.06192e-05	4.8888
	241_VU110-Z23	9	4	0.654145	1.75273	0.297306	4.18623	0.313851	3.19855	10.5169	1.62247	209.422	1.46353	1.34465	0.437872	0.678604	0.220939	6.75251	5.47364	15.2105	0.682898		241_VU110-Z23	9	4	16.0794	0.384076	320.181	7.31185	0.563358		241_VU110-Z23	9	4	0.0502196	0.00109734	0.00312323	7.1324e-05	0.429279		241_VU110-Z23	9	4	0.654046	1.753	0	0	7.84887e-05	4.23487
	239_VU110-Z23	9	4	0.433806	2.78596	0.209951	7.35997	0.20647	4.12599	6.56234	2.24986	139.364	1.85803	1.50279	0.67795	0.758395	0.342062	7.07618	3.41545	13.44	1.03437		239_VU110-Z23	9	4	15.1295	0.541841	321.296	10.7606	0.647306		239_VU110-Z23	9	4	0.0470888	0.00137405	0.00311239	0.000104238	0.353286		239_VU110-Z23	9	4	0.433736	2.78641	0	0	5.5427e-05	7.38774
	221_VU110-Z23	9	4	0.80293	1.81274	0.336219	3.86818	0.335247	3.04568	9.70523	1.68233	255.134	1.21804	1.59054	0.551727	0.802666	0.278369	6.0502	5.0512	12.412	0.523562		221_VU110-Z23	9	4	12.0886	0.29899	317.787	6.94105	0.608444		221_VU110-Z23	9	4	0.03804	0.000790107	0.00314676	6.87309e-05	0.327055		221_VU110-Z23	9	4	0.80282	1.81299	0	0	8.87619e-05	3.92076
	247_VU110-Z23	9	4	0.496266	2.4507	0.215112	6.33396	0.245072	3.74168	7.53486	1.63569	162.092	1.36923	1.8505	0.565986	0.933825	0.285542	8.6019	3.92162	15.0616	0.985292		247_VU110-Z23	9	4	15.1851	0.447468	326.66	9.17135	0.726157		247_VU110-Z23	9	4	0.046486	0.000991639	0.00306129	8.59491e-05	0.313055		247_VU110-Z23	9	4	0.49619	2.45107	0	0	5.67896e-05	6.36621
	238_VU110-Z23	9	4	0.491214	2.68103	0.20981	6.57695	0.230693	3.78001	7.00386	2.04331	160.136	1.56886	1.92683	0.667737	0.972334	0.336869	8.42719	3.64525	14.3539	0.988561		238_VU110-Z23	9	4	14.2601	0.480743	326.037	10.129	0.686503		238_VU110-Z23	9	4	0.0437376	0.00112677	0.00306714	9.52867e-05	0.307556		238_VU110-Z23	9	4	0.491141	2.68143	0	0	5.53899e-05	6.60801
	234_VU110-Z23	9	4	0.601676	1.76454	0.261623	4.81892	0.238438	3.3003	6.7736	1.0154	192.858	0.788886	1.95474	0.520195	0.986415	0.262433	6.86531	3.52539	11.1327	0.548257		234_VU110-Z23	9	4	11.2591	0.229243	320.569	6.19687	0.791296		234_VU110-Z23	9	4	0.0351224	0.00045163	0.00311946	6.03018e-05	0.250383		234_VU110-Z23	9	4	0.601594	1.76478	0	0	6.90684e-05	4.86123
	235_VU110-Z23	9	4	0.523669	2.12806	0.321333	2.94656	0.266518	3.59657	9.14435	1.25564	180.295	1.15996	2.62146	0.431391	1.32273	0.217592	13.2954	4.75928	12.2365	0.391929		235_VU110-Z23	9	4	17.4651	0.431607	344.344	8.34707	0.756271		235_VU110-Z23	9	4	0.0507199	0.000867047	0.00290407	7.03962e-05	0.324724		235_VU110-Z23	9	4	0.523566	2.12847	0	0	8.48318e-05	3.01526
			S	12.8308	0.481634	6.42208	0.968431	6.05839	0.759267	192.137	0.32827	4030.33	0.284909																														S	12.8287	0.481714	0	0	0.00169543	0.97865
	Information on Analysis and Constants Used in Calculations									Results		40(a)/36(a)	± 1s	40(r)/39(k)	± 1s	Age	± 1s	MSWD	39Ar(k)	K/Ca	± 1s
																(Ma)			(%,n)
	Sample = 226_VU110-Z23				Age Equations = Min et al. (2000)					Age Plateau				1.2873	0.132963	0.649664	0.0671726	1.16215	79.9123	11.9649	0.540043
	Material = San				Negative Intensities = Allowed										0.103289		0.103396	0.283533	19
	Location = FC				Decay Constant 40K = 5.460 ± 0.053 E-10 1/a					Full External Error							0.0675404	1.33333	1σ Confidence Limit
	Analyst = Xiaolong Zhou				Decay Constant 39Ar = 2.940 ± 0.016 E-07 1/h					Analytical Error							0.0670909	1.07803	Error Magnification
	Project = VU110				Decay Constant 37Ar = 8.230 ± 0.012 E-04 1/h
	Mass Discrimination Law = LIN				Decay Constant 36Cl = 2.257 ± 0.015 E-06 1/a					Total Fusion Age				1.04115	0.113246	0.525459	0.0572088		23	12.8645	0.131547
	Irradiation = VU110				Decay Activity 40K(EC,β⁺) = 3.310 ± 0.030 1/gs										0.10877		0.108874
	J = 0.00027560 ± 0.00000141				Decay Activity 40K(β⁻) = 27.890 ± 0.150 1/gs					Full External Error							0.0574914
	28.201 = 1.500 ± 0.005 Ma				Atmospheric Ratio 40/36(a) = 298.56 ± 0.31					Analytical Error							0.057146
	IGSN = Undefined				Atmospheric Ratio 38/36(a) = 0.1885 ± 0.0003
	Preferred Age = Undefined				Production Ratio 39/37(ca) = 0.000673 ± 0.000004					Normal Isochron		311.693	15.5079	0.369962	1.05219	0.186733	0.531054	1.13338	79.9123
	Classification = Undefined				Production Ratio 36/37(ca) = 0.000264 ± 0.000002								0.049754		2.84406		2.84392	0.313395	19
	Experiment Type = Undefined				Production Ratio 40/39(k) = 0.000860 ± 0.000070					Full External Error							0.531058	1.343	1σ Confidence Limit
	Extraction Method = Undefined				Production Ratio 38/39(k) = 0.012110 ± 0.000030					Analytical Error							0.531053	1.0646	Error Magnification
	Heating = 90 sec				Production Ratio 36/38(cl) = 262.80 ± 1.71												6		Number of Iterations
	Isolation = 3.00 min				Scaling Ratio K/Ca = 0.430												6.02401e-07		Convergence
	Instrument = HELIX				Abundance Ratio 40K/K = 1.1700 ± 0.0100 E-04
	Lithology = Undefined				Atomic Weight K = 39.0983 ± 0.0001 g					Inverse Isochron Clustered Points		309.567	16.0146	0.560922	0.132523	0.28311	0.0668976	1.2179	79.9123
	Lat-Lon = Undefined - Undefined												0.0517321		0.236258		0.236295	0.239796	19
	Feature = Undefined									Full External Error							0.0669679	1.343	1σ Confidence Limit
										Analytical Error							0.066882	1.10359	Error Magnification
																	4		Number of Iterations
																	0.00135304		Convergence
																	0.0135858		Spreading Factor
[truncated: 124 more columns]

[truncated: 46 more sheets: VU110-Z23a, VU110-Z23b, Combined (Z23a&b), VU110-Z12, VU110-Z12a, VU110-Z12b, Combined (Z12a&b), VU108-Z5a, VU108-Z5a_5, VU108-Z5b_1, VU108-Z5b_2, VU108-Z6a, VU108-Z6a_4, VU108-Z6a_5, Combined (Z5), VU108-Z6b_1, Combined (Z6), VU108-Z18, VU110-Z4, VU110-Z4_2 …]
