# Supplementary material for: Eruptive history and 40Ar/39Ar geochronology of the Milos volcanicfield, Greece
Source: Copernicus journal article supplement (doi:10.5194/gchron-2020-30), 2020-10-13
Supplement: Supplementary file 1 [file gchron-2020-30-supplement.zip › Supplementary material III.pdf]

Table S2.1. Run conditions of the AxiosMax WD-XRF

| Element | Sample         | Line | Angle (2Th) | Background Offset |         | Tube | KV | mA | Tube Filter | Collimator | Crystal | Detector | PHD |    | Counting Time |     |
|---------|----------------|------|-------------|-------------------|---------|------|----|----|-------------|------------|---------|----------|-----|----|---------------|-----|
|         |                |      |             | Bg1               | Bg2     |      |    |    |             |            |         |          | LL  | UL | Peak          | Bg  |
| Fe      | Bead           | KA   | 57.5344     | -                 | 1.5000  | Rh   | 40 | 90 | No          | 100        | LiF 200 | Duplex   | 35  | 70 | 20            | 20  |
| Mn      | Bead           | KA   | 62.9922     | -1.5000           | 1.5000  | Rh   | 40 | 90 | No          | 300        | LiF 200 | Duplex   | 35  | 70 | 240           | 240 |
| Ti      | Bead           | KA   | 86.1786     | -1.2000           | 2.6000  | Rh   | 40 | 90 | No          | 300        | LiF 200 | Flow     | 30  | 70 | 60            | 120 |
| Ca      | Bead           | KA   | 113.1368    | -3.1600           | -       | Rh   | 40 | 90 | No          | 300        | LiF 200 | Flow     | 34  | 68 | 60            | 60  |
| K       | Bead           | KA   | 136.7132    | -5.0000           | 4.0000  | Rh   | 40 | 90 | No          | 300        | LiF 200 | Flow     | 32  | 72 | 120           | 120 |
| P       | Bead           | KA   | 140.9872    | -6.0000           | 2.5000  | Rh   | 40 | 90 | No          | 300        | Ge 111  | Flow     | 36  | 70 | 120           | 120 |
| Si      | Bead           | KA   | 109.1064    | -                 | 4.0000  | Rh   | 40 | 90 | No          | 300        | PE 002  | Flow     | 30  | 75 | 30            | 60  |
| Al      | Bead           | KA   | 144.9052    | -5.0000           | -       | Rh   | 40 | 90 | No          | 300        | PE 002  | Flow     | 30  | 78 | 60            | 60  |
| Mg      | Bead           | KA   | 22.0352     | -1.6000           | 2.0000  | Rh   | 40 | 90 | No          | 100        | PX1     | Flow     | 28  | 66 | 240           | 240 |
| Na      | Bead           | KA   | 26.6148     | -1.5000           | 1.5000  | Rh   | 40 | 90 | No          | 300        | PX1     | Flow     | 28  | 66 | 240           | 240 |
| Ba      | Bead           | LA   | 87.1496     | -2.1500           | 1.7000  | Rh   | 40 | 90 | No          | 300        | LiF 200 | Flow     | 30  | 65 | 240           | 240 |
| Mo      | Pressed Powder | KA   | 20.2800     | -                 | 0.7000  | Rh   | 60 | 60 | No          | 100        | LiF 200 | Scint.   | 28  | 70 | 300           | 300 |
| Nb      | Pressed Powder | KA   | 21.3750     | -0.3950           | 1.8000  | Rh   | 60 | 60 | No          | 100        | LiF 200 | Scint.   | 28  | 70 | 300           | 240 |
| Zr      | Pressed Powder | KA   | 22.5000     | Nb Bg1            | Nb Bg2  | Rh   | 60 | 60 | No          | 100        | LiF 200 | Scint.   | 28  | 70 | 300           | 240 |
| Y       | Pressed Powder | KA   | 23.7500     | -0.5750           | 0.9500  | Rh   | 60 | 60 | No          | 100        | LiF 200 | Scint.   | 28  | 70 | 300           | 240 |
| Sr      | Pressed Powder | KA   | 25.1060     | Y Bg2             | 0.5940  | Rh   | 60 | 60 | No          | 100        | LiF 200 | Scint.   | 28  | 70 | 300           | 240 |
| U       | Pressed Powder | LA   | 26.1250     | Sr Bg2            | Rb Bg2  | Rh   | 60 | 60 | No          | 100        | LiF 200 | Scint.   | 28  | 70 | 300           | 240 |
| Rb      | Pressed Powder | KA   | 26.5730     | Sr Bg2            | 0.4770  | Rh   | 60 | 60 | No          | 100        | LiF 200 | Scint.   | 28  | 70 | 300           | 240 |
| Th      | Pressed Powder | LA   | 27.4500     | Rb Bg2            | Pb Bg2  | Rh   | 60 | 60 | No          | 100        | LiF 200 | Scint.   | 28  | 70 | 300           | 240 |
| Pb      | Pressed Powder | LB1  | 28.2350     | Rb Bg2            | 0.3650  | Rh   | 60 | 60 | No          | 100        | LiF 200 | Scint.   | 28  | 70 | 300           | 240 |
| Ga      | Pressed Powder | KA   | 38.9000     | -2.1600           | 0.5800  | Rh   | 60 | 60 | No          | 300        | LiF 200 | Duplex   | 37  | 63 | 300           | 300 |
| Zn      | Pressed Powder | KA   | 41.7800     | -0.8800           | 0.7200  | Rh   | 60 | 60 | No          | 300        | LiF 200 | Duplex   | 37  | 63 | 300           | 300 |
| W       | Pressed Powder | LA   | 43.0100     | Zn Bg2            | Ni Bg1  | Rh   | 60 | 60 | No          | 300        | LiF 200 | Duplex   | 37  | 63 | 300           | 300 |
| Ta      | Pressed Powder | LA   | 44.4100     | Ni Bg1            | Ni Bg2  | Rh   | 60 | 60 | No          | 300        | LiF 200 | Duplex   | 37  | 63 | 300           | 300 |
| Cu      | Pressed Powder | KA   | 45.0100     | Ni Bg1            | Ni Bg2  | Rh   | 60 | 60 | No          | 300        | LiF 200 | Duplex   | 37  | 63 | 300           | 300 |
| Hf      | Pressed Powder | LA   | 45.8700     | Ni Bg1            | Ni Bg2  | Rh   | 60 | 60 | No          | 300        | LiF 200 | Duplex   | 37  | 63 | 300           | 300 |
| Er      | Pressed Powder | LB1  | 46.4200     | Ni Bg1            | Ni Bg2  | Rh   | 60 | 60 | No          | 300        | LiF 200 | Duplex   | 37  | 63 | 300           | 300 |
| Ni      | Pressed Powder | KA   | 48.6500     | -5.2500           | 1.2500  | Rh   | 60 | 60 | No          | 300        | LiF 200 | Duplex   | 37  | 63 | 300           | 300 |
| Yb      | Pressed Powder | LA   | 49.0600     | Ni Bg1            | Ni Bg2  | Rh   | 60 | 60 | No          | 300        | LiF 200 | Duplex   | 37  | 63 | 300           | 300 |
| Dy      | Pressed Powder | LB1  | 50.2700     | Ni Bg1            | Ni Bg2  | Rh   | 60 | 60 | No          | 300        | LiF 200 | Duplex   | 37  | 63 | 300           | 300 |
| La      | Pressed Powder | LA   | 82.9228     | -0.8000           | 1.1000  | Rh   | 60 | 60 | No          | 300        | LiF 200 | Flow     | 35  | 65 | 300           | 150 |
| Ce      | Pressed Powder | LB1  | 71.5926     | -0.8000           | -       | Rh   | 60 | 60 | No          | 300        | LiF 200 | Duplex   | 35  | 65 | 300           | 300 |
| Pr      | Pressed Powder | LB1  | 68.2256     | -                 | 0.4200  | Rh   | 60 | 60 | No          | 300        | LiF 200 | Duplex   | 35  | 65 | 300           | 300 |
| Nd      | Pressed Powder | LB1  | 65.0930     | -0.5000           | 0.6500  | Rh   | 60 | 60 | No          | 300        | LiF 200 | Duplex   | 35  | 65 | 300           | 150 |
| Sm      | Pressed Powder | LA   | 66.2442     | -0.4000           | -       | Rh   | 60 | 60 | No          | 300        | LiF 200 | Duplex   | 35  | 65 | 300           | 300 |
| V       | Pressed Powder | KA   | 123.1798    | -2.3700           | 8.8300  | Rh   | 60 | 60 | No          | 300        | LiF 220 | Duplex   | 28  | 75 | 300           | 200 |
| Cr      | Pressed Powder | KA   | 107.1280    | -1.4100           | 2.8900  | Rh   | 60 | 60 | No          | 300        | LiF 220 | Duplex   | 30  | 66 | 300           | 200 |
| Co      | Pressed Powder | KA   | 77.8710     | -3.3900           | -       | Rh   | 60 | 60 | No          | 300        | LiF 220 | Duplex   | 36  | 66 | 300           | 300 |
| Sc      | Pressed Powder | KA   | 97.7000     | -7.7000           | -2.7000 | Rh   | 60 | 60 | No          | 300        | LiF 200 | Flow     | 25  | 75 | 300           | 200 |

Table S2.2a. Precision and accuracy of major-elements measured by WD-XRF.

| AGV-2               |          |                   |        |           |        |    | BCR-2               |          |                   |        |           |        |    |
|---------------------|----------|-------------------|--------|-----------|--------|----|---------------------|----------|-------------------|--------|-----------|--------|----|
| Average (N samples) | St. Dev. | Recommended value | CV (%) | Delta (%) | N      |    | Average (N samples) | St. Dev. | Recommended value | CV (%) | Delta (%) | N      |    |
| <b>Fe2O3</b>        | 6.785    | 0.02              | 6.78   | 0.288     | -1.141 | 25 | <b>Fe2O3</b>        | 13.748   | 0.035             | 13.77  | 0.254     | -0.409 | 23 |
| <b>MnO</b>          | 0.1      | 0.001             | 0.1004 | 0.581     | -1.529 | 25 | <b>MnO</b>          | 0.197    | 0.001             | 0.197  | 0.259     | 0.243  | 23 |
| <b>TiO2</b>         | 1.045    | 0.003             | 1.051  | 0.294     | -1.744 | 25 | <b>TiO2</b>         | 2.246    | 0.007             | 2.265  | 0.303     | -1.084 | 23 |
| <b>CaO</b>          | 5.254    | 0.02              | 5.15   | 0.381     | 0.749  | 25 | <b>CaO</b>          | 7.097    | 0.016             | 7.114  | 0.219     | -0.489 | 23 |
| <b>K2O</b>          | 2.92     | 0.011             | 2.898  | 0.384     | -0.461 | 25 | <b>K2O</b>          | 1.773    | 0.005             | 1.774  | 0.293     | -0.267 | 23 |
| <b>P2O5</b>         | 0.486    | 0.003             | 0.483  | 0.691     | -0.663 | 25 | <b>P2O5</b>         | 0.356    | 0.002             | 0.3593 | 0.573     | -1.159 | 23 |
| <b>SiO2</b>         | 59.91    | 0.338             | 59.14  | 0.563     | 0.049  | 25 | <b>SiO2</b>         | 53.97    | 0.226             | 54.00  | 0.419     | -0.302 | 23 |
| <b>Al2O3</b>        | 17.099   | 0.102             | 17.03  | 0.595     | -0.833 | 25 | <b>Al2O3</b>        | 13.465   | 0.045             | 13.48  | 0.333     | -0.354 | 23 |
| <b>MgO</b>          | 1.793    | 0.011             | 1.8    | 0.595     | -1.635 | 25 | <b>MgO</b>          | 3.58     | 0.013             | 3.60   | 0.355     | -0.782 | 23 |
| <b>Na2O</b>         | 4.269    | 0.033             | 4.204  | 0.767     | 0.28   | 25 | <b>Na2O</b>         | 3.177    | 0.019             | 3.12   | 0.588     | 1.562  | 23 |
| <b>BaO</b>          | 0.127    | 0                 | 0.128  | 0.344     | -1.123 | 25 | <b>BaO</b>          | 0.075    | 0                 | 0.08   | 0.564     | -2.373 | 23 |
| BHVO-2              |          |                   |        |           |        |    | GSP-2               |          |                   |        |           |        |    |
| Average (N samples) | St. Dev. | Recommended value | CV (%) | Delta (%) | N      |    | Average (N samples) | St. Dev. | Recommended value | CV (%) | Delta (%) | N      |    |
| <b>Fe2O3</b>        | 12.295   | 0.03              | 12.39  | 0.246     | -0.766 | 25 | <b>Fe2O3</b>        | 4.906    | 0.011             | 4.961  | 0.223     | -1.11  | 25 |
| <b>MnO</b>          | 0.169    | 0                 | 0.169  | 0.258     | -0.142 | 25 | <b>MnO</b>          | 0.041    | 0.001             | 0.041  | 1.232     | -0.976 | 25 |
| <b>TiO2</b>         | 2.728    | 0.007             | 2.731  | 0.263     | -0.098 | 25 | <b>TiO2</b>         | 0.663    | 0.002             | 0.668  | 0.263     | -0.79  | 25 |
| <b>CaO</b>          | 11.307   | 0.035             | 11.4   | 0.307     | -0.815 | 25 | <b>CaO</b>          | 2.107    | 0.007             | 2.213  | 0.346     | -4.782 | 25 |
| <b>K2O</b>          | 0.509    | 0.002             | 0.513  | 0.384     | -0.764 | 25 | <b>K2O</b>          | 5.422    | 0.019             | 5.457  | 0.346     | -0.65  | 25 |
| <b>P2O5</b>         | 0.265    | 0.002             | 0.268  | 0.597     | -0.94  | 25 | <b>P2O5</b>         | 0.29     | 0.002             | 0.294  | 0.536     | -1.293 | 25 |
| <b>SiO2</b>         | 49.376   | 0.239             | 49.599 | 0.484     | -0.45  | 25 | <b>SiO2</b>         | 66.933   | 0.295             | 67.429 | 0.441     | -0.736 | 25 |
| <b>Al2O3</b>        | 13.444   | 0.065             | 13.44  | 0.484     | 0.027  | 25 | <b>Al2O3</b>        | 14.997   | 0.071             | 15.086 | 0.473     | -0.587 | 25 |
| <b>MgO</b>          | 7.187    | 0.038             | 7.257  | 0.534     | -0.965 | 25 | <b>MgO</b>          | 0.965    | 0.006             | 0.972  | 0.622     | -0.695 | 25 |
| <b>Na2O</b>         | 2.213    | 0.016             | 2.219  | 0.722     | -0.279 | 25 | <b>Na2O</b>         | 2.832    | 0.02              | 2.815  | 0.706     | 0.62   | 25 |
| <b>BaO</b>          | 0.014    | 0                 | 0.015  | 2.875     | -2.74  | 25 | <b>BaO</b>          | 0.15     | 0.001             | 0.152  | 0.389     | -0.673 | 25 |

Precision (given as 1 RSD) and accuracy (difference between [the measured value-reference value]/reference value) \*100%. The reference values are derived from Jochum et al., 2016 and the values published on [georem.mpch-mainz.de](http://georem.mpch-mainz.de).

Table S2.2b. Precision and accuracy of trace-elements measured by WD-XRF.

| AGV-2     |             |          |             |        |           |    | BCR-2     |             |          |             |         |           |    |
|-----------|-------------|----------|-------------|--------|-----------|----|-----------|-------------|----------|-------------|---------|-----------|----|
|           | Average (N) | St. Dev. | Recommended | CV (%) | Delta (%) | N  |           | Average (N) | St. Dev. | Recommended | CV (%)  | Delta (%) | N  |
| <b>Sc</b> | 18.5        | 0.41     | 13.11       | 2.24   | 41.11     | 18 | <b>Sc</b> | 37.16       | 0.84     | 33.53       | 2.25    | 10.83     | 18 |
| <b>V</b>  | 113.13      | 1.74     | 118.5       | 1.54   | -4.53     | 18 | <b>V</b>  | 417.98      | 5.37     | 417.6       | 1.28    | 0.09      | 18 |
| <b>Cr</b> | 14.03       | 0.93     | 16.22       | 6.63   | -13.48    | 18 | <b>Cr</b> | 14.08       | 0.87     | 15.85       | 6.2     | -11.15    | 18 |
| <b>Mn</b> | 832.03      | 15.47    | 777         | 1.86   | 7.08      | 18 | <b>Mn</b> | 1551.91     | 22.42    | 1523        | 1.44    | 1.9       | 18 |
| <b>Co</b> | 15.2        | 0.5      | 15.46       | 3.29   | -1.68     | 18 | <b>Co</b> | 35.19       | 0.89     | 37.33       | 2.52    | -5.72     | 18 |
| <b>Ni</b> | 16.95       | 0.55     | 18.87       | 3.27   | -10.17    | 18 | <b>Ni</b> | 11.48       | 0.35     | 12.57       | 3.05    | -8.64     | 18 |
| <b>Cu</b> | 56.54       | 1.81     | 51.51       | 3.2    | 9.76      | 18 | <b>Cu</b> | 20.37       | 1.13     | 19.66       | 5.54    | 3.59      | 18 |
| <b>Zn</b> | 97.97       | 2.65     | 86.7        | 2.71   | 13        | 18 | <b>Zn</b> | 144.78      | 2.59     | 129.5       | 1.79    | 11.8      | 18 |
| <b>Ga</b> | 21.91       | 0.94     | 20.42       | 4.3    | 7.28      | 18 | <b>Ga</b> | 24.43       | 0.87     | 22.07       | 3.57    | 10.71     | 18 |
| <b>Rb</b> | 67.36       | 2.79     | 67.79       | 4.14   | -0.64     | 18 | <b>Rb</b> | 46.79       | 1.79     | 46.02       | 3.83    | 1.68      | 18 |
| <b>Sr</b> | 626.85      | 19.74    | 659.5       | 3.15   | -4.95     | 18 | <b>Sr</b> | 324.84      | 9.48     | 337.4       | 2.92    | -3.72     | 18 |
| <b>Y</b>  | 18.16       | 0.76     | 19.14       | 4.2    | -5.14     | 18 | <b>Y</b>  | 32.78       | 1.2      | 36.07       | 3.65    | -9.11     | 18 |
| <b>Zr</b> | 230.91      | 7.65     | 232         | 3.31   | -0.47     | 18 | <b>Zr</b> | 184.71      | 5.74     | 186.5       | 3.11    | -0.96     | 18 |
| <b>Nb</b> | 12.33       | 0.53     | 14.12       | 4.34   | -12.65    | 18 | <b>Nb</b> | 11.14       | 0.39     | 12.44       | 3.49    | -10.46    | 18 |
| <b>Mo</b> | 2.04        | 0.18     | 2           | 8.75   | 2.22      | 18 | <b>Mo</b> | 228.67      | 5.91     | 250.6       | 2.58    | -8.75     | 18 |
| <b>Ba</b> | 1273.67     | 37.2     | 1134        | 2.92   | 12.32     | 18 | <b>Ba</b> | 761.96      | 18.55    | 683.9       | 2.44    | 11.41     | 18 |
| <b>La</b> | 50.34       | 4.22     | 38.21       | 8.39   | 31.74     | 18 | <b>La</b> | 37.24       | 3.69     | 25.08       | 9.9     | 48.48     | 18 |
| <b>Ce</b> | 72.99       | 2.85     | 69.43       | 3.91   | 5.13      | 18 | <b>Ce</b> | 59.24       | 2.98     | 53.12       | 5.02    | 11.52     | 18 |
| <b>Nd</b> | 32.79       | 1.74     | 30.49       | 5.3    | 7.56      | 18 | <b>Nd</b> | 32.21       | 1.65     | 28.26       | 5.13    | 13.96     | 18 |
| <b>Sm</b> | 3.89        | 2.05     | 6.55        | 52.65  | -40.6     | 18 | <b>Sm</b> | 5.1         | 1.91     | 6.55        | 37.36   | -22.1     | 18 |
| <b>Hf</b> | 6.13        | 0.69     | 5.14        | 11.3   | 19.4      | 18 | <b>Hf</b> | 6.09        | 0.86     | 4.97        | 14.07   | 22.46     | 18 |
| <b>Ta</b> | 0.45        | 0.38     | 0.79        | 83.93  | -42.68    | 18 | <b>Ta</b> | 0.04        | 0.54     | 0.79        | 1380.93 | -95.05    | 18 |
| <b>W</b>  | 1.01        | 0.67     | 0.55        | 65.86  | 82.84     | 18 | <b>W</b>  | 0.99        | 0.98     | 0.47        | 99.04   | 113.86    | 18 |
| <b>Pb</b> | 11.07       | 0.6      | 13.14       | 5.41   | -15.78    | 18 | <b>Pb</b> | 9.53        | 0.65     | 10.59       | 6.82    | -9.98     | 18 |
| <b>Th</b> | 9.35        | 0.81     | 6.17        | 8.65   | 51.44     | 18 | <b>Th</b> | 7.07        | 0.5      | 5.83        | 7.12    | 21.25     | 18 |
| <b>U</b>  | 3.93        | 0.34     | 1.89        | 8.54   | 108.66    | 18 | <b>U</b>  | 2.73        | 0.31     | 1.68        | 11.5    | 62.41     | 18 |

| BHVO-2 |             |          |             |        |           |    | GSP-2 |             |          |             |        |           |    |
|--------|-------------|----------|-------------|--------|-----------|----|-------|-------------|----------|-------------|--------|-----------|----|
|        | Average (N) | St. Dev. | Recommended | CV (%) | Delta (%) | N  |       | Average (N) | St. Dev. | Recommended | CV (%) | Delta (%) | N  |
| Sc     | 40.48       | 0.72     | 31.83       | 1.77   | 27.17     | 18 | Sc    | 7.89        | 0.45     | 22          | 5.75   | -64.14    | 18 |
| V      | 307.83      | 3.04     | 318.2       | 0.99   | -3.26     | 18 | V     | 47.08       | 0.75     | 52          | 1.6    | -9.47     | 18 |
| Cr     | 298.34      | 3.2      | 287.2       | 1.07   | 3.88      | 18 | Cr    | 19.69       | 0.58     | 20          | 2.97   | -1.56     | 18 |
| Mn     | 1365.89     | 17.76    | 1309        | 1.3    | 4.35      | 18 | Mn    | 323.01      | 5.95     | 314         | 1.84   | 2.87      | 18 |
| Co     | 43.89       | 0.71     | 44.89       | 1.61   | -2.22     | 18 | Co    | 6.24        | 0.43     | 7.3         | 6.89   | -14.54    | 18 |
| Ni     | 119.79      | 1.31     | 119.8       | 1.09   | -0.01     | 18 | Ni    | 15.14       | 0.36     | 17          | 2.36   | -10.95    | 18 |
| Cu     | 132.86      | 2.37     | 129.3       | 1.78   | 2.75      | 18 | Cu    | 41.79       | 1.07     | 43          | 2.56   | -2.82     | 18 |
| Zn     | 115.56      | 2.38     | 103.9       | 2.06   | 11.22     | 18 | Zn    | 124.37      | 1.76     | 120         | 1.42   | 3.64      | 18 |
| Ga     | 22.8        | 0.73     | 15.46       | 3.21   | 47.48     | 18 | Ga    | 23.47       | 0.72     | 22          | 3.09   | 6.67      | 18 |
| Rb     | 9.54        | 0.36     | 9.26        | 3.74   | 3         | 18 | Rb    | 234.19      | 7.2      | 245         | 3.08   | -4.41     | 18 |
| Sr     | 368.77      | 9.9      | 394.1       | 2.68   | -6.43     | 18 | Sr    | 224.12      | 4.82     | 240         | 2.15   | -6.62     | 18 |
| Y      | 23.57       | 0.84     | 25.91       | 3.58   | -9.02     | 18 | Y     | 23.42       | 0.62     | 28          | 2.63   | -16.35    | 18 |
| Zr     | 165.83      | 4.76     | 171.2       | 2.87   | -3.13     | 18 | Zr    | 552.01      | 14.6     | 550         | 2.64   | 0.36      | 18 |
| Nb     | 16.28       | 0.54     | 18.1        | 3.3    | -10.07    | 18 | Nb    | 23.89       | 0.55     | 27          | 2.32   | -11.5     | 18 |
| Mo     | 3.7         | 0.21     | 0.07        | 5.71   | 5341.18   | 18 | Mo    | 1.89        | 0.13     | 2.1         | 7.12   | -9.79     | 18 |
| Ba     | 97.48       | 14.45    | 130.9       | 14.83  | -25.53    | 18 | Ba    | 1458.19     | 31.07    | 1340        | 2.13   | 8.82      | 18 |
| La     | 25.89       | 2.88     | 0.63        | 11.13  | 4029.01   | 18 | La    | 195.32      | 5.27     | 180         | 2.7    | 8.51      | 18 |
| Ce     | 40.09       | 2.45     | 37.53       | 6.12   | 6.83      | 18 | Ce    | 408.28      | 5.96     | 410         | 1.46   | -0.42     | 18 |
| Nd     | 26.58       | 1.41     | 24.27       | 5.31   | 9.53      | 18 | Nd    | 202.24      | 2.33     | 200         | 1.15   | 1.12      | 18 |
| Sm     | 4.83        | 1.97     | 6.02        | 40.85  | -19.75    | 18 | Sm    | 22.41       | 1.9      | 27          | 8.5    | -17.02    | 18 |
| Hf     | 5.37        | 0.74     | 0.58        | 13.84  | 821.79    | 18 | Hf    | 14.65       | 0.96     | 14          | 6.54   | 4.64      | 18 |
| Ta     | 0.66        | 0.74     | 1.15        | 112.61 | -43.19    | 18 | Ta    | 0.22        | 0.52     | 0.8         | 240.74 | -72.92    | 18 |
| W      | 1.09        | 0.86     | 0.25        | 78.69  | 336.03    | 18 | W     | 0.92        | 0.64     | 0.34        | 69.54  | 169.26    | 18 |
| Pb     | 0.36        | 0.37     | 1.65        | 103.55 | -78.49    | 18 | Pb    | 40.39       | 1.81     | 42          | 4.47   | -3.84     | 18 |
| Th     | 3.57        | 0.5      | 1.22        | 14.07  | 191.85    | 18 | Th    | 108.48      | 3.95     | 105         | 3.64   | 3.32      | 18 |
| U      | 1.47        | 0.34     | 0.41        | 22.92  | 257.34    | 18 | U     | 3.54        | 0.32     | 2.4         | 9.15   | 47.45     | 18 |

Precision (given as 1 RSD) and accuracy (difference between the measured value-reference value/reference value) \*100%. The reference values are derived from Jochum et al., 2016 and the values published on [georem.mpch-mainz.de](http://georem.mpch-mainz.de).
